# Supplementary material for: Regulatory network structure determines patterns of intermolecular epistasis
Source: eLife. 2017 Nov 13;6:e28921. doi: 10.7554/eLife.28921 (PMC5699867; doi:10.7554/eLife.28921)
Supplement: Figure 2—source data 1. — The flow cytometry data obtained for 20 cis, trans, and system mutant isolates from each mutation probability library was used to quantify gene expression noise. The data provided here are shown in Figure 2—figure supplements 3, 4 and 5. [file elife-28921-fig2-data1.xlsx]

## Sheet: Sheet1
Coefficient of Variation (CV) was estimated from flow cytometry measurements of 20 cis, 20 trans, and 20 system mutant isolates for each mutation frequency														statistical analyses of gene expression noise
	frequency	location	CV replicate 1	CV replicate 2	CV replicate 3	CV replicate 4	CV replicate 5	CV replicate 6	CV replicate 7	CV replicate 8	CV replicate 9	CV replicate 10		a) comparison across all isolates, of all three mutation frequencies
	low	cis	654.12	423.54	376.23	499.48	456.13	678.47	569.71	666.95	468.94	408.81
	low	cis	602.98	380.94	637.99	479.99	561.73	515.49	513.42	627.72	677.89	453.66		isolates with no fluorescence			isolates with fluorescence
	low	cis	578.6	381.5	400.83	340.08	399.28	574.08	677.7	570.47	606.99	574.88		F94,846 = 1.022	P = 0.438		F84,756 = 0.624	P = 0.877
	low	cis	604.63	338.05	349.69	322.72	649.68	472.92	419.36	517.06	383.53	479.67
	low	cis	515.59	474.93	433.84	345.13	472.78	650.77	372.05	342.52	336.93	564.49
	low	cis	646.49	314.03	577.86	569.77	538.52	636.38	659.18	563.76	529.4	426.06		b) comparison in low mutation probability libraries
	low	cis	632.27	393.19	412.9	582.78	568.77	413.4	370.1	636.26	421.51	446
	low	cis	415.64	348.85	362.21	629.21	434.36	601.78	570.23	366.93	578.34	471.64		isolates with no fluorescence			isolates with fluorescence
	low	cis	439.91	435.56	575.34	331.09	616.95	574.06	401.56	668.76	332.07	433.34		F37,333 = 1.119	P = 0.338		F19,171 = 1.301	P = 0.193
	low	cis	594.14	403.19	430.91	532.69	479.61	525.23	345.92	339.28	445.71	567.13
	low	cis	451.68	600.29	551.54	370.57	385.91	452.56	464.67	670.04	383.11	506.68
	low	cis	535.05	383.46	577.62	510.88	671.78	571.87	664.54	635.62	432.95	599.82		c) comparison in intermediate mutation probability libraries
	low	cis	464.63	533.31	364.84	645.18	516.8	505.52	501.46	373.7	440.04	431.33
	low	cis	414.93	530.08	602.96	666.64	531.95	604.14	588.45	504.99	585.77	423.95		isolates with no fluorescence			isolates with fluorescence
	low	cis	38.82	40.22	36.66	40.2	35.9	37.76	35.59	38.22	37.16	35.7		F32,288 = 1.6	P = 0.065		F24,216 = 1.188	P = 0.276
	low	cis	36.93	38.26	39.11	38.48	37.26	39.77	37.78	39.19	38.55	39.4
	low	cis	40.16	36.2	39.97	36.27	36.3	36.53	38.76	38.68	35.53	38.23
	low	cis	40.42	36.89	39.18	35.94	39.15	39.56	39.7	36.56	40.31	37.97		d) comparison in high mutation probability libraries
	low	cis	36.83	38.46	38.36	37.72	38.54	38.77	37.05	38.44	38.01	40.27
	low	cis	38.59	35.96	35.56	36.44	35.99	38.09	39.37	35.03	36.04	38.82		isolates with no fluorescence			isolates with fluorescence
	low	trans	387.53	566.29	370.02	311.27	580.98	348.11	361.77	446.51	601.66	500.81		F19,171 = 0.809	P = 0.688		F37,333 = 1.591	P = 0.068
	low	trans	510.85	335.22	512.09	384.12	318.75	610.15	683.36	523.37	662.96	614.7
	low	trans	554.66	408.94	515.77	548	347.58	517.98	361.1	389	459.04	629.32
	low	trans	640.1	372.61	416.33	536.66	596.69	569.77	417.56	601.31	391.76	329.12
	low	trans	408.95	383.92	464.44	457.03	481.72	583.4	426.16	694.88	606.16	360.29
	low	trans	632.51	584.19	535.27	595.75	602.57	570.11	613.69	313.55	541.99	578.49
	low	trans	331.93	676.38	622.63	562.69	423.65	308.57	554.87	568.47	409.77	390.08
	low	trans	397.16	438.36	640.05	306.59	674.27	380.68	682.61	311.98	552.04	383.68
	low	trans	450.8	322.63	614.39	652.26	644.67	595.3	544.81	448.31	504.52	389.99
	low	trans	563.11	377.6	560.95	417.5	578.27	607.54	631.26	663.07	423.17	590.15
	low	trans	521.96	610.7	610.46	646.37	315.07	401.43	551.49	327.19	358.7	568.24
	low	trans	596.78	570.06	474.98	695.83	615.45	336.16	685.73	448.09	621.43	403.89
	low	trans	35.67	36.23	36.95	38.35	40.14	35.15	35.89	35.37	37.2	39.11
	low	trans	35.66	39.78	38.39	38.4	37.01	40.13	35.89	36.06	36.44	38.86
	low	trans	35.61	37.82	37.94	40.27	38.43	39.3	36.74	38.62	37.79	40.12
	low	trans	39.14	35.27	36.4	40.45	38.39	35.77	36.08	38.77	36.76	38.54
	low	trans	38.87	37.08	39.27	36.49	38.89	38.43	36.2	40.43	37.53	39.22
	low	trans	36.82	40.07	40.09	38.25	40.13	38.06	37.43	37.22	36.13	35.56
	low	trans	35.29	39.41	36.65	38.74	35.42	38.48	36.42	39.07	39.88	37.83
	low	trans	38.09	36.72	35.02	40.07	38.91	35.72	40	35.81	40.44	38.08
	low	system	321.86	677.2	462.97	597.9	350.67	316.44	608.55	382.28	487.72	585.98
	low	system	468.12	625.81	642.5	390.8	585.12	461.92	349.24	409.87	505.89	649.57
	low	system	592.06	346.61	566.45	385.53	529.63	510.72	334.57	418.28	689.05	571.97
	low	system	646.56	338.17	526.64	556.7	321.25	539.49	517.58	381.88	319.86	456.76
	low	system	358.49	563.35	554.87	422.18	546.03	579.19	333	510.55	441.11	565.34
	low	system	441.47	546.54	328.04	457.89	477.7	665.53	376.51	678.98	396.29	423.01
	low	system	637.04	364.83	517.5	641.38	328.24	649.45	405.29	579.71	390.33	584.81
	low	system	540.95	394.6	342.17	517.53	540.3	475.57	567.72	604.4	374.03	474.61
	low	system	310.43	552.02	466.45	367.88	511.64	486.69	319.35	516.84	570.05	330.3
	low	system	435.28	453.19	327.14	453.55	386.17	414.66	623.14	445.69	561.32	410.66
	low	system	493.7	573.49	543.72	330.45	322.46	566.32	324.04	387.94	431.31	384.72
	low	system	518.72	581.25	629.21	331.64	343.94	458.85	608.3	316.81	649.35	472.28
	low	system	630.62	695.97	668.61	647.17	440.64	669.89	689.77	499.07	429.31	525.78
	low	system	37.69	37.06	39.79	39.99	38.29	36.19	35.67	37.04	39.05	38.44
	low	system	39.21	35.38	39.2	40.15	38.45	38.82	38.44	36.84	36.16	35.99
	low	system	39.33	35.01	35.76	39.47	36.82	35.93	40.17	40.01	36.17	35.78
	low	system	37.53	40.42	39.54	37.54	38.25	38.6	35.75	40.08	39.58	37.96
	low	system	39.91	37.03	38.98	39.34	36.4	37.9	35.02	40.37	37.53	39.01
	low	system	38.57	40.03	40.28	36.38	39.4	35.04	35.84	40.16	37.16	37.6
	low	system	35.12	36.33	35.68	36.83	36.93	35.46	35.52	38.3	36.02	36.7
	intermediate	cis	346.99	350.25	597.89	327.21	688.45	648.27	589.73	367.82	364.19	689.7
	intermediate	cis	605.7	698.19	490.99	550.18	415.41	370.08	493.74	415.83	521.49	539.94
	intermediate	cis	699.49	312.09	521.01	426.2	518.45	511.2	578.24	568.26	649.52	518.97
	intermediate	cis	604.11	380.68	357.77	505.07	580.17	685.62	335.26	557.93	677.23	340.57
	intermediate	cis	518.74	525.52	414	480.41	486.3	446.94	519.89	469.25	632.78	680.2
	intermediate	cis	351.56	541.19	450.7	469.32	439.02	499.23	440.61	483.43	592.58	405.61
	intermediate	cis	465.9	644.22	523.46	607.92	397.87	697.91	320.73	590.05	409.87	673.01
	intermediate	cis	341.63	572.8	670.97	362.08	511.28	634.91	567.59	649.9	670.28	438.94
	intermediate	cis	426.19	418.88	498.35	425.02	517.11	454.87	673.96	576.76	354.93	507.29
	intermediate	cis	466.24	569.84	437.07	622.51	398.49	659.02	500.11	552.41	538.96	656.76
	intermediate	cis	685.96	555.15	503.79	360.22	662.89	482.85	361.3	321.28	495.17	536.75
	intermediate	cis	639.54	319.92	653.86	341.54	417.75	504.67	554.94	309.98	537.4	405.15
	intermediate	cis	441.2	317.79	593.78	314.83	479.08	531.53	540.17	438.34	373.66	332.54
	intermediate	cis	486.18	484.2	631.33	510.57	592.31	479.31	367.19	473.01	539.12	525.13
	intermediate	cis	40.37	38.78	37.24	39.37	39.62	40.43	38.83	40.03	40.14	35.28
	intermediate	cis	39.76	39.2	38.97	37.44	40.15	35.9	36.9	39.14	35.65	37.9
	intermediate	cis	35.29	38.28	35.21	36.08	36.56	36.92	39.11	35.4	37.21	35.9
	intermediate	cis	39.42	36.85	36.75	37.67	37	39.03	39.43	36.33	36.17	36.33
	intermediate	cis	38.3	37.39	39.25	37.1	40.2	35.83	39.5	39.28	40.05	38.38
	intermediate	cis	40.27	37.18	36.82	35.77	37.01	35.34	36.29	39.24	38.45	39.01
	intermediate	trans	642.01	397.63	693.88	471.87	411.05	351.23	464.49	331.72	382.53	686.11
	intermediate	trans	476.17	589.48	566.77	496.79	368.02	416.17	445.1	325.68	444.27	660.72
	intermediate	trans	409.55	346.34	358.94	540.04	534.88	635.06	374.53	568.22	689.55	386.12
	intermediate	trans	487.86	596.44	345.01	446.17	344.91	549.1	639.8	420.81	469.71	648.54
	intermediate	trans	509.62	561.33	657.29	661.56	494.06	628.68	560.82	401.54	507.27	495.89
	intermediate	trans	544.55	535.55	552.53	474.01	363.56	456.81	369.32	356.3	443.12	413.89
	intermediate	trans	399.91	438.01	605.6	581.31	690.65	555.65	564.51	483.01	514.23	608.51
	intermediate	trans	37.17	35.7	36.48	38.64	35.48	36	40.47	39.37	35.4	36.65
	intermediate	trans	37.03	37.25	35.96	39.71	38.97	38.6	35.84	39.86	36.7	36.9
	intermediate	trans	35.63	36.3	37.19	40.42	37.03	35.25	38.92	38.73	36.18	39.73
	intermediate	trans	39.32	36.98	39.16	35.11	37.27	40.04	36.47	35.4	38.9	36.65
	intermediate	trans	36.64	38.74	36.91	37.52	40.23	36.51	36.99	38.56	39.03	36.6
	intermediate	trans	37.65	39.82	40.24	38.46	38.9	36.67	38.41	39.66	39.93	38.68
	intermediate	trans	39.15	37.45	36.84	35.73	35.22	39.44	36.79	39.18	36.04	40.47
	intermediate	trans	39.91	37.87	40.13	35.3	38.92	38.61	36.25	36.66	37.7	39.29
	intermediate	trans	35.88	40.44	39.38	36.58	37.39	39.66	38.06	36.05	35.19	39.14
	intermediate	trans	38.76	38.34	38.22	35.2	37.86	39.24	35.15	40.37	40.36	38.28
	intermediate	trans	38.1	38.08	35.51	40.35	36.34	39.46	38.74	39.61	36.73	36.83
	intermediate	trans	36.1	38.39	36.22	35.84	38.12	37.74	38.91	38.7	35.08	40.45
	intermediate	trans	36.61	40.22	36.58	40.31	38.44	37.38	38.36	40.21	36.4	37.12
	intermediate	system	693.9	519.47	358.46	420.49	387.68	574.64	489.34	422.26	572.97	397.7
	intermediate	system	650.21	565.9	340.35	608.83	355.77	494.67	504.27	406.9	422.29	627.83
	intermediate	system	619.07	632.4	626.56	548.73	488.07	664.31	669.18	360.44	461.29	434.84
	intermediate	system	489.24	508.29	672.21	576.35	671.4	697.47	337.71	349.62	511.53	468.39
	intermediate	system	388.1	406.3	305.26	529.49	345.44	608.08	494.96	577.26	540.67	455.71
	intermediate	system	367.76	554.37	653.1	658.79	645.1	579.36	533.19	339.38	442.66	300.96
	intermediate	system	342.95	620.3	568.5	394.32	320.13	675.74	628.76	440.9	359.99	300.77
	intermediate	system	501.5	632.03	440.28	690.43	360.23	613.3	313.01	596.2	586.96	609.97
	intermediate	system	491.84	430.39	593.59	403.12	314.25	695.7	474.14	543.1	680.33	683.08
	intermediate	system	339.26	474.25	337.79	368.7	683.72	664.6	321.31	658.14	626.62	308.15
	intermediate	system	668.43	617.83	669.39	514.39	693.28	477.7	398.25	489.91	506.8	383.75
	intermediate	system	612.4	405.04	309.58	538.73	552.12	488.18	390.38	344.95	495.7	340.36
	intermediate	system	611.25	635.41	343.2	611.55	606.68	323.22	548.26	616.16	511.83	647.71
	intermediate	system	36.71	36.7	39.93	39.97	38.86	37.46	39.46	38.52	38.4	39.43
	intermediate	system	38.26	36	38.02	39.39	35.48	39.05	37.03	37.29	39.04	37
	intermediate	system	40.1	37.6	35.21	37.23	38.87	38.15	38.81	39.58	37.84	39.94
	intermediate	system	39.74	39.86	39.26	35.95	35.96	36.19	39.8	39.55	39.67	36.15
	intermediate	system	36.84	37.47	35.77	35.08	38.25	39.14	36.32	35.21	40.12	39.93
	intermediate	system	39.39	37.01	36.26	36.71	35.01	38.66	38.54	39.83	38.67	36.58
	intermediate	system	38.73	40.35	37.17	37.2	37.97	39.5	39.57	38.59	38.65	37.74
	high	cis	519.53	335.88	463.49	391.55	594.93	353.19	477.2	353.2	435.03	322.05
	high	cis	697.91	384.43	404.74	682.69	578.9	681.51	443.26	353.71	320.91	616.69
	high	cis	585.56	440.2	424.12	631.91	510.69	609.34	333.4	444.64	608.06	362.79
	high	cis	485.3	452.25	561.96	426.53	353.32	344.48	472.59	577.47	356.79	583.71
	high	cis	451.79	678.47	456.03	688.25	644.41	374	581.63	629.19	524.41	478.16
	high	cis	432.86	471.92	553.88	358.39	419.74	522.41	347.55	374.2	353.55	421.05
	high	cis	618.62	377.87	401.48	561.97	368.91	595.09	435.53	539.63	390.84	548.06
	high	cis	458.38	457.15	362.57	431.11	338.33	370.23	570.27	376.57	634.66	419.65
	high	cis	419.28	323.34	347.95	532.99	589.99	416.94	567.65	524.36	574.25	514.17
	high	cis	365.41	432.98	596.5	509.93	360.38	409.21	666.6	570.19	575.67	477.4
	high	cis	621.73	599.47	646.64	351.66	532.54	580.26	569.75	438.32	353.56	460.53
	high	cis	39.94	38.88	37.04	38.19	37.86	35.09	38.95	40.22	36.31	39.25
	high	cis	36.2	37.47	35.71	38.97	36.63	38.22	37.13	37.72	35.05	39.24
	high	cis	35.82	39.94	36.94	38.95	38.25	40.14	39.66	36.19	35.16	38
	high	cis	39.54	36.74	37.27	38.13	39.63	36.15	36.98	39.63	39.46	35.93
	high	cis	36.92	35.59	39.44	38.89	37.02	36.51	36.15	40.28	35.3	39.09
	high	cis	35.37	39.76	36.79	40.04	39.2	35.95	35.97	38.25	37.07	38.2
	high	cis	39.71	40.36	37.17	37.13	35.44	36.22	39.41	39.18	35.24	37.37
	high	cis	37.07	36.76	36.8	35.43	39.73	36.7	38.88	35.65	35.57	37.42
	high	cis	38.73	39.86	37.84	36.94	39.9	36.66	36.02	37.22	35.93	38.02
	high	trans	392.55	650.54	399.53	452.47	467.58	318.38	358.94	385.67	514.95	523.65
	high	trans	473.65	613.34	461.54	438.49	568.03	576.44	546.91	678.66	341.15	437.69
	high	trans	392.12	501.73	356.19	435.62	447.46	615.91	321.39	380.14	467.74	429.42
	high	trans	351.94	678.08	394.9	593.71	469.49	537.05	607.46	469.9	436.45	680.71
	high	trans	35.56	38.97	38.6	35.44	36.82	36.64	39.27	37.41	38.8	39.63
	high	trans	40.42	36.72	39.5	39.59	37.89	35.38	39.99	37.24	39.68	38.96
	high	trans	35.62	40.17	39.62	35.37	35.92	37.88	36.09	35.77	36.53	37.48
	high	trans	38.85	40.16	39.02	39.34	39.98	36.54	38.7	37.26	38.15	35.74
	high	trans	36.12	40.36	40.46	39.51	35.3	39.23	38.04	38.14	36.54	35.18
	high	trans	35.14	36.88	35.33	40.02	37.93	36.48	39.67	39.3	39.75	37.34
	high	trans	37.2	39.81	40.3	37.49	36.41	38.89	38.12	37.76	36.26	37.24
	high	trans	37.61	35.57	40.04	35.14	37.68	38.46	35.7	36.5	39.58	39.58
	high	trans	38.28	39.06	39.67	38.23	35.23	39.77	37.52	37.37	35.35	36.13
	high	trans	40.21	40.17	39.16	37.5	35.37	40.07	37.87	35.05	37.92	39.76
	high	trans	35	36.56	39.96	39.55	38.7	39.59	38.45	40.1	37.33	38.54
	high	trans	36.41	39.04	37.96	36.98	35.09	40	36.81	39.08	39.16	40.4
	high	trans	35.55	36.93	37.68	38.73	38.84	37.7	38.08	38.54	39.44	37.78
	high	trans	39.56	39.61	37.86	39.04	40.43	35.84	35.36	36.25	39.45	37.29
	high	trans	39.07	38.95	36.44	36.84	35.02	35.1	35.76	38.12	38.25	37.76
	high	trans	39.51	39.86	38.96	36.23	36.84	35.93	39.36	37.3	38.21	36.41
	high	system	538.61	537.5	446.01	433.82	550.32	373.48	450.99	461.81	605.35	426.73
	high	system	403.75	582.51	656.09	507.07	446.33	346.25	453.97	540.54	615.34	427.35
	high	system	559.43	568.68	677.21	450.91	675.52	691.83	629.4	445.44	591.91	335.21
	high	system	421.69	680.02	380.5	330.14	663.32	573.3	493.7	462.99	348.4	533.27
	high	system	687.08	368.87	665.32	642.05	429.02	520.69	585.67	395.57	378.59	438.91
	high	system	623.89	325.85	593.76	514.85	369.56	320.3	312.92	479.75	426.18	573.99
	high	system	37.11	40.05	38.63	36.19	36.87	39.8	36.05	35.95	36.79	35.79
	high	system	36.23	38.86	35.95	36.5	37.02	35.79	39.06	39.83	40.37	38.36
	high	system	36.79	35.09	39.76	39.2	36.53	38.88	38.14	38.31	40.33	38.11
	high	system	39.79	36.05	39.25	35.72	38.72	39.91	36.35	36.29	35.2	35.81
	high	system	39.44	37.82	39.05	36.21	35.41	37.99	37.53	37.54	38.19	36.44
	high	system	35.56	37.15	36.48	38.4	35.84	38.78	35.08	39.7	36.99	38.61
	high	system	36.8	37.4	38.8	36.11	39.19	40.23	35.76	36.06	38.72	37.3
	high	system	40.38	38.95	36.19	38.34	35.99	37.03	37.51	36.47	39.07	37.86
	high	system	36.56	36.75	38.49	38.37	38.39	35.46	38.03	35.62	39.97	35.8
	high	system	35.01	40.18	36.91	37.47	36.62	40.16	37.02	38.75	38.03	35.31
	high	system	36.56	36.13	36.95	38.68	37.67	35.26	36.54	39.59	38.87	37.71
	high	system	39.24	36.06	40.18	39.99	36.86	39.83	39.74	40.26	36.72	36.88
	high	system	40.31	36.86	39.7	40.09	35	37.95	35.68	35.89	37.56	36.33
	high	system	38.1	39.95	39.01	39.85	39.34	37.68	37.5	37.2	38.67	35.7
