# Supplementary material for: Regulatory network structure determines patterns of intermolecular epistasis
Source: eLife. 2017 Nov 13;6:e28921. doi: 10.7554/eLife.28921 (PMC5699867; doi:10.7554/eLife.28921)
Supplement: Figure 2—source data 2. — This data also allowed us to estimate the frequency of ‘back’ cloning (wildtype re-ligating instead of the desired insert), and of the frequency of ‘failed’ cloning (no insert of any type). [file elife-28921-fig2-data2.xlsx]

## Sheet: Sheet1
The number of mutations in each library follows a poisson distribution
	(40 mutants were sequences for each cis and each trans library)
	low frequency cis mutant library				intermediate frequency cis mutant library				intermediate frequency cis mutant library
		mutation number	count			mutation number	count			mutation number	count
		0	17			0	5			0	3
		1	14			1	3			1	0
		2	6			2	6			2	2
		3	2			3	11			3	2
		4	1			4	5			4	5
						5	5			5	4
		expected	observed			6	2			6	9
		0.84	0.9			7	2			7	8
						8	1			8	3
	K-S test :	D=0,075	P=0,999							9	3
						expected	observed			10	1
						3.36	3.15
										expected	observed
					K-S test :	D=0,1	P=0,988			5.88	5.525
									K-S test :	D=0,175	P=0,573
	low frequency trans mutant library				intermediate frequency trans mutant library				high frequency trans mutant library
		mutation number	count			mutation number	count			mutation number	count
		0	0			0	1			0	1
		1	0			21	0			44	1
		2	1			22	0			45	1
		3	2			23	1			46	1
		4	2			24	0			47	3
		5	6			25	1			48	6
		6	7			26	4			49	9
		7	9			27	6			50	8
		8	6			28	7			51	4
		9	2			29	9			52	2
		10	3			30	6			53	3
		11	1			31	2			54	0
		12	1			32	2			55	0
						33	0			56	1
		expected	observed			34	1
		7.14	6.9
						expected	observed			expected	observed
	K-S test :	D=0,175	P=0,573			28.56	27.775			49.266	47
					K-S test :	D=0,275	P=0,097		K-S test :	D=0,2	P=0,401
