# Supplementary material for: Regulatory network structure determines patterns of intermolecular epistasis
Source: eLife. 2017 Nov 13;6:e28921. doi: 10.7554/eLife.28921 (PMC5699867; doi:10.7554/eLife.28921)
Supplement: Figure 3—source data 1. [file elife-28921-fig3-data1.xlsx]

## Sheet: Sheet1
Location of single point mutations in cis and trans in the 150 random system mutant library
trans Mutant identity	trans mutated residue	trans mutation	trans mutation location	+	cis Mutant identity	cis mutated residue	cis mutation	cis mutation location	=	double mutant identity		cI reference sequence		(NTD; linker region; CTD)
trans - 1	1	C	N-Terminal Domain (NTD)	+	cis - 38	25	A	Or2 operator	=	system double 1
trans - 2	9	T	NTD	+	cis - 121	68	T		=	system double 2		1 10 20 30 40 50
trans - 3	15	A	NTD	+	cis - 139	78	G		=	system double 3		| | | | | |
trans - 4	15	C	NTD	+	cis - 37	24	T	Or2 operator	=	system double 4		ATGAGCACAAAAAAGAAACCATTAACACAAGAGCAGCTTGAGGACGCACG
trans - 5	17	T	NTD	+	cis - 97	56	A	Or1 operator/(-10) RNAP site	=	system double 5		TCGCCTTAAAGCAATTTATGAAAAAAAGAAAAATGAACTTGGCTTATCCC
trans - 6	18	G	NTD	+	cis - 18	11	T		=	system double 6		AGGAATCTGTCGCAGACAAGATGGGGATGGGGCAGTCAGGCGTTGGTGCT
trans - 7	24	T	NTD	+	cis - 32	21	G	Or2 operator	=	system double 7		TTATTTAATGGCATCAATGCATTAAATGCTTATAACGCCGCATTGCTTGC
trans - 8	35	A	NTD	+	cis - 61	38	C		=	system double 8		AAAAATTCTCAAAGTTAGCGTTGAAGAATTTAGCCCTTCAATCGCCAGAG
trans - 9	38	G	NTD	+	cis - 112	64	A		=	system double 9		AAATCTACGAGATGTATGAAGCGGTTAGTATGCAGCCGTCACTTAGAAGT
trans - 10	39	G	NTD	+	cis - 77	45	G	Or1 operator	=	system double 10		GAGTATGAGTACCCTGTTTTTTCTCATGTTCAGGCAGGGATGTTCTCACC
trans - 11	42	T	NTD	+	cis - 19	13	A		=	system double 11		TGAGCTTAGAACCTTTACCAAAGGTGATGCGGAGAGATGGGTAAGCACAA
trans - 12	47	A	NTD	+	cis - 54	33	A	Or2 operator/(-35) RNAP site	=	system double 12		CCAAAAAAGCCAGTGATTCTGCATTCTGGCTTGAGGTTGAAGGTAATTCC
trans - 13	50	C	NTD	+	cis - 4	3	G		=	system double 13		ATGACCGCACCAACAGGCTCCAAGCCAAGCTTTCCTGACGGAATGTTAAT
trans - 14	54	A	NTD	+	cis - 64	40	A		=	system double 14		TCTCGTTGACCCTGAGCAGGCTGTTGAGCCAGGTGATTTCTGCATAGCCA
trans - 15	61	C	NTD	+	cis - 72	44	A	Or1 operator	=	system double 15		GACTTGGGGGTGATGAGTTTACCTTCAAGAAACTGATCAGGGATAGCGGT
trans - 16	68	G	NTD	+	cis - 124	69	G		=	system double 16		CAGGTGTTTTTACAACCACTAAACCCACAGTACCCAATGATCCCATGCAA
trans - 17	72	T	NTD	+	cis - 91	53	C	Or1 operator	=	system double 17		TGAGAGTTGTTCCGTTGTGGGGAAAGTTATCGCTAGTCAGTGGCCTGAAG
trans - 18	81	G	NTD	+	cis - 36	24	A	Or2 operator	=	system double 18		AGACGTTTGGCTGA
trans - 19	85	A	NTD	+	cis - 8	6	T		=	system double 19
trans - 20	85	C	NTD	+	cis - 92	54	A	Or1 operator/(-10) RNAP site	=	system double 20
trans - 21	90	A	NTD	+	cis - 57	34	T	(-35) RNAP site	=	system double 22		Pr reference sequence		(CI operators; -10 and -35 of RNAP)
trans - 22	90	C	NTD	+	cis - 76	45	C	Or1 operator	=	system double 21
trans - 23	93	G	NTD	+	cis - 117	67	C		=	system double 23		1 10 20 30 40 50
trans - 24	104	T	NTD	+	cis - 35	23	G	Or2 operator	=	system double 24		| | | | | |
trans - 25	107	G	NTD	+	cis - 45	28	T	Or2 operator	=	system double 25		CTCGAGGATAAATATCTAACACCGTGCGTGTTGACTATTTTACCTCTGGC
trans - 26	114	T	NTD	+	cis - 75	45	A	Or1 operator	=	system double 26		GGTGATAATGGTTGCATGTACTAGAATTCATTAA
trans - 27	129	C	NTD	+	cis - 47	29	C	Or2 operator	=	system double 27
trans - 28	135	C	NTD	+	cis - 26	17	C	Or2 operator	=	system double 28
trans - 29	151	A	NTD	+	cis - 123	69	C		=	system double 29
trans - 30	159	A	NTD	+	cis - 88	51	A	Or1 operator	=	system double 30
trans - 31	160	C	NTD	+	cis - 142	80	T		=	system double 31
trans - 32	166	T	NTD	+	cis - 17	11	G		=	system double 32
trans - 33	174	C	NTD	+	cis - 59	37	C		=	system double 33
trans - 34	174	T	NTD	+	cis - 149	84	C		=	system double 34
trans - 35	179	G	NTD	+	cis - 90	52	C	Or1 operator	=	system double 35
trans - 36	203	G	NTD	+	cis - 114	65	G		=	system double 36
trans - 37	220	T	NTD	+	cis - 5	3	T		=	system double 37
trans - 38	222	C	NTD	+	cis - 40	25	G	Or2 operator	=	system double 38
trans - 39	238	C	NTD	+	cis - 11	8	C		=	system double 39
trans - 40	247	G	NTD	+	cis - 53	32	G	Or2 operator/(-35) RNAP site	=	system double 40
trans - 41	250	A	NTD	+	cis - 107	62	A		=	system double 41
trans - 42	251	C	NTD	+	cis - 125	71	A		=	system double 42
trans - 43	257	T	NTD	+	cis - 67	41	C	Or1 operator	=	system double 43
trans - 44	278	T	linker region	+	cis - 50	30	C	Or2 operator	=	system double 44
trans - 45	279	C	linker region	+	cis - 145	82	A		=	system double 45
trans - 46	282	A	linker region	+	cis - 27	17	G	Or2 operator	=	system double 46
trans - 47	284	T	linker region	+	cis - 9	7	A		=	system double 47
trans - 48	290	G	linker region	+	cis - 78	46	A	Or1 operator	=	system double 48
trans - 49	295	C	linker region	+	cis - 10	7	C		=	system double 49
trans - 50	295	T	linker region	+	cis - 2	1	T		=	system double 50
trans - 51	296	T	linker region	+	cis - 110	63	A		=	system double 51
trans - 52	301	A	linker region	+	cis - 74	44	T	Or1 operator	=	system double 52
trans - 53	308	T	linker region	+	cis - 150	84	G		=	system double 53
trans - 54	311	G	linker region	+	cis - 109	62	G		=	system double 54
trans - 55	319	G	linker region	+	cis - 104	60	C		=	system double 55
trans - 56	322	A	linker region	+	cis - 134	75	T		=	system double 56
trans - 57	326	G	linker region	+	cis - 49	30	A	Or2 operator	=	system double 57
trans - 58	331	A	linker region	+	cis - 144	81	G		=	system double 58
trans - 59	333	T	linker region	+	cis - 84	49	T	Or1 operator	=	system double 59
trans - 60	338	A	linker region	+	cis - 65	40	C		=	system double 60
trans - 61	352	C	linker region	+	cis - 137	78	A		=	system double 61
trans - 62	354	A	linker region	+	cis - 126	71	G		=	system double 62
trans - 63	357	C	linker region	+	cis - 85	50	A	Or1 operator	=	system double 63
trans - 64	358	C	linker region	+	cis - 31	19	C	Or2 operator	=	system double 64
trans - 65	358	G	linker region	+	cis - 6	4	A		=	system double 65
trans - 66	358	T	linker region	+	cis - 115	65	T		=	system double 66
trans - 67	371	C	linker region	+	cis - 81	48	T	Or1 operator	=	system double 68
trans - 68	371	T	linker region	+	cis - 96	55	T	Or1 operator/(-10) RNAP site	=	system double 67
trans - 69	372	C	linker region	+	cis - 63	39	A		=	system double 69
trans - 70	373	T	linker region	+	cis - 122	69	A		=	system double 70
trans - 71	375	C	linker region	+	cis - 143	81	C		=	system double 72
trans - 72	375	G	linker region	+	cis - 98	56	C	Or1 operator/(-10) RNAP site	=	system double 71
trans - 73	378	C	linker region	+	cis - 14	10	C		=	system double 73
trans - 74	384	T	linker region	+	cis - 7	6	C		=	system double 74
trans - 75	386	A	linker region	+	cis - 138	78	C		=	system double 75
trans - 76	389	T	linker region	+	cis - 46	29	A	Or2 operator	=	system double 76
trans - 77	395	A	linker region	+	cis - 29	18	G	Or2 operator	=	system double 77
trans - 78	398	T	Carboxy-Terminal Domain (CTD)	+	cis - 62	38	G		=	system double 78
trans - 79	405	G	CTD	+	cis - 131	74	T		=	system double 79
trans - 80	417	C	CTD	+	cis - 51	30	T	Or2 operator	=	system double 80
trans - 81	432	C	CTD	+	cis - 39	25	C	Or2 operator	=	system double 81
trans - 82	438	A	CTD	+	cis - 42	26	C	Or2 operator	=	system double 82
trans - 83	439	A	CTD	+	cis - 93	54	C	Or1 operator/(-10) RNAP site	=	system double 83
trans - 84	440	T	CTD	+	cis - 136	77	G		=	system double 84
trans - 85	443	T	CTD	+	cis - 113	64	C		=	system double 85
trans - 86	445	G	CTD	+	cis - 103	60	A		=	system double 86
trans - 87	447	C	CTD	+	cis - 28	18	C	Or2 operator	=	system double 88
trans - 88	447	G	CTD	+	cis - 99	58	C	(-10) RNAP site	=	system double 87
trans - 89	477	T	CTD	+	cis - 55	34	C	(-35) RNAP site	=	system double 89
trans - 90	484	G	CTD	+	cis - 71	43	A	Or1 operator	=	system double 90
trans - 91	494	A	CTD	+	cis - 73	44	G	Or1 operator	=	system double 91
trans - 92	495	C	CTD	+	cis - 132	75	C		=	system double 92
trans - 93	496	A	CTD	+	cis - 33	21	T	Or2 operator	=	system double 93
trans - 94	496	C	CTD	+	cis - 146	82	C		=	system double 94
trans - 95	498	A	CTD	+	cis - 79	47	G	Or1 operator	=	system double 95
trans - 96	501	G	CTD	+	cis - 87	50	T	Or1 operator	=	system double 96
trans - 97	502	G	CTD	+	cis - 60	37	T		=	system double 97
trans - 98	505	A	CTD	+	cis - 25	16	A		=	system double 98
trans - 99	507	A	CTD	+	cis - 15	10	G		=	system double 99
trans - 100	508	T	CTD	+	cis - 147	82	G		=	system double 100
trans - 101	519	C	CTD	+	cis - 68	42	C	Or1 operator	=	system double 101
trans - 102	521	T	CTD	+	cis - 129	73	C		=	system double 102
trans - 103	523	A	CTD	+	cis - 106	61	T		=	system double 104
trans - 104	523	C	CTD	+	cis - 118	67	G		=	system double 103
trans - 105	523	T	CTD	+	cis - 69	42	G	Or1 operator	=	system double 105
trans - 106	531	T	CTD	+	cis - 44	28	C	Or2 operator	=	system double 106
trans - 107	534	A	CTD	+	cis - 24	15	G		=	system double 108
trans - 108	534	C	CTD	+	cis - 89	52	A	Or1 operator	=	system double 107
trans - 109	537	A	CTD	+	cis - 80	48	C	Or1 operator	=	system double 110
trans - 110	537	G	CTD	+	cis - 20	14	C		=	system double 109
trans - 111	540	A	CTD	+	cis - 22	14	T		=	system double 111
trans - 112	546	C	CTD	+	cis - 94	54	T	Or1 operator/(-10) RNAP site	=	system double 112
trans - 113	554	G	CTD	+	cis - 105	60	T		=	system double 113
trans - 114	555	A	CTD	+	cis - 133	75	G		=	system double 115
trans - 115	555	G	CTD	+	cis - 130	73	G		=	system double 114
trans - 116	557	C	CTD	+	cis - 48	29	G	Or2 operator	=	system double 116
trans - 117	558	A	CTD	+	cis - 119	68	A		=	system double 117
trans - 118	559	A	CTD	+	cis - 108	62	C		=	system double 118
trans - 119	559	T	CTD	+	cis - 12	8	G		=	system double 119
trans - 120	561	A	CTD	+	cis - 127	71	T		=	system double 120
trans - 121	567	C	CTD	+	cis - 135	76	C		=	system double 121
trans - 122	569	C	CTD	+	cis - 101	58	T	(-10) RNAP site	=	system double 122
trans - 123	570	G	CTD	+	cis - 116	67	A		=	system double 123
trans - 124	576	A	CTD	+	cis - 102	59	G	(-10) RNAP site	=	system double 124
trans - 125	585	C	CTD	+	cis - 111	63	C		=	system double 125
trans - 126	586	T	CTD	+	cis - 86	50	G	Or1 operator	=	system double 126
trans - 127	597	G	CTD	+	cis - 30	18	T	Or2 operator	=	system double 127
trans - 128	598	C	CTD	+	cis - 148	83	G		=	system double 128
trans - 129	600	G	CTD	+	cis - 56	34	G	(-35) RNAP site	=	system double 129
trans - 130	605	G	CTD	+	cis - 34	22	A	Or2 operator	=	system double 130
trans - 131	606	A	CTD	+	cis - 58	36	A	(-35) RNAP site	=	system double 131
trans - 132	617	T	CTD	+	cis - 52	32	C	Or2 operator/(-35) RNAP site	=	system double 132
trans - 133	618	C	CTD	+	cis - 41	26	A	Or2 operator	=	system double 133
trans - 134	622	T	CTD	+	cis - 100	58	G	(-10) RNAP site	=	system double 134
trans - 135	624	G	CTD	+	cis - 141	80	C		=	system double 135
trans - 136	626	G	CTD	+	cis - 95	55	C	Or1 operator/(-10) RNAP site	=	system double 136
trans - 137	627	G	CTD	+	cis - 120	68	C		=	system double 137
trans - 138	632	C	CTD	+	cis - 140	79	A		=	system double 138
trans - 139	637	T	CTD	+	cis - 13	8	T		=	system double 139
trans - 140	640	T	CTD	+	cis - 128	72	G		=	system double 140
trans - 141	641	G	CTD	+	cis - 82	49	A	Or1 operator	=	system double 141
trans - 142	644	T	CTD	+	cis - 66	40	G		=	system double 142
trans - 143	669	C	CTD	+	cis - 21	14	G		=	system double 143
trans - 144	675	G	CTD	+	cis - 3	2	A		=	system double 144
trans - 145	686	A	CTD	+	cis - 70	42	T	Or1 operator	=	system double 145
trans - 146	690	C	CTD	+	cis - 43	26	T	Or2 operator	=	system double 146
trans - 147	690	T	CTD	+	cis - 83	49	C	Or1 operator	=	system double 147
trans - 148	704	T	CTD	+	cis - 23	15	A		=	system double 148
trans - 149	708	A	CTD	+	cis - 16	11	C		=	system double 149
trans - 150	710	T	CTD	+	cis - 1	1	G		=	system double 150
