# Supplementary material for: Regulatory network structure determines patterns of intermolecular epistasis
Source: eLife. 2017 Nov 13;6:e28921. doi: 10.7554/eLife.28921 (PMC5699867; doi:10.7554/eLife.28921)
Supplement: Figure 3—source data 2. — The data provided here are shown in Figure 3, Figure 2—figure supplement 2, and Figure 3—figure supplement 1. [file elife-28921-fig3-data2.xlsx]

## Sheet: Sheet1
Measurements of single and double mutant effects, as well as calculation of epistasis
	trans Mutant identity	OD-normalized mean fluorescence in absence of CI	standard deviation absence of CI	OD-normalized mean fluorescence in presence of CI	standard deviation presence of CI	cis Mutant identity	fluorescence in the absence of CI	standard deviation in the absence CI	fluorescence in the presence of CI	standard deviation in the presence of CI	double mutant identity	fluorescence in the absence of CI	standard deviation in the absence of CI	fluorescence in the presence of CI	standard deviation in the presence of CI	trans wt normalized	trans wt normalized st.dev	cis wt normalized in presence of CI	cis wt normalized in presence of CI st.dev	system wt normalized in presence of CI	system wt normalized in presence of CI st.dev	Multiplicative epistasis presence of CI	Multiplicative Epistasis presence of CI st.dev	Epistasis T value	FDR-corrected P value
	trans - 1	237645	578.401	1564.02	446.785	cis - 38	66829.9	1936.51	12283.8	1084.6	system double 1	66771.1	1069.61	12535.7	1138.87	1.16435	0.332614	9.14483	0.00483336	9.3323	0.00507522	0.876451	0.341636	-0.885828	0.416274
	trans - 2	234741	1481.88	1365.98	429.54	cis - 121	213137	843.759	30275.2	5791.65	system double 2	213055	977.693	38304.1	4123.95	1.01692	0.319775	22.5386	0.0258097	28.5159	0.0183778	1.24415	0.829149	0.721274	0.503047
	trans - 3	235967	1701.87	1090.24	407.975	cis - 139	84038.5	4607.68	7590.55	1602.39	system double 3	84022.8	1558.96	102903	987.509	0.811643	0.303721	5.65087	0.00714084	76.6074	0.0044007	16.7028	4.17227	9.21896	0.000252142
	trans - 4	232511	563.936	126480	3449.23	cis - 37	66588.1	1996.92	7966.67	1658.33	system double 4	66618.6	969.741	7756.7	2416.72	94.1593	2.56782	5.93087	0.00739014	5.77456	0.0107698	0.0103404	2.50014	-0.96961	0.376773
	trans - 5	227685	437.195	1471.22	281.036	cis - 97	166797	1070.18	22961.7	353.327	system double 5	166749	1249.87	88714.4	4528.59	1.09527	0.20922	17.0941	0.00157455	66.0443	0.0201811	3.52752	0.813897	7.60679	0.000623829
	trans - 6	233328	1240.13	155302	2851.82	cis - 18	20080	873.333	5700.6	1215.47	system double 6	20041.9	1797.63	11727.8	1636.42	115.616	2.12307	4.24387	0.0054166	8.7309	0.00729249	0.0177942	4.36778	-0.55083	0.605456
	trans - 7	227019	817.367	21939.8	1843.41	cis - 32	58881	1250	6044.87	913.782	system double 7	58948.6	1129.09	8444.07	1670.87	16.3333	1.37234	4.50017	0.00407215	6.28627	0.00744603	0.0855244	1.91702	-1.16848	0.295291
	trans - 8	228619	1527.23	233362	20692.7	cis - 61	93460.7	642.188	9698.11	1216.98	system double 8	93392.4	587.041	108233	945.323	173.729	0.0922143	7.21986	0.00542332	80.5751	0.00421271	0.0642391	1.02913	-2.22725	0.0764287
	trans - 9	239555	1038.26	915.564	492.269	cis - 112	100139	5836.93	29428.6	8987.33	system double 9	100133	500.24	6114.25	2474.04	0.681601	0.366475	21.9084	0.0400509	4.55182	0.0110252	0.30482	0.278092	-6.12328	0.00168521
	trans - 10	212910	872.905	1469.39	487.785	cis - 77	117066	257.102	35814.1	5328.53	system double 10	117078	1695.81	18918.9	1998.33	1.0939	0.363136	26.6622	0.0237459	14.0844	0.00890529	0.482907	0.360933	-3.50927	0.0171139
	trans - 11	242217	1251.97	1611.11	600.754	cis - 19	221002	341.168	4128.21	5301.28	system double 11	220939	901.665	110526	701.202	1.19941	0.447237	3.07328	0.0236245	82.2819	0.00312481	22.3221	12.0832	4.32239	0.00755354
	trans - 12	233708	655.737	1325.36	445.599	cis - 54	86576.2	1252.78	57594.8	4235.44	system double 12	86604.4	1496.94	49387.3	5425.84	0.986677	0.331731	42.8771	0.0188747	36.7669	0.0241795	0.869074	0.75868	-0.42271	0.69007
	trans - 13	216298	949.758	251397	38740	cis - 4	5330.84	485.582	6287.45	856.71	system double 13	5336.61	531.395	52094.9	1351.03	187.155	0.17264	4.68075	0.00381782	38.7826	0.0060207	0.0442711	1.43041	-1.63662	0.162636
	trans - 14	213276	769.252	1284.31	477.297	cis - 64	96844.2	491.282	31849.4	5200.44	system double 14	96921.5	1194.18	30874	2216.16	0.956121	0.355328	23.7106	0.0231751	22.9845	0.00987603	1.01386	0.654995	0.0518419	0.960662
	trans - 15	233595	602.939	1586.21	213.032	cis - 72	109597	751.923	36466.7	4944.43	system double 15	109574	916.217	117339	1941.44	1.18087	0.158594	27.148	0.0220342	87.3546	0.00865179	2.72488	1.70799	2.4737	0.0562741
	trans - 16	212439	727.519	3124.35	368.254	cis - 124	35734.3	3266.37	17634.7	2057.22	system double 16	35774.8	947.873	48316.9	3579.98	2.32596	0.274151	13.1283	0.00916775	35.97	0.0159537	1.17796	0.764401	0.57025	0.593177
	trans - 17	210338	1444.74	1095.65	508.231	cis - 91	147656	1508.55	39413.8	5725.93	system double 17	147678	1087.79	59581.7	6276.3	0.81567	0.378358	29.342	0.0255169	44.3562	0.0279695	1.85332	1.50087	1.39266	0.222479
	trans - 18	236258	1490.48	1373.56	436.706	cis - 36	64425.1	678.862	5331.52	854.62	system double 18	64465.7	826.229	32861.6	3140.87	1.02256	0.32511	3.96911	0.0038085	24.4642	0.0139969	6.02764	2.00594	6.13935	0.00166547
	trans - 19	240432	708.665	1365.74	302.272	cis - 8	8389.61	106.061	7561.46	718.937	system double 19	8408.61	873.58	8048.71	853.706	1.01674	0.225029	5.62921	0.00320385	5.99194	0.00380443	1.04691	0.240274	0.47826	0.652645
	trans - 20	227518	1398.79	1484	522.854	cis - 92	149815	1107.84	14705.5	1070.98	system double 20	149912	935.953	50783.5	4143.85	1.10478	0.389244	10.9477	0.00477269	37.8063	0.0184665	3.12584	1.35409	3.84556	0.0120554
	trans - 21	217092	584.559	1405.5	320.911	cis - 57	91407.1	1279.17	35778.8	1475.31	system double 22	91328.3	1214.43	10128	1569.6	1.04634	0.238906	26.6359	0.00657451	7.53988	0.00699472	0.270536	0.0825713	-21.6396	3.90993e-06
	trans - 22	235538	1313.54	91729.2	2534.31	cis - 76	115096	727.451	21995	1550.03	system double 21	115016	1044.71	23535.7	384.622	68.2887	1.8867	16.3744	0.00690751	17.5214	0.00171402	0.0156695	2.01886	-1.19429	0.285925
	trans - 23	225219	1232.21	1594.83	347.814	cis - 117	106244	9687.85	14439.9	1243.39	system double 23	106251	515.548	39725.9	2462	1.18729	0.258934	10.75	0.005541	29.5744	0.0109716	2.31715	0.725605	4.44641	0.00672472
	trans - 24	240358	1412.27	21263.2	1216.41	cis - 35	63404.1	328.571	8192.54	988.507	system double 24	63385.3	494.205	8499.4	739.12	15.8296	0.905573	6.09902	0.00440515	6.32746	0.00329379	0.0655391	0.939493	-2.43637	0.0589165
	trans - 25	237329	522.505	1282.35	944.846	cis - 45	74454	619.003	44916.7	3904.17	system double 25	74538.5	1045.1	43365.7	5172.91	0.954661	0.7034	33.4387	0.0173984	32.284	0.0230524	1.01132	0.898537	0.030867	0.97657
	trans - 26	244260	926.928	251345	26710.1	cis - 75	114737	842.105	88929.3	7323.23	system double 26	114735	1096.21	123364	3484.57	187.116	0.11903	66.2043	0.032635	91.8395	0.0155285	0.00741365	0.165895	-14.6558	2.67195e-05
	trans - 27	231807	962.782	1245.61	406.17	cis - 47	75890.8	2495.1	45280	7209.76	system double 27	75867.8	1314.35	59652.6	3349.62	0.92731	0.302377	33.7092	0.0321294	44.409	0.0149271	1.42068	1.58941	0.648331	0.545364
	trans - 28	243361	1243.26	4723.4	760.584	cis - 26	56115.6	718.254	56629.6	6840.4	system double 28	56117.7	713.315	57843.4	1032.98	3.51639	0.566225	42.1585	0.0304833	43.0621	0.00460332	0.290478	0.688372	-2.52475	0.0528674
	trans - 29	244732	414.595	16172.9	662.316	cis - 123	39506.4	2621.3	5345.24	651.673	system double 29	39429	530.189	79109.5	3198.95	12.0401	0.493068	3.97932	0.00290409	58.8939	0.0142557	1.22922	7.29741	0.0769426	0.941653
	trans - 30	239333	565.831	247294	41451.9	cis - 88	142241	2535.09	64857.1	4928.57	system double 30	142339	1439.28	133996	3066.79	184.101	0.184725	48.2836	0.0219635	99.7544	0.0136667	0.0112222	0.38183	-6.34314	0.00143737
	trans - 31	216837	579.45	1349.65	218.245	cis - 142	182751	25321.3	8596.66	835.662	system double 31	182800	1201.1	9015.56	1341.21	1.00476	0.162474	6.39987	0.00372402	6.71173	0.00597695	1.04376	0.1722	0.622459	0.560924
	trans - 32	228198	918.649	984.848	1264.22	cis - 17	39013.1	53.9452	1280	209.443	system double 32	39025.9	1302.76	36053.3	3038.88	0.733181	0.941162	0.952909	0.000933354	26.8402	0.0135424	38.417	26.5094	3.45736	0.0180936
	trans - 33	228876	1261.71	247155	5271.35	cis - 59	92142.9	583.333	36238.1	4130.95	system double 33	92075.5	1098.98	85930.3	1513.02	183.997	0.0234911	26.9778	0.018409	63.9717	0.00674256	0.0128875	0.0560702	-43.1231	1.26548e-07
	trans - 34	228873	1595.18	1264.71	612.725	cis - 149	206754	27310.6	16355.1	2364.86	system double 34	206805	1629.47	16792.4	340.936	0.941523	0.45615	12.1757	0.0105387	12.5013	0.00151934	1.09051	0.488802	0.453542	0.669164
	trans - 35	236449	846.79	797.17	245.192	cis - 90	147219	847.167	7459.46	6189.19	system double 35	147132	833.513	56768.9	6439.3	0.593461	0.182536	5.55327	0.0275813	42.2622	0.0286959	12.8236	2.40577	12.0385	6.98004e-05
	trans - 36	211836	827.691	24828.7	3622.25	cis - 114	234303	18835.9	27558.1	3555.99	system double 36	234291	1755.56	16797.4	1369.96	18.484	2.69662	20.5159	0.0158468	12.505	0.00610505	0.0329759	1.64369	-1.44109	0.20912
	trans - 37	219507	460.196	1479.89	440.694	cis - 5	205765	183.59	5542.86	471.429	system double 37	205829	843.449	54588.7	4889.24	1.10172	0.328079	4.12644	0.00210086	40.6391	0.0217883	8.93922	3.23201	6.017	0.0018229
	trans - 38	234356	913.88	932.362	338.517	cis - 40	67920.2	1693.02	1874.38	690.025	system double 38	67891.2	1523.52	19436	922.196	0.694107	0.252013	1.3954	0.003075	14.4693	0.00410965	14.939	2.61398	13.0619	4.69225e-05
	trans - 39	217558	1309.88	1560.98	429.042	cis - 11	184806	161.717	873.153	446.902	system double 39	184853	1419.39	75732.6	1416.5	1.16208	0.319405	0.650028	0.00199156	56.3799	0.00631244	74.6371	27.7036	6.51082	0.00127696
	trans - 40	216302	1377.86	652.33	424.236	cis - 53	86217.4	5195.42	4387.1	903.226	system double 40	86191.3	597.272	41880.6	3281.96	0.485634	0.315827	3.26602	0.00402511	31.1784	0.0146256	19.6574	3.02605	15.1026	2.30601e-05
	trans - 41	236255	1028.45	1266.19	456.254	cis - 107	206352	244.841	91202.4	7353.24	system double 41	206292	876.308	52140.8	2958.07	0.942626	0.339663	67.8966	0.0327687	38.8168	0.0131823	0.606502	1.3633	-0.707012	0.511138
	trans - 42	210797	744.856	970.37	428.796	cis - 125	129651	16568.8	7370.42	1065.76	system double 42	129565	1661.39	6730.6	2121.95	0.722402	0.319221	5.48698	0.00474941	5.01067	0.00945621	1.2641	0.293375	2.20509	0.0785886
	trans - 43	216399	1340.37	962.963	417.846	cis - 67	102454	1156.86	8400	1020	system double 43	102529	457.202	9016.97	873.352	0.716888	0.31107	6.25347	0.0045455	6.71277	0.00389198	1.49737	0.33662	3.61924	0.0152317
	trans - 44	212210	1710.14	1888.32	421.147	cis - 50	83243.2	26.8099	6277.78	991.667	system double 44	83234.7	908.501	6535.36	843.851	1.40578	0.313528	4.67356	0.00441923	4.86532	0.00376051	0.740535	0.326751	-1.94508	0.109357
	trans - 45	222777	1359.02	1704.48	448.987	cis - 145	179999	20124.6	22300.4	2646.43	system double 45	180060	701.681	25281.7	705.587	1.26892	0.334253	16.6018	0.0117935	18.8213	0.00314436	0.893428	0.417366	-0.625465	0.559102
	trans - 46	236934	1214.93	1362.51	538.655	cis - 27	56415.7	1631.38	593.75	125.73	system double 46	56428.4	1001.15	911.187	368.78	1.01434	0.401008	0.442023	0.0005603	0.678343	0.00164342	1.51294	0.61541	2.04164	0.0966669
	trans - 47	240900	1526.82	103020	4792.72	cis - 9	210122	47.619	598.309	213.214	system double 47	210221	1143.27	7089.61	925.075	76.694	3.56799	0.445417	0.000950158	5.27793	0.00412247	0.154502	42.2786	-0.0489855	0.962827
	trans - 48	220344	1644.91	1012.35	494.676	cis - 78	117759	966.747	25604.7	3282.77	system double 48	117823	1435.9	22865.5	733.608	0.753651	0.368266	19.0616	0.0146292	17.0225	0.00326923	1.18493	0.466194	0.971653	0.375849
	trans - 49	218203	1023.52	65604.2	1413.09	cis - 10	14377.3	101.045	3442.02	374.79	system double 49	14361.2	755.676	3968.07	296.895	48.8397	1.05199	2.56244	0.0016702	2.95407	0.00132307	0.0236044	1.21277	-1.97208	0.105643
	trans - 50	211325	1550.89	14112.2	627.862	cis - 2	214108	155.82	1000	437.335	system double 50	214141	1592.61	59583.7	2994.51	10.506	0.467418	0.74446	0.00194893	44.3577	0.0133447	5.67139	27.8505	0.410855	0.698194
	trans - 51	242242	775.769	247879	6617.56	cis - 110	227769	2846.45	38237.3	4147.96	system double 51	227716	671.536	213104	11362.8	184.536	0.0294903	28.4661	0.0184849	158.647	0.0506368	0.030201	0.165122	-14.3865	2.92625e-05
	trans - 52	234658	1784.31	1339.51	454.197	cis - 74	114243	329.044	116731	17360.6	system double 52	114248	1475.31	7071.17	770.799	0.997209	0.338132	86.9019	0.0773654	5.26421	0.00343496	0.060746	0.40892	-5.62626	0.00245699
	trans - 53	229560	708.808	257704	4166.01	cis - 150	66259.1	1385.99	10999.6	968.032	system double 53	66169.6	947.469	68921.9	1896.44	191.85	0.0185653	8.1888	0.00431391	51.3096	0.00845124	0.03266	0.116332	-20.3683	5.27693e-06
	trans - 54	235463	1399.03	1597.66	441.493	cis - 109	239229	2419.63	234964	12116.1	system double 54	239275	757.153	45269.2	3519.19	1.18939	0.328674	174.922	0.0539937	33.7011	0.0156828	0.161985	1.53121	-1.34058	0.237739
	trans - 55	235679	683.986	1504.07	553.145	cis - 104	177839	1010.42	6666.67	1051.85	system double 55	177931	546.063	57640.9	3738.25	1.11972	0.411794	4.96307	0.00468744	42.9113	0.016659	7.72171	3.56496	4.6185	0.00574319
	trans - 56	214254	616.699	903.553	363.857	cis - 134	28004.9	2792.74	14019	1753.56	system double 56	27923	1049.3	66976	1173.05	0.67266	0.270877	10.4366	0.00781451	49.861	0.00522753	7.10241	1.41784	10.5426	0.00013261
	trans - 57	232450	1740.22	12392.3	454.23	cis - 49	82027.4	299.787	5632.26	741.935	system double 57	82086.7	878.397	13065.6	1068.78	9.22558	0.338156	4.19299	0.00330634	9.72679	0.00476288	0.25145	0.784454	-2.33738	0.0665969
	trans - 58	212252	533.638	1521.28	350.699	cis - 144	75739.7	5613.65	16224.9	1354.41	system double 58	75675.3	1656.36	27920.8	2665.8	1.13253	0.261081	12.0788	0.00603576	20.7859	0.0118798	1.51948	0.46274	2.74984	0.0403179
	trans - 59	211490	1478.79	724.771	308.81	cis - 84	131147	249.942	6368.07	650.84	system double 59	131214	735.459	36508.1	2039.67	0.539563	0.229897	4.74077	0.00290038	27.1788	0.00908951	10.6253	1.32608	17.7795	1.03299e-05
	trans - 60	228253	1581	1128.53	438.409	cis - 65	98485.7	1030.56	43371.4	3214.29	system double 60	98465.4	1284.8	36108.5	3109.19	0.840143	0.326378	32.2883	0.014324	26.8813	0.0138557	0.990951	0.532809	-0.0415992	0.968428
	trans - 61	221227	460.221	24587.6	2892.17	cis - 137	240612	26311.3	19655.8	2137.74	system double 61	240633	1188.59	120666	3445.85	18.3045	2.15311	14.6329	0.00952657	89.8313	0.015356	0.335381	13.218	-0.123164	0.906775
	trans - 62	213631	1064.41	235144	5858.97	cis - 126	77888.9	3535.8	24080.5	3555.19	system double 62	77814.1	1562.06	78949.7	5089.09	175.056	0.0261097	17.927	0.0158432	58.7749	0.0226789	0.0187287	0.0857677	-28.0247	1.08316e-06
	trans - 63	229187	1438.5	1329.07	579.136	cis - 85	132839	1413.14	6004.6	485.711	system double 63	132886	1035.08	142529	649.429	0.989443	0.431144	4.47018	0.00216451	106.107	0.00289409	23.99	10.2366	5.50123	0.00271242
	trans - 64	212503	825.604	41730.2	762.235	cis - 31	58805.2	1454.55	15557.8	1280.76	system double 64	58857.5	508.946	36188.5	2356.57	31.0664	0.567454	11.5822	0.00570753	26.9409	0.0105017	0.0748738	1.31994	-1.71681	0.146665
	trans - 65	243983	910.896	1259.26	327.442	cis - 6	196157	172.043	7530.49	807.622	system double 65	196211	1439.76	46131	3007.36	0.937469	0.243767	5.60615	0.00359906	34.3427	0.0134019	6.53451	1.49911	9.04321	0.00027632
	trans - 66	230635	1082.77	1350.64	547.509	cis - 115	246501	5201.98	9518.02	964.83	system double 66	246448	808.129	10069.6	450.112	1.0055	0.407599	7.08579	0.00429964	7.49645	0.00200586	1.05217	0.432412	0.29552	0.779475
	trans - 67	231787	972.43	1181.56	481.471	cis - 81	125689	391.304	5897.01	688.538	system double 68	125785	483.157	14744.4	949.975	0.879624	0.358436	4.39009	0.00306838	10.9766	0.00423344	2.84249	0.897023	5.03126	0.00399654
	trans - 68	226965	755.523	231565	9146.97	cis - 96	166564	188.259	45077	3164.63	system double 67	166543	591.695	176014	2798.54	172.391	0.0407623	33.558	0.0141028	131.036	0.0124713	0.0226505	0.159527	-15.0069	2.37904e-05
	trans - 69	231103	966.809	258504	2635.42	cis - 63	94845	212.213	64869.9	2429.59	system double 69	94757.2	538.285	64440.5	2518.74	192.446	0.0117444	48.293	0.0108271	47.9734	0.0112244	0.00516186	0.0119748	-203.498	5.43739e-11
	trans - 70	210097	898.589	1369.26	334.579	cis - 122	209134	10716.2	15076	2143.01	system double 70	209090	554.124	34163	1733.47	1.01936	0.249081	11.2234	0.00955005	25.433	0.00772499	2.22302	0.612664	4.88974	0.00451457
	trans - 71	226744	1254.01	130441	1958.49	cis - 143	186920	20923.8	22952.6	1884.63	system double 72	186859	509.558	11434.2	778.178	97.1079	1.45802	17.0873	0.00839861	8.51231	0.00346785	0.00513002	0.726334	-3.3551	0.0202158
	trans - 72	243741	859.62	1308.87	478.482	cis - 98	170196	2319.05	6800	714.286	system double 71	170114	1615.03	7678.34	2078.2	0.974402	0.356211	5.06233	0.00318312	5.71622	0.00926121	1.15883	0.402659	0.966214	0.378313
	trans - 73	226053	589.367	13382.8	479.563	cis - 14	216010	19.0123	6577.61	901.544	system double 73	216045	1702.71	72494.3	615.08	9.96297	0.357015	4.89677	0.00401761	53.9692	0.00274102	1.10623	3.93487	0.0661322	0.949835
	trans - 74	241840	904.579	1458.53	491.859	cis - 7	7568.66	15.0538	5108.57	562.857	system double 74	7593.94	452.625	41546.3	2153.98	1.08582	0.366169	3.80313	0.0025083	30.9296	0.00959892	7.4899	2.97879	5.3367	0.00309759
	trans - 75	235959	1264.16	1541.19	379.657	cis - 138	206243	376.421	13048.8	1500.71	system double 75	206192	582.139	13760.4	690.299	1.14735	0.28264	9.71429	0.0066877	10.2441	0.00307623	0.919104	0.303977	-0.651873	0.543256
	trans - 76	223694	1343.58	725.389	216.246	cis - 46	175102	1866.67	600	391.104	system double 76	175019	579.451	166408	5526.06	0.540023	0.160987	0.446676	0.0017429	123.885	0.0246262	513.584	44.6511	28.1196	1.06511e-06
	trans - 77	210173	645.086	1226.59	361.739	cis - 29	57771	985.45	6938.17	822.214	system double 77	57821.2	579.101	6177.75	1480.67	0.913147	0.2693	5.16519	0.00366409	4.59909	0.00659842	0.97509	0.240498	-0.253706	0.809825
	trans - 78	229610	782.499	741.595	237.83	cis - 62	94255.5	392.628	93722.2	6875	system double 78	94268.2	879.036	46710.8	4437	0.552088	0.177055	69.7725	0.0306375	34.7744	0.0197729	0.902748	1.93178	-0.123315	0.906661
	trans - 79	224285	745.498	29667.6	2190.11	cis - 131	11720.5	1265.13	7333.28	701.453	system double 79	11677.7	909.521	46992.6	5101.42	22.0864	1.63045	5.45933	0.00312593	34.9841	0.0227338	0.29014	10.4481	-0.166422	0.874346
	trans - 80	227488	1004.59	1323.98	383.27	cis - 51	85349.7	488.021	22600.8	2237.3	system double 80	85441.7	480.438	57058.5	3841.64	0.98565	0.285329	16.8254	0.00997023	42.4778	0.0171197	2.56138	0.838766	4.55978	0.00605815
	trans - 81	243438	1630.28	844.76	373.68	cis - 39	67569.6	1486.33	6370	1032.5	system double 81	67530	669.326	28923.2	2112.19	0.62889	0.27819	4.74221	0.0046012	21.5321	0.00941269	7.2199	1.27292	11.969	7.17904e-05
	trans - 82	225118	1562.64	768.021	282.38	cis - 42	70141.3	1643.05	777.094	475.648	system double 82	70123	655.042	29852.7	2087.98	0.571761	0.210221	0.578515	0.00211966	22.2242	0.0093048	67.1887	8.07628	20.0746	5.67005e-06
	trans - 83	222995	1507.17	987.012	207.585	cis - 93	156859	771.584	1126.89	579.645	system double 83	156821	630.602	33614.2	1777.51	0.734791	0.154539	0.838925	0.00258311	25.0244	0.00792123	40.5954	4.61062	21.0359	4.4982e-06
	trans - 84	226066	1324.65	24077.6	1721.14	cis - 136	227430	2205.69	17471.7	2584.32	system double 84	227367	1253.65	129195	12755.7	17.9248	1.28132	13.007	0.0115167	96.1805	0.0568439	0.41253	9.47493	-0.151875	0.885224
	trans - 85	241037	1062.61	1779.91	496.139	cis - 113	194190	27423.9	41987.4	4404.92	system double 85	194153	1710.32	7351.69	996.064	1.32507	0.369356	31.2579	0.0196299	5.47304	0.00443883	0.132139	0.103712	-20.4972	5.11463e-06
	trans - 86	224487	855.111	1300.43	395.033	cis - 103	176193	1207.88	6722.11	739.986	system double 86	176204	1623.34	96906.4	4059.85	0.968121	0.294086	5.00434	0.00329765	72.143	0.0180922	14.8908	4.24669	8.0122	0.000489396
	trans - 87	243424	1290.22	772.039	244.329	cis - 28	57512.6	2215.69	500	352.336	system double 88	57469.6	1219.57	46579.7	3915.24	0.574752	0.181893	0.37223	0.00157014	34.6767	0.0174478	162.086	16.9455	23.2851	2.71873e-06
	trans - 88	222302	500.541	33829.4	3261.9	cis - 99	171694	1869.05	6711.69	790.827	system double 87	171773	1260.12	51256.3	6098.36	25.1846	2.42836	4.99659	0.00352421	38.1583	0.0271766	0.303235	18.545	-0.092031	0.930247
	trans - 89	238821	1244.86	1664.48	594.672	cis - 55	87285.7	2541.67	5277.78	397.96	system double 89	87360	989.495	5567.68	981.927	1.23914	0.44271	3.9291	0.00177345	4.14492	0.00437583	0.851338	0.467066	-0.779647	0.470873
	trans - 90	230328	505.868	986.228	324.528	cis - 71	108650	1160.92	2611.49	480.46	system double 90	108612	1753.38	35638.6	4196.15	0.734208	0.241598	1.94415	0.00214111	26.5315	0.0186996	18.5871	3.29798	13.0624	4.69136e-05
	trans - 91	221159	525.158	1405.56	426.146	cis - 73	114231	241.843	3065.55	419.328	system double 91	114322	1557.27	3797.35	353.489	1.04639	0.317249	2.28218	0.00186868	2.82698	0.00157528	1.18381	0.393015	1.1456	0.303816
	trans - 92	228082	1386.4	1634.51	498.676	cis - 132	150805	4119.27	16161.8	1420.52	system double 92	150837	919.911	108474	3644.61	1.21683	0.371244	12.0318	0.00633036	80.7547	0.0162417	5.51581	2.52688	4.3775	0.00717138
	trans - 93	214750	1437.61	645.268	380.575	cis - 33	60558.4	735.992	7458.97	685.256	system double 93	60528.2	1563.97	26782	2125.33	0.480376	0.283323	5.55291	0.00305375	19.9381	0.00947124	7.47449	1.02516	15.4699	2.04933e-05
	trans - 94	210947	418.314	1150.69	430.514	cis - 146	168571	11240	32747	4482.09	system double 94	168558	609.845	133731	13987.7	0.856646	0.320501	24.3788	0.0199738	99.5572	0.0623346	4.76715	2.66487	3.46267	0.0179905
	trans - 95	238125	888.876	31447.5	2178.73	cis - 79	121497	1036.83	1676.47	378.148	system double 95	121501	584.746	34663	3840.41	23.4114	1.62198	1.24807	0.00168517	25.8052	0.0171143	0.883168	33.5363	-0.0085334	0.993521
	trans - 96	220271	827.059	1520.92	455.73	cis - 87	139294	870.192	64825.6	4281.4	system double 96	139381	1495.3	88988.1	4122.21	1.13227	0.339273	48.2601	0.0190795	66.2481	0.0183701	1.21237	1.20958	0.43007	0.68505
	trans - 97	244089	1254.56	1289.04	387.092	cis - 60	92854.1	408.462	9730.77	917.308	system double 97	92812.6	548.673	7356.51	3096.75	0.959642	0.288175	7.24417	0.00408786	5.47663	0.0138003	0.787799	0.219116	-2.37219	0.0637793
	trans - 98	242565	780.971	1411.31	112.612	cis - 25	46095.2	1018.52	36051.3	4274.36	system double 98	46116.8	1097.8	89272.9	5852.56	1.05067	0.0838352	26.8387	0.0190481	66.4601	0.0260812	2.35686	1.22265	2.71838	0.0418558
	trans - 99	235183	476.602	22256.6	1952.68	cis - 15	17980.8	85.2827	1033.33	346.012	system double 99	17946.8	1326.18	10328.8	1864.75	16.5692	1.45369	0.769276	0.00154196	7.68935	0.00831	0.603264	14.5305	-0.0668802	0.949269
	trans - 100	210302	500.566	743.521	358.627	cis - 147	115399	8796.08	36578.7	3119.16	system double 100	115478	1661.41	25277.9	1665.79	0.553522	0.266984	27.2314	0.0139001	18.8184	0.00742337	1.24847	0.50731	1.19971	0.283995
	trans - 101	236448	900.88	736.2	362.107	cis - 68	105354	1982.66	1210.69	376.767	system double 101	105284	1242.75	54438	3270.86	0.548072	0.269574	0.901307	0.00167901	40.5269	0.0145762	82.0415	12.122	16.3761	1.54903e-05
	trans - 102	241195	971.424	1545.13	415.452	cis - 129	50483.2	5436	43799.9	3047.37	system double 102	50390.5	845.095	44540.3	405.294	1.15029	0.309288	32.6073	0.0135802	33.1585	0.00180614	0.884043	0.502161	-0.565627	0.596086
	trans - 104	212130	1351.4	1740.74	361.413	cis - 118	228175	1539.69	6216.59	468.084	system double 103	228104	1559.42	6907.97	1470.53	1.29592	0.269058	4.62801	0.00208595	5.14271	0.00655322	0.857475	0.299097	-1.16723	0.295751
	trans - 103	241008	1373	9782.42	673.553	cis - 106	199257	1233.33	1166.67	250	system double 104	199319	649.599	45291	3298.59	7.28262	0.501433	0.868537	0.00111409	33.7174	0.0146997	5.33062	19.4661	0.544938	0.609212
	trans - 105	212543	1010.37	31204.7	3179.71	cis - 69	108071	2069.44	25476.2	2021.43	system double 105	108060	1074.55	90380.5	2418.99	23.2307	2.36717	18.966	0.00900823	67.2847	0.0107799	0.152714	8.39791	-0.247135	0.814631
	trans - 106	226135	801.473	725.795	474.301	cis - 44	72300.8	526.316	62142.6	7103.23	system double 106	72264.3	769.726	12155.7	999.297	0.540326	0.353098	46.2627	0.0316546	9.04943	0.00445324	0.362022	0.534635	-2.92297	0.0329002
	trans - 107	221601	1389.33	11440.8	411.734	cis - 24	39667.9	843.75	45071.4	3514.34	system double 108	39605.1	1464.01	46538.3	3392.54	8.51726	0.30652	33.5539	0.0156612	34.6459	0.0151184	0.12123	0.322843	-6.66745	0.00114589
	trans - 108	221446	1381.19	897.989	453.091	cis - 89	145546	2705.88	39145.4	3323.45	system double 107	145641	1000.53	32692.6	1072.25	0.668517	0.337308	29.1422	0.0148105	24.3383	0.00477833	1.24927	0.608352	1.00366	0.361611
	trans - 109	235917	1560.87	1385.73	583.938	cis - 80	122590	429.545	126421	87735.7	system double 110	122514	514.514	18367.1	1475.85	1.03162	0.434719	94.1154	0.390982	13.6736	0.00657692	0.140832	5.18266	-0.40607	0.701486
	trans - 110	236419	808.287	14706	1076.41	cis - 20	27772.9	544.266	7142.86	738.095	system double 109	27784.9	538.021	32227.3	3025.95	10.948	0.801343	5.31757	0.00328922	23.9919	0.0134847	0.412113	3.61552	-0.398289	0.706855
	trans - 111	221567	1724.71	10718	1052.28	cis - 22	34625	708.333	8835.69	927.441	system double 111	34650.5	1131.21	42928.2	2163.51	7.9791	0.783378	6.57782	0.00413302	31.9584	0.00964138	0.608904	3.80608	-0.251699	0.811292
	trans - 112	213788	1791.69	1238.47	452.867	cis - 94	157702	451.389	9391.36	816.262	system double 112	157754	1485.8	50353.8	3158.27	0.921992	0.337141	6.9915	0.00363756	37.4864	0.0140744	5.81536	1.8137	6.50338	0.00128362
	trans - 113	237289	709.783	1516.77	330.911	cis - 105	185638	977.778	4750	681.25	system double 113	185735	1645.98	77892.3	4895.91	1.12917	0.24635	3.53619	0.0030359	57.9878	0.021818	14.5225	4.04276	8.19321	0.000440656
	trans - 114	227227	568.09	24277.3	1016.42	cis - 133	238749	31006.5	12502.3	1124.51	system double 115	238772	1379.05	18270.7	885.27	18.0735	0.756681	9.30744	0.00501121	13.6018	0.00394509	0.080858	1.10581	-2.036	0.0973641
	trans - 115	244058	717.709	880.218	317.188	cis - 130	10356	1426.07	5532.32	699.066	system double 114	10319	513.733	66449.7	1052.85	0.655287	0.236134	4.11859	0.0031153	49.4692	0.00469187	18.3297	2.84598	14.9153	2.45158e-05
	trans - 116	229630	803.562	36968.6	5737.71	cis - 48	76232.1	2177.08	15857.1	1464.29	system double 116	76217.4	1574.24	45694.8	2318.46	27.5217	4.2715	11.805	0.0065254	34.0179	0.0103319	0.104705	12.309	-0.178164	0.865588
	trans - 117	240637	393.795	1495.87	191.721	cis - 119	134022	17317.7	33455.2	3666.39	system double 117	133947	695.473	40014.8	4558.44	1.11362	0.142729	24.906	0.0163388	29.7894	0.0203141	1.07404	0.469223	0.386531	0.715006
	trans - 118	230950	1082.65	1240.75	453.399	cis - 108	226449	3404.76	237862	5897.68	system double 118	226393	1159.81	214289	992.786	0.923691	0.337538	177.078	0.0262822	159.529	0.00442422	0.975322	4.54934	-0.0132873	0.989912
	trans - 119	210600	971.383	1167.67	444.219	cis - 12	104913	23.1481	4002.3	533.908	system double 119	104884	1361.32	94557.4	8289.39	0.869287	0.330703	2.97955	0.00237929	70.3942	0.0369406	27.1783	7.81551	8.20465	0.000437773
	trans - 120	219692	1731.22	14693.2	768.637	cis - 127	135985	12173.2	3010.05	546.119	system double 120	136055	733.207	8350.85	430.169	10.9385	0.57222	2.24086	0.00243371	6.21688	0.00191699	0.25363	1.58752	-1.15162	0.30155
	trans - 121	224231	725.289	1405.94	392.513	cis - 135	204112	25593.9	6384	887.64	system double 121	204167	1030.64	97086.4	3426.56	1.04667	0.29221	4.75264	0.00395565	72.277	0.01527	14.5297	4.45225	7.4436	0.000690035
	trans - 122	222998	697.208	10266.5	1394.87	cis - 101	174350	470.833	45038.5	5137	system double 122	174342	507.633	49365.7	1048.98	7.643	1.03842	33.5293	0.0228924	36.7508	0.00467466	0.143409	1.1435	-1.83489	0.125972
	trans - 123	238699	531.067	1268.77	477.727	cis - 116	27175.3	1575.48	13754.8	1845.41	system double 123	27216.8	1074.5	43178.9	2056.72	0.944545	0.355649	10.2399	0.00822381	32.145	0.00916552	3.32348	1.15099	4.94473	0.00430445
	trans - 124	222279	1200.74	10252	1065.2	cis - 102	175322	1468.46	44967.7	5146.94	system double 124	175304	1426.38	13449.2	1213.49	7.63222	0.792997	33.4767	0.0229367	10.0124	0.00540777	0.0391872	0.239075	-9.84421	0.000184308
	trans - 125	241286	674.915	966.636	314.068	cis - 111	65407.2	21387.3	20582.5	2469.08	system double 125	65462.4	1094.62	31146.7	2518.64	0.719622	0.233811	15.3229	0.0110031	23.1875	0.011224	2.10285	0.500885	5.3933	0.00295827
	trans - 126	235032	1225.66	1255.78	490.996	cis - 86	133024	772.904	5307.53	660.215	system double 126	132997	1263.51	89800.3	91035.2	0.934881	0.365527	3.95124	0.00294216	66.8528	0.405686	18.0979	6.18906	6.76698	0.00107085
	trans - 127	215212	560.562	969.619	237.327	cis - 30	97943.1	1790.34	1454.55	406.6	system double 127	97992.6	1642.48	94078.1	1450.28	0.721843	0.176681	1.08285	0.00181196	70.0374	0.00646297	89.6022	11.4288	18.9897	7.46265e-06
	trans - 128	228816	1115.34	207266	12364.2	cis - 148	250021	4515.48	49146.8	3404.95	system double 128	249984	717.267	34047.6	3820.02	154.301	9.20466	36.5878	0.0151737	25.3471	0.0170234	0.00448976	6.37676	-0.382403	0.717878
	trans - 129	215560	752.299	20368	1110.92	cis - 56	87602.5	1550.72	8432.43	797.297	system double 129	87564.2	967.178	21051.2	2289.89	15.1632	0.827037	6.27761	0.00355305	15.6718	0.0102046	0.164639	2.06466	-0.991062	0.367162
	trans - 130	232442	1720.32	1430.99	430.293	cis - 34	63322.9	698.027	851.852	370.481	system double 130	63405.2	747.111	78568.1	4090.74	1.06532	0.320336	0.63417	0.001651	58.4909	0.0182298	86.5771	29.5454	7.09484	0.000861637
	trans - 131	220779	1466.1	1356.79	477.528	cis - 58	91828.6	433.333	3520	620	system double 131	91907.9	491.554	32667.1	3375.12	1.01008	0.355501	2.6205	0.00276295	24.3194	0.0150408	9.18783	3.29987	6.07781	0.00174256
	trans - 132	240139	1752.69	1389.38	304.367	cis - 52	86055.1	484.524	5172.12	22.7596	system double 132	86149.3	462.525	41715.1	1226.16	1.03433	0.226589	3.85044	0.000101425	31.0552	0.00546422	7.79765	1.82753	9.11108	0.000266669
	trans - 133	239922	1543.56	1233.1	392.307	cis - 41	69089.3	916.667	30336.6	3684.15	system double 133	69058.4	679.889	86129.1	9577.46	0.91799	0.292057	22.5844	0.0164179	64.1197	0.0426807	3.09275	1.41513	3.6224	0.0151812
	trans - 134	228645	883.061	1370.95	346.08	cis - 100	173429	615.385	6563.44	692.473	system double 134	173479	657.344	50104.5	5773.3	1.02062	0.257643	4.88622	0.00308592	37.3008	0.0257279	7.47965	1.97005	8.05656	0.000476883
	trans - 135	213201	970.833	814.213	302.07	cis - 141	199289	28004.1	26625.9	1960.9	system double 135	199220	1749.88	15258.1	3095.62	0.606149	0.224879	19.8219	0.00873849	11.359	0.0137952	0.9454	0.208385	-0.641808	0.54926
	trans - 136	229832	1157.98	13039.8	18621.6	cis - 95	159527	2161.9	7621.62	810.811	system double 136	159537	1693.96	955.349	467.126	9.70764	13.863	5.67399	0.00361327	0.711219	0.00208169	0.0129122	1.73769	-1.39142	0.222831
	trans - 137	222885	472.496	707.42	233.401	cis - 120	123823	10142.2	45133.7	5409.47	system double 137	123841	1538.79	46891.4	3739.72	0.526646	0.173758	33.6003	0.0241066	34.9088	0.0166656	1.97275	1.60807	1.48174	0.198502
	trans - 138	238957	404.428	1481.41	435.527	cis - 140	49756.3	4935.6	30006.4	2205.14	system double 138	49681.1	1098.56	37861.6	2957.14	1.10285	0.324233	22.3386	0.00982692	28.1864	0.0131781	1.14411	0.480052	0.735307	0.495174
	trans - 139	243558	617.833	24609.7	2185.45	cis - 13	15498.1	40.5405	1903.23	495.326	system double 139	15552.5	908.869	1555.86	560.8	18.3209	1.62698	1.41688	0.00220735	1.15827	0.00249913	0.0446202	1.33003	-1.75951	0.138811
	trans - 140	213173	692.115	1403.05	482.203	cis - 128	151539	20298.3	20494.5	1976.72	system double 140	151613	870.479	54989.1	5640.43	1.04451	0.358981	15.2573	0.00880899	40.9372	0.0251358	2.56877	1.0232	3.75557	0.0132176
	trans - 141	241036	1398.87	1481.35	412.814	cis - 82	127548	2138.89	28757.3	2286.88	system double 141	127487	776.284	29502.3	2392.56	1.1028	0.307324	21.4086	0.0101912	21.9633	0.0106621	0.930274	0.374968	-0.455485	0.667858
	trans - 142	222971	1575.8	8500.73	1794.98	cis - 66	99149.7	4448.41	88988.1	7179.22	system double 142	99195.5	1528.95	89266	3635.79	6.32845	1.33629	66.2481	0.0319932	66.455	0.0162024	0.15851	1.38193	-1.49156	0.196017
	trans - 143	233011	719.585	1845.12	431.859	cis - 21	131720	967.775	7668.57	602.857	system double 143	131817	1228.47	121870	1002.87	1.37362	0.321502	5.70895	0.00268655	90.7272	0.00446915	11.5695	5.11242	5.06413	0.00388636
	trans - 144	221241	1669.38	29843.6	3261.02	cis - 3	184510	133.925	1131.75	408.802	system double 144	184557	1686.92	99269.3	7583.27	22.2174	2.4277	0.84254	0.00182177	73.9021	0.0337939	3.94797	212.942	0.0339107	0.97426
	trans - 145	211296	1605.39	1271.59	479.287	cis - 70	108489	3835.97	6549.36	500.755	system double 145	108501	1665.98	34006.9	2898.88	0.94665	0.35681	4.87574	0.00223155	25.3168	0.0129185	5.48502	1.85366	5.92665	0.00195047
	trans - 147	237988	1132.75	724.871	352.864	cis - 83	129216	429.444	65028.6	5685.71	system double 147	129188	1097.33	22073.9	2119.31	0.539638	0.262693	48.4112	0.0253376	16.4332	0.00944443	0.629033	0.776723	-1.16989	0.294771
	trans - 146	233959	1317.43	2470.5	357.243	cis - 43	72276.2	1091.95	22497.9	2165.01	system double 146	72315	614.91	81917.6	5125.98	1.83919	0.265953	16.7488	0.00964807	60.9844	0.0228433	1.97975	1.01985	2.35318	0.0653018
	trans - 148	239220	1405.65	1243.87	469.644	cis - 23	39457.7	431.973	7030.3	460.606	system double 148	39464.4	1798.32	3285.27	254.039	0.926008	0.349631	5.23378	0.00205263	2.44575	0.00113209	0.50464	0.163473	-7.42249	0.000699196
	trans - 149	237673	1578.22	130821	240.036	cis - 16	18676.7	403.509	750	229.613	system double 149	18592.3	715.188	95058.2	3236.8	97.3914	0.178697	0.558345	0.00102324	70.7671	0.0144244	1.30139	22.6489	0.0325957	0.975258
	trans - 150	237562	1334.52	1513.47	504.409	cis - 1	93694.8	94.697	633.333	449.301	system double 150	93777.4	1316.11	81660	388.589	1.12672	0.375512	0.471492	0.00200225	60.7926	0.0017317	114.435	48.4175	5.73881	0.00225092
