# Supplementary material for: Regulatory network structure determines patterns of intermolecular epistasis
Source: eLife. 2017 Nov 13;6:e28921. doi: 10.7554/eLife.28921 (PMC5699867; doi:10.7554/eLife.28921)
Supplement: Figure 3—source data 3. — Flow cytometry data obtained for 60 double mutants and their corresponding single mutants, in the absence and in the presence of CI, was used to quantify gene expression noise. The data provided here are shown in Figure 3—figure supplements 2, 3 and 4. [file elife-28921-fig3-data3.xlsx]

## Sheet: Sheet1
gene expression noise in 60 random system double mutants (sampled from the library of 150) and the corresponding single mutants in cis and trans, measured in the presence of CI													statistical analyses of gene expression noise
	double mutant identity	CV replicate 1	CV replicate 2	CV replicate 3	CV replicate 4	CV replicate 5	CV replicate 6	CV replicate 7	CV replicate 8	CV replicate 9	CV replicate 10		a) comparison across all isolates, present in this library and those shown in Figure 2 - Source Data 1
	system double 3	37.68	38.64	36.82	39.12	36.78	35.52	39.37	36.59	40.47	38.71
	system double 5	39.07	38.13	40.33	39.57	37.87	35.01	36.34	35.94	36.54	39.02		isolates with no fluorescence			isolates with fluorescence
	system double 11	38.07	35.84	39.19	35.82	37.89	38.06	39.79	38.31	35.32	39.8		F166,1494 = 0.765	P = 0.746		F180,1620 = 0.485	P = 0.966
	system double 18	39.87	39.94	35.15	40.46	37.43	36.52	38.42	40.25	37.47	37.28
	system double 20	37.92	38.46	37.74	38.91	36.07	39.23	39.81	35.08	35.9	37.91
	system double 23	38.84	38.87	40.29	39.2	36.27	36.07	35.63	36.23	38.2	35.08		b) comparison across all single and double mutants
	system double 32	35.4	40.48	36.44	35.45	37.22	37.08	35.21	38.8	38.21	36.09
	system double 35	35.12	36.8	36.2	38.29	36.61	36.59	38.03	37.04	40.26	37.47		isolates with no fluorescence			isolates with fluorescence
	system double 38	36.14	36.62	39.8	39.46	37.94	38.48	38.42	39.64	38.35	38.06		F83,747 = 0.891	P = 0.59		F95,855 = 1.332	P = 0.174
	system double 39	37.77	37.57	36.68	37.91	38.8	39.32	39.8	39.91	38.88	38.36
	system double 40	35.03	40.33	39.59	40.28	39.8	36.44	36.83	36.51	36.94	38.92
	system double 43	625.39	676.58	415.39	368.2	376.08	418.56	585.6	519.99	553.75	403.11
	system double 76	38.09	35.91	39.73	39.08	37.09	35.66	36.95	36.31	39.16	38.93
	system double 80	35.17	36.21	39.73	38.87	38.35	35.69	37.8	39.55	36.64	36.7
	system double 81	38.36	40.4	36.11	35.68	38.06	38.89	38.6	39.66	38.6	39.26
	system double 82	40.2	39.14	39.37	39.67	37.36	39.79	38.15	38.63	39.09	37.51
	system double 83	39.96	36.74	40.36	39.62	38.44	38.74	38.93	36.05	36.95	40.24
	system double 92	39.2	36.05	36.46	36.85	35.6	39.26	40.36	39.16	37.44	36.91
	system double 93	35.8	36.11	36.01	35.53	38.16	37.05	38.75	38.85	35.37	36.02
	system double 94	38.2	40.22	39.09	36	35.14	36.8	39.98	37.37	38.49	35.52
	system double 101	37.09	36.16	37.26	35.49	35.57	39.32	39.89	38.17	39.5	36.85
	system double 112	39.91	36.4	39.13	37.07	39.68	35.42	38.67	36.5	36.92	36.17
	system double113	39.55	36.97	35.44	35.03	37.05	39.93	35.59	39.92	39.72	37.56
	system double 119	38.06	38.46	39.56	36.74	39.14	37.95	35.09	38.44	40.24	35
	system double 125	37.01	37.21	36.5	37.39	38.59	38.18	38.9	35.88	35.9	37.56
	system double 126	40.33	38.49	37.74	35.37	39.99	36.47	36.47	39.72	35.18	38.94
	system double 127	40.33	37.59	40.18	38.95	37.65	37.43	37.41	37.52	35.96	37.08
	system double 140	39.24	35.41	40.27	37.72	35.39	38.83	38.57	37.08	40.13	37.67
	system double 143	38.66	35.04	38.85	36.02	37.85	36.65	36.53	35.04	35.08	36.82
	system double 150	37.93	36.18	36.42	39.22	36	36.25	36.26	40.01	36.91	39.41
	system double 9	663.4	396.51	320.08	467.01	574.77	674.23	628.85	409.91	365.44	315.09
	system double 10	38.94	38.47	38.14	38.59	38.83	37.32	35.71	36.41	39.14	39.15
	system double 26	38.94	36.09	38.63	36.08	36.7	35.96	37.28	38.89	37.08	36.39
	system double 30	36.56	40.49	39.6	37.5	38.6	37.39	40.25	35.13	37.64	37.56
	system double 33	39.33	37.49	36.68	40.28	39.25	37.43	36.47	39.36	39.9	39.58
	system double 51	39.65	38.34	36.99	40.11	38.73	38.49	36.63	38.03	36.76	35.9
	system double 62	35.96	35.81	39.06	36.6	35.68	36.39	39.31	36.06	36.56	40.45
	system double 124	39.67	39.05	36.97	35.64	36.9	37.36	40.29	40.44	37.32	37.04
	system double 68	39.01	40.12	38.3	37.94	38.57	35	37.72	35.19	36.37	39.05
	system double 69	39.69	36.49	37.79	36.09	36.53	38.03	35.7	38.37	36.64	36.53
	system double 8	36.84	35.84	37.8	36.76	39.65	38.51	36.63	36.28	38.08	37.88
	system double 12	36.56	39.77	38.21	37.32	36.83	38.27	40.33	37.02	40.02	37.86
	system double 13	36.5	35.54	39.03	36.95	39.65	35.96	38.45	35.04	36.48	38.48
	system double 27	40.11	36.8	35.9	39.85	35.85	39.84	37.58	39.5	38.53	37.3
	system double 34	37.11	36.04	37.08	35.83	40.47	37.45	36.73	39.97	39.47	39.69
	system double 41	39.67	36.58	35.47	35.15	36.29	39.45	39.79	39.21	38.54	36.67
	system double 48	36.86	38.85	37.93	36.3	39.63	39.16	39.1	37.56	36.4	37.9
	system double 54	35.85	40	40.42	39.74	35.85	35.12	39.12	37.17	37.15	38.28
	system double 66	582.78	517.51	355.7	525.39	638.05	369.71	380.19	682.26	591.07	393
	system double 73	35.26	36.88	36.5	36.26	38.07	40.45	39.87	37.95	36.13	40.13
	system double 78	39.42	37.1	38.18	38.99	37.15	36.17	35.07	36.54	39.17	39.53
	system double 79	38.78	38.33	38.86	38.79	35.23	39.33	39.59	37.74	37.81	38.29
	system double 89	519.8	484.96	605.85	349.21	660.2	396.37	572.3	414.91	397	506.37
	system double 114	37.32	40.13	35.59	39.04	35.53	35.08	38.75	40.14	36.61	37.61
	system double 128	35.28	40.14	38.38	39.42	37	39.34	38.67	35.9	38.1	36.95
	system double 135	35.96	35.55	36.52	36.4	37.19	36.04	35.09	36.06	37.13	38.77
	system double 137	36.5	37.15	37.67	35.01	35.86	36.36	39	37.52	39.68	37.04
	system double 141	37.31	35.1	37.87	35.72	40.12	36.67	36.06	36.67	39.33	35.48
	system double 147	38.49	39.29	35.2	37.16	40.29	38.43	38.58	37.32	35.68	40.4
	system double 149	35.15	37.81	38.11	36.05	37.32	38.25	37.09	36.96	37.79	38.92
	cis - 139	39.88	37.98	38.54	40.37	39.44	37.86	39.61	36.75	38.31	37.11
	cis - 97	38.06	39.3	37.3	37.24	38.93	36.71	37.84	36.59	35.41	35.88
	cis - 19	38.71	37.45	38.6	38.11	40.09	39.11	39.46	39.76	36.08	39.53
	cis - 36	37.37	38.38	39.18	35.73	36.18	38.33	37.52	36.95	38.8	35.98
	cis - 92	38.44	35.18	37.73	37.59	36.98	39.31	36.36	39.83	39.51	40.06
	cis - 117	35.49	35.7	39.7	39.45	37.61	36.48	36.86	35.78	35.98	38.21
	cis - 17	40.07	35.39	36.97	36.79	35.87	39.61	37.15	35.43	40.02	35.21
	cis - 90	39.8	37.05	39.13	37.32	39.12	36.67	36.64	35.55	36.67	37
	cis - 40	37.01	38.67	38.51	37.36	40.38	35.33	40.43	37.68	39.68	37.63
	cis - 11	38.63	40.26	39.5	35.96	35.33	37.29	39.67	36.25	37.68	39.69
	cis - 53	37.23	35.84	38.11	39.05	40.2	39.57	40.49	36.44	39.36	35.66
	cis - 67	39.03	35.85	36.61	36.08	35.89	35.92	39.63	39.98	39.43	39.3
	cis - 46	37.75	36.52	37.49	37.47	40.38	38.91	37.87	36.22	38.96	39.98
	cis - 51	39.15	35	35.96	35.61	35.87	37.69	36.23	40.09	39.96	36.11
	cis - 39	39.33	38.71	39.04	39.57	39.33	36.58	36.1	36.11	37.01	39.5
	cis - 42	35.22	39.56	37.69	35.36	38.38	40.4	37.16	38.84	36.67	38.97
	cis - 93	39.55	37.53	35.79	35.63	35.21	35.66	39.18	39.07	36.12	38.37
	cis - 132	36.37	37.37	37.76	36.98	35.71	36.93	39.15	38.67	38.53	35.92
	cis - 33	36.84	39.1	35.08	37.84	39.71	35.75	36.41	37.6	36.61	36.68
	cis - 146	39.34	35.78	36.63	39.55	36.01	36.28	35.32	36.73	39.01	40.09
	cis - 68	36.62	35.51	37.67	38.95	37.1	36.3	36.14	37.17	39.83	37.45
	cis - 94	38.19	37.11	36.63	37.15	37.74	40.43	35.74	38.98	35	39.9
	cis - 105	40.45	35.72	37.32	40.12	40.11	37.01	38.43	39.97	36.68	35.43
	cis - 12	36.66	35.99	39.2	35.07	39.61	36.19	38.15	40.32	35.45	38.06
	cis - 111	36.71	36.05	35.67	38.16	38.11	40.23	36.85	35.14	39.84	39.33
	cis - 86	36.49	38.28	35.07	40.5	35.48	40.23	35.38	37.5	39.02	36.7
	cis - 30	38.83	39.29	40.16	40.02	39.57	38.02	40.25	35.04	35.15	35.91
	cis - 128	36.57	36.69	36.51	38.94	35.33	37.55	35.44	37.14	38.58	36.04
	cis - 21	39.03	35.49	39.1	39.42	37.24	37.17	35.58	37.67	36.95	38.51
	cis - 1	423.78	381.1	483.43	572.89	538.09	472.5	463.98	313.07	513.46	548.97
	cis - 112	36.05	38.75	36.85	35.34	40.26	37.33	37.31	37.65	38.72	40.03
	cis - 77	38.28	39.79	36.94	38.7	37.22	40.05	39.75	35.88	38.84	35.15
	cis - 75	35.69	37.7	39.78	35.27	38.31	36.2	38.91	38.04	36.05	39.82
	cis - 88	37.69	38.31	37.08	38.74	38.08	40.24	36.33	39.45	35.07	39.38
	cis - 59	36.23	35.15	39.98	38.46	40.31	36.23	36.73	36.78	38.85	38.97
	cis - 110	35.33	38.95	36.87	35.71	39.04	38.59	38.6	40	40.09	37.89
	cis - 126	38.15	36.09	39.53	40	39.37	35.89	39.06	40.09	39.36	36.96
	cis - 102	39.22	37.14	38.01	36.96	35.06	37.52	36.65	38.74	36.06	38.37
	cis - 96	38.96	40.39	37.16	36.94	35.61	40.12	39.82	37.46	38.29	40.12
	cis - 63	39.37	40.19	40.1	36.27	38.58	39.81	39.97	36.32	38.49	38.77
	cis - 61	37.6	37.4	35.52	36.05	35.71	40.3	40.2	38.02	38.77	35.5
	cis - 54	38.62	36.21	40.29	39.88	37.78	36.34	36.24	37.54	35.28	38.31
	cis - 4	361.17	538.24	605.42	340.41	410.03	683.92	560.96	514.8	613.17	536.27
	cis - 47	37.28	36.3	37.77	36.36	38.14	38.78	37.54	37.97	36.14	39.19
	cis - 149	35.43	39.13	39.8	35.57	38.77	35.67	36.34	35.46	36.31	36.68
	cis - 107	36.24	39.17	37.54	37.51	40.43	39.33	39.98	39.24	38.4	37.54
	cis - 78	39.96	39.92	35.38	37.75	40.46	39.6	35.84	37.73	39.64	35.51
	cis - 109	37.45	35.5	36.63	38.64	36.69	35.31	35.67	38.04	35.38	40.23
	cis - 115	35.87	36.49	38.14	38.1	40.1	40.13	38.32	37.21	35.43	35.71
	cis - 14	36.91	36.68	35.46	35.52	38.33	38.28	37.65	37.92	40.11	37.39
	cis - 62	37.79	35.99	39.04	36.67	38.51	40.48	38.19	38.46	35.75	38.62
	cis - 131	498.92	384.06	426.26	364.34	610.24	645.43	557.35	537.05	402.32	532.78
	cis - 55	40.45	38.01	36.79	38.4	39.01	36.14	35.57	36.72	36.09	36.3
	cis - 133	38.36	38.76	39.7	39.81	36.8	39.53	35.35	39.47	35.24	37.69
	cis - 148	38.19	36.7	39.1	35.9	37.69	36.89	35.4	37.28	36.34	38.54
	cis - 141	39.41	36.37	38.93	35.12	38.9	39.3	36.81	36.06	35.77	38.58
	cis - 120	35.71	40.14	37.03	37.56	36.93	37.77	39.56	35.43	36.37	36.45
	cis - 82	39.68	38.53	35.89	35.74	35.19	39.17	40.19	37.07	39.88	36.19
	cis - 83	39.04	39.3	37.22	35.45	36.48	37.83	35.83	39.91	35.44	35.54
	cis - 16	35.34	37.45	39.11	38.83	36.04	37.24	35.55	38.56	39.48	39.34
	trans - 3	499.96	376.63	616.8	392.27	630.39	669.94	382.97	309.31	524.98	387.63
	trans - 5	658.84	481.5	480.23	352.13	594	427.39	552.53	588.32	545.82	319.85
	trans - 11	485.78	317.92	404.42	455.05	640.17	444.82	624.15	685	674.22	495.17
	trans - 18	411.8	495.72	620.93	306.03	574.08	660.15	694.19	472.12	585.17	416.99
	trans - 20	528.02	566.4	447.21	374.82	455.82	554.62	379.08	495.27	365.18	675.85
	trans - 23	421.46	428.37	362.49	478.32	504.86	359.67	485.38	638.58	381.39	523.57
	trans - 32	639.7	684.1	531.51	675.02	311.68	630.63	664.52	347.86	447.5	699.47
	trans - 35	482.85	519.67	660.38	392.25	450.39	587.34	455.7	695.74	593.03	449.71
	trans - 38	541.68	620.58	644.42	655.04	673.73	560.26	582.06	676.89	460.26	542.63
	trans - 39	599.14	553.2	328.1	692.91	316.29	345.43	642.7	347.36	492.64	467.88
	trans - 40	462.83	543.97	644.63	454.64	670.69	305.94	302.18	317.56	344.66	387.42
	trans - 43	545.85	671.7	312.58	517.82	402.23	534.44	518.2	490.91	415.06	420.32
	trans - 76	602.15	316.25	595.87	595.13	359.52	653.76	497.43	555.12	349.52	424.9
	trans - 80	617.77	310.83	674.04	429.51	313.87	429.38	492.8	492.37	355.47	641.24
	trans - 81	620.46	672.11	567.02	418.49	539.84	341.37	521.04	308.67	609.15	398.65
	trans - 82	353.96	570.91	334.34	378.26	411.91	410.8	562.58	335.47	665.39	650.57
	trans - 83	514.05	342.91	547.02	532.82	339.57	565.25	696.71	354.75	421.17	572.64
	trans - 92	383.85	542.98	615.09	358.61	414.8	310.63	338.19	450.2	641.75	440.07
	trans - 93	452.83	626.96	375.66	466.42	611.86	503.5	698.33	465.48	462.66	623.22
	trans - 94	404.37	487.58	436.93	576.6	566.01	527.8	601.22	520.35	304.16	655.98
	trans - 101	550.93	498.55	620.59	639.6	544.85	698.54	342.96	315.96	685.81	532.18
	trans - 112	470.4	466.65	642.48	445.44	640.1	410.34	503.34	626.52	435.88	622.76
	trans - 113	402.31	480.45	485.89	600.78	590.59	346.69	593.42	605.92	329.37	631.46
	trans - 119	594.37	316.42	396.1	501.87	671.08	566.95	632.32	476.85	498.44	310.9
	trans - 125	688.1	552.05	659.79	428.3	665.89	313.06	607.14	596.12	458.65	672.43
	trans - 126	339.94	668.01	464.82	346.4	432.45	423.95	339.15	642.88	438.63	476.93
	trans - 127	569.49	337.78	655.13	511.59	459.44	520.28	386.37	545.82	318.29	452.25
	trans - 140	511.38	485.75	480.83	424.14	540.42	578.68	606.88	607.77	345.5	356.91
	trans - 143	604.65	530.97	446.65	460.21	427.58	699.3	677.35	453.18	326.71	588.28
	trans - 150	394.63	610.97	568.57	407.99	413.73	589.47	331.28	679.96	305.44	521.22
	trans - 9	509.73	528.82	496.72	580.52	378.02	331.51	359.32	654.89	595.31	551.57
	trans - 10	603.65	327.56	345.11	322.98	491.4	698.06	534.91	386.79	565.07	542.64
	trans - 26	35.04	39.53	36.62	38.66	36.52	36.05	39.56	35.64	35.1	36.14
	trans - 30	37.54	39.49	40.21	35.6	36.24	37.79	38.08	35.94	40.2	40.39
	trans - 33	36.49	37.57	35.82	38.21	35.22	39.73	36.84	36.44	40.26	39.09
	trans - 51	40.18	35.05	38.58	36.52	36.52	35.68	38.12	39.86	40.05	40.18
	trans - 62	36.01	35.48	36.31	36.59	36.63	36.56	39.36	37.68	40.26	36.85
	trans - 124	369.16	397.07	300.9	636.14	441.67	625.73	513.49	499.68	523.13	300.39
	trans - 68	38.9	37.79	36.42	38.5	37.97	39.01	36.34	39.68	39.62	36.79
	trans - 69	39.71	40.25	36.53	39.2	35.43	36.7	35.82	37.12	36.88	39.02
	trans - 8	39.06	36.14	37.24	35.96	35.03	40.48	39.72	39.6	36.21	40.03
	trans - 12	394.01	646.05	387.73	577.97	562.39	468.08	656.33	391.29	367.75	417.45
	trans - 13	39.82	38.03	37.83	37.57	35.95	36.51	39.8	38.85	36.3	36.76
	trans - 27	315.96	566.92	547.59	353.03	473.66	401.76	598.88	403.27	403.96	426.35
	trans - 34	558.43	602.08	498.95	412.26	526.27	619.29	409.12	367.84	685.38	678.43
	trans - 41	606.75	650.89	619.1	352.28	506.94	377.08	612.22	611.58	334.88	325.75
	trans - 48	638.67	373.25	373.97	582.41	455.55	498.86	669.68	459.95	415.32	444.99
	trans - 54	567.38	484.49	620.14	415.58	322.23	676.99	371.05	517.18	462.81	539.15
	trans - 66	366.59	385.04	488.65	445.75	584.65	523.55	462.17	503.32	410.2	513.06
	trans - 73	37.26	35.54	40.4	36.19	35.11	36.09	38.15	36.07	39.94	39.05
	trans - 78	338.84	403.09	654.21	380.96	461.22	636.71	340.17	671.78	628.75	372.08
	trans - 79	37.84	35.41	40.45	38.49	38.36	35.12	38.62	36.72	35.97	38.77
	trans - 89	413.57	640.91	576.07	482.2	635.78	637.11	432.91	637.61	661.45	399.33
	trans - 114	36.54	39.1	37.22	38.27	38.69	36.15	37.65	36.14	36.13	39.06
	trans - 128	39.21	37.34	38.01	35.43	37.29	36.96	36.02	39.82	37.11	35.13
	trans - 135	508.44	303.15	481.52	573.26	395.79	499.74	610.67	600.91	327.19	538.42
	trans - 137	339.03	361.19	522.56	470.58	542.65	532.64	558.05	534.35	572	519.14
	trans - 141	651.32	626.14	380.82	601.35	434.78	630.66	610.52	647.18	571.14	671.17
	trans - 147	692.08	613.11	367.49	388.16	622.75	309.45	577.35	575.1	500.32	436.43
	trans - 149	36.89	38.09	40.06	37.68	35.02	39.05	37.76	40.42	38.32	37.38
