# Supplementary material for: Regulatory network structure determines patterns of intermolecular epistasis
Source: eLife. 2017 Nov 13;6:e28921. doi: 10.7554/eLife.28921 (PMC5699867; doi:10.7554/eLife.28921)
Supplement: Figure 3—source data 4. — The data provided here are shown in Figure 3—figure supplement 1. [file elife-28921-fig3-data4.xlsx]

## Sheet: Sheet1
Calculating epistasis in the presence of CI from flow cytometry measurements for 60 of 150 random system double mutants
	type of epistasis in plate reader	trans Mutant identity	OD-normalized mean fluorescence in presence of CI	standard deviation presence of CI	cis Mutant identity	fluorescence in the presence of CI	standard deviation in the presence of CI	double mutant identity	fluorescence in the presence of CI	standard deviation in the presence of CI	trans wt normalized	trans wt normalized st.dev	cis wt normalized in presence of CI	cis wt normalized in presence of CI st.dev	system wt normalized in presence of CI	system wt normalized in presence of CI st.dev	Multiplicative Epistasis presence of CI	Multiplicative epistasis presence of CI st.dev	MULTEpi T value	FDR-corrected P value
	positive	trans - 3	120	670.435	cis - 139	284	1490.83	system double 3	1342	508.001	1.04348	5.82987	2.46957	12.9638	11.6696	4.4174	4.52846	147.582	5.3461	0.00307394
	positive	trans - 5	143	642.965	cis - 97	221	84.0154	system double 5	1972	743.069	1.24348	5.591	1.92174	0.730568	17.1478	6.46147	7.1759	50.9678	27.095	1.28097e-06
	positive	trans - 11	98	494.689	cis - 19	192	1019.61	system double 11	1081	414.888	0.852174	4.30165	1.66957	8.86618	9.4	3.60772	6.60688	100.785	12.4396	5.95188e-05
	positive	trans - 18	96	490.444	cis - 36	122	540.073	system double 18	603	226.831	0.834783	4.26473	1.06087	4.69629	5.24348	1.97244	5.92085	36.3242	30.2921	7.35531e-07
	positive	trans - 20	122	646.014	cis - 92	288	1477.45	system double 20	970	361.5	1.06087	5.61752	2.50435	12.8474	8.43478	3.14347	3.17481	103.892	4.68086	0.00542941
	positive	trans - 23	85	403.827	cis - 117	142	682.878	system double 23	729	278.558	0.73913	3.51154	1.23478	5.93807	6.33913	2.42225	6.94573	54.0894	24.5798	2.07846e-06
	positive	trans - 32	86	452.755	cis - 17	139	687.716	system double 32	1019	383.582	0.747826	3.937	1.2087	5.98014	8.86087	3.3355	9.80299	76.5992	25.6975	1.66659e-06
	positive	trans - 35	84	426.654	cis - 90	231	1203.17	system double 35	1014	389.072	0.730435	3.71003	2.0087	10.4624	8.81739	3.38323	6.00959	127.362	8.7952	0.000315303
	positive	trans - 38	139	744.665	cis - 40	74	372.174	system double 38	287	108.34	1.2087	6.47535	0.643478	3.2363	2.49565	0.942084	3.20873	26.0158	18.9841	7.47357e-06
	positive	trans - 39	79	344.964	cis - 11	83	462.268	system double 39	1894	717.068	0.686957	2.99968	0.721739	4.01972	16.4696	6.23538	33.2179	118.874	60.603	2.31508e-08
	positive	trans - 40	79	400.822	cis - 53	132	616.16	system double 40	552	209.804	0.686957	3.4854	1.14783	5.35791	4.8	1.82438	6.08746	40.2413	28.2692	1.03737e-06
	positive	trans - 43	132	637.201	cis - 67	227	1117.66	system double 43	549	2670.12	1.14783	5.54088	1.97391	9.71878	4.77391	23.2184	2.10703	43.8004	5.65153	0.00240886
	positive	trans - 76	101	467.372	cis - 46	90	494.878	system double 76	9644	3675.04	0.878261	4.06411	0.782609	4.30328	83.8609	31.9569	122.009	600.544	45.0565	1.01679e-07
	positive	trans - 80	76	419.224	cis - 51	582	223.284	system double 80	945	360.064	0.66087	3.64542	5.06087	1.9416	8.21739	3.13099	2.45693	24.8749	13.0967	4.6317e-05
	positive	trans - 81	88	490.818	cis - 39	185	863.993	system double 81	384	141.85	0.765217	4.26798	1.6087	7.51298	3.33913	1.23347	2.71253	33.9745	11.2712	9.60523e-05
	positive	trans - 82	79	403.499	cis - 42	61	306.144	system double 82	487	183.677	0.686957	3.50869	0.530435	2.66212	4.23478	1.59719	11.6217	32.7597	72.5003	9.4563e-09
	positive	trans - 83	102	457.829	cis - 93	65	331.412	system double 83	388	145.419	0.886957	3.98112	0.565217	2.88185	3.37391	1.26451	6.73002	26.2921	48.7322	6.87492e-08
	positive	trans - 92	71	331.77	cis - 132	198	819.421	system double 92	3380	1269.66	0.617391	2.88496	1.72174	7.1254	29.3913	11.0405	27.6497	342.923	17.3773	1.1564e-05
	positive	trans - 93	69	361.254	cis - 33	119	517.865	system double 93	529	199.946	0.6	3.14134	1.03478	4.50318	4.6	1.73866	7.40896	37.3467	38.3725	2.2649e-07
	positive	trans - 94	77	394.003	cis - 146	648	246.992	system double 94	1720	667.257	0.669565	3.42611	5.63478	2.14775	14.9565	5.80223	3.96425	48.8543	13.5674	3.89825e-05
	positive	trans - 101	80	416.574	cis - 68	132	706.349	system double 101	1048	402.568	0.695652	3.62239	1.14783	6.14217	9.11304	3.50059	11.4129	85.5601	27.2135	1.25348e-06
	positive	trans - 112	84	397.963	cis - 94	133	582.765	system double 112	1038	391.99	0.730435	3.46055	1.15652	5.06752	9.02609	3.40861	10.6847	68.3153	31.6997	5.86689e-07
	positive	trans - 113	144	742.225	cis - 105	136	761.008	system double113	1870	703.606	1.25217	6.45413	1.18261	6.61746	16.2609	6.11831	10.9809	123.602	18.0563	9.57174e-06
	positive	trans - 119	95	459.147	cis - 12	101	503.754	system double 119	884	328.839	0.826087	3.99259	0.878261	4.38047	7.68696	2.85947	10.5951	53.8347	39.854	1.87508e-07
	positive	trans - 125	78	370.768	cis - 111	344	126.451	system double 125	760	285.692	0.678261	3.22407	2.9913	1.09957	6.6087	2.48427	3.2573	12.9237	39.0562	2.07401e-07
	positive	trans - 126	84	410.178	cis - 86	174	904.455	system double 126	1507	572.133	0.730435	3.56676	1.51304	7.86483	13.1043	4.97507	11.8572	144.511	16.7997	1.36598e-05
	positive	trans - 127	143	659.655	cis - 30	64	332.042	system double 127	2419	915.301	1.24348	5.73613	0.556522	2.88732	21.0348	7.95914	30.3961	222.539	29.5372	8.33948e-07
	positive	trans - 140	68	361.267	cis - 128	221	83.1203	system double 140	850	318.639	0.591304	3.14145	1.92174	0.722785	7.3913	2.77078	6.50452	15.2827	80.5388	5.59192e-09
	positive	trans - 143	71	371.574	cis - 21	108	569.904	system double 143	2690	1021.04	0.617391	3.23108	0.93913	4.95569	23.3913	8.87864	40.343	204.852	42.945	1.29187e-07
	positive	trans - 150	68	345.215	cis - 1	107	508.791	system double 150	1593	608.51	0.591304	3.00187	0.930435	4.42427	13.8522	5.29139	25.178	113.279	47.7261	7.6293e-08
	negative	trans - 9	80	353.687	cis - 112	361	136.057	system double 9	132	711.534	0.695652	3.07554	3.13913	1.18311	1.14783	6.18725	0.525623	3.61983	-29.3035	8.67564e-07
	negative	trans - 10	134	744.864	cis - 77	673	256.608	system double 10	173	64.3923	1.16522	6.47708	5.85217	2.23138	1.50435	0.559933	0.220609	3.32836	-52.3613	4.80349e-08
	negative	trans - 26	34819	822.585	cis - 75	994	375.772	system double 26	3859	1463.37	302.774	7.15291	8.64348	3.26758	33.5565	12.725	0.0128224	27.7721	-7.94826	0.000508126
	negative	trans - 30	19830	753.7	cis - 88	472	181.956	system double 30	4719	1764.91	172.435	6.55392	4.10435	1.58223	41.0348	15.347	0.0579807	65.5264	-3.21461	0.023607
	negative	trans - 33	20391	727.577	cis - 59	588	220.782	system double 33	1403	521.285	177.313	6.32676	5.11304	1.91985	12.2	4.53291	0.0134567	15.0966	-14.6124	2.71107e-05
	negative	trans - 51	21842	526.935	cis - 110	965	153.317	system double 51	10944	775.773	189.93	4.58204	8.3913	1.33319	95.1652	6.74586	0.059711	51.9689	-4.04578	0.0098663
	negative	trans - 62	27493	898.952	cis - 126	183	68.1291	system double 62	1038	398.665	239.07	7.81698	1.5913	0.592427	9.02609	3.46665	0.0237259	44.3389	-4.92347	0.00438429
	negative	trans - 68	20193	946.238	cis - 96	698	259.9	system double 68	4758	1810.18	175.591	8.22815	6.06957	2.26	41.3739	15.7407	0.0388209	56.0907	-3.83176	0.0122258
	negative	trans - 69	21811	898.98	cis - 63	748	287.703	system double 69	2184	811.968	189.661	7.81722	6.50435	2.50177	18.9913	7.06059	0.0153948	22.826	-9.64535	0.000203215
	negative	trans - 124	19383	709.523	cis - 102	378	104.945	system double 124	4881	706.492	168.548	6.16977	3.28696	0.912565	42.4435	6.14341	0.0766115	79.6687	-2.59168	0.0487374
	no epistasis	trans - 8	30192	824.955	cis - 61	103	1047.3	system double 8	1844	686.097	262.539	7.17352	0.895652	9.10693	16.0348	5.96606	0.0681914	128.428	-1.62238	0.16565
	no epistasis	trans - 12	90	697.594	cis - 54	511	398.575	system double 12	489	323.402	0.782609	6.06603	4.44348	3.46587	4.25217	2.81219	1.22277	19.7222	2.52568	0.0528074
	no epistasis	trans - 13	10239	3779.32	cis - 4	141	650.189	system double 13	1831	688.822	89.0348	32.8636	1.22609	5.65382	15.9217	5.98976	0.145851	426.762	-0.447541	0.673208
	no epistasis	trans - 27	104	390.408	cis - 47	639	204.755	system double 27	549	281.587	0.904348	3.39485	5.55652	1.78048	4.77391	2.44858	0.950027	9.8531	-1.13409	0.308186
	no epistasis	trans - 34	113	591.819	cis - 149	273	1314.77	system double 34	252	267.724	0.982609	5.14626	2.37391	11.4328	2.1913	2.32803	0.939415	25.9541	-0.521971	0.623981
	no epistasis	trans - 41	84	428.556	cis - 107	1391	522.654	system double 41	1039	390.435	0.730435	3.72658	12.0957	4.54482	9.03478	3.39509	1.0226	56.2853	0.089795	0.931936
	no epistasis	trans - 48	108	441.612	cis - 78	273	198.4	system double 48	248	231.547	0.93913	3.84011	2.37391	1.72521	2.15652	2.01346	0.967304	5.3553	-1.36519	0.230411
	no epistasis	trans - 54	109	413.695	cis - 109	204	78.7195	system double 54	196	73.2432	0.947826	3.59735	1.77391	0.684518	1.70435	0.636898	1.01367	3.68841	0.828824	0.444954
	no epistasis	trans - 66	173	846.56	cis - 115	136	687.747	system double 66	206	789.889	1.50435	7.36139	1.18261	5.9804	1.7913	6.8686	1.00689	13.7821	0.111712	0.915398
	no epistasis	trans - 73	209	78.1764	cis - 14	133	706.91	system double 73	254	348.544	1.81739	0.679795	1.15652	6.14704	2.2087	3.03082	1.05083	7.71843	1.47265	0.200831
	no epistasis	trans - 78	82	444.136	cis - 62	1071	402.246	system double 78	859	322.168	0.713043	3.86205	9.31304	3.49779	7.46957	2.80146	1.12483	36.7746	0.759037	0.48206
	no epistasis	trans - 79	268	100.586	cis - 131	163	814.904	system double 79	403	382.065	2.33043	0.874659	1.41739	7.08612	3.50435	3.32231	1.06091	10.9193	1.24742	0.267482
	no epistasis	trans - 89	133	687.629	cis - 55	1011	5056.86	system double 89	228	1213.75	1.15652	5.97938	8.7913	43.9727	1.98261	10.5543	0.194998	75.401	-2.38729	0.0625974
	no epistasis	trans - 114	274	142.116	cis - 133	187	901.916	system double 114	388	109.624	2.38261	1.23579	1.62609	7.84275	3.37391	0.953255	0.870838	11.4006	-2.53333	0.0523172
	no epistasis	trans - 128	5473	3162.72	cis - 148	683	461.104	system double 128	4139	277.31	47.5913	27.5019	5.93913	4.0096	35.9913	2.41139	0.127335	166.69	-1.17064	0.294495
	no epistasis	trans - 135	102	446	cis - 141	118	29.2352	system double 135	101	37.7922	0.886957	3.87826	1.02609	0.254219	0.878261	0.328628	0.965022	3.34858	-2.33574	0.0667331
	no epistasis	trans - 137	131	663.958	cis - 120	478	181.052	system double 137	532	201.139	1.13913	5.77355	4.15652	1.57437	4.62609	1.74903	0.977035	9.07223	-0.566018	0.595839
	no epistasis	trans - 141	102	431.164	cis - 82	338	127.791	system double 141	298	111.92	0.886957	3.74925	2.93913	1.11123	2.5913	0.973216	0.994025	4.64822	-0.287441	0.785307
	no epistasis	trans - 147	73	377.065	cis - 83	781	299.209	system double 147	478	180.77	0.634783	3.27883	6.7913	2.60182	4.15652	1.57191	0.964166	17.1582	-0.46699	0.660149
	no epistasis	trans - 149	488	681.246	cis - 16	691	3444.08	system double 149	980	289.786	4.24348	5.92388	6.0087	29.9485	8.52174	2.51987	0.334215	60.7266	-2.45155	0.0578264
