# Supplementary material for: Regulatory network structure determines patterns of intermolecular epistasis
Source: eLife. 2017 Nov 13;6:e28921. doi: 10.7554/eLife.28921 (PMC5699867; doi:10.7554/eLife.28921)
Supplement: Figure 6—source data 1. — This library consists only of point mutants in cis that lead to high expression in the absence of CI, and point mutants in trans that result in no expression in the presence of CI. The data provided here are shown in Figure 6, and Figure 6—figure supplement 1. [file elife-28921-fig6-data1.xlsx]

## Sheet: Sheet1
Measurements of single and double mutant effects, as well as calculation of epistasis, in the library consisting of trans point mutations with no expression in presence of CI, and cis point mutations with high expression the absence of CI
	trans Mutant identity	OD-normalized mean fluorescence in presence of CI	standard deviation presence of CI	cis Mutant identity	cis fluorescence in the presence of CI	cis standard deviation in the presence of CI	double mutant identity	system fluorescence in the presence of CI	system standard deviation in the presence of CI	trans wt normalized	trans wt normalized st.dev	cis wt normalized in presence of CI	cis wt normalized in presence of CI st.dev	system wt normalized in presence of CI	system wt normalized in presence of CI st.dev	Multiplicative Epistasis presence of CI	Multiplicative epistasis presence of CI st.dev	Epistasis T value	FDR-corrected P value
	G trans - 1	4609.5	1330.67	G cis - 133	1239.06	739.587	G system double 1	1339.91	1677.54	3.43159	0.990632	0.922431	0.00329587	0.997511	0.00747572	0.315129	1.07127	-1.56598	0.17813
	G trans - 2	1420.36	1198.52	G cis - 55	1392.22	931.819	G system double 2	1412.34	1286.01	1.0574	0.892247	1.03645	0.00415253	1.05143	0.00573094	0.959391	0.905171	-0.109894	0.916768
	G trans - 3	1403.23	1232.43	G cis - 127	2100.32	1381.18	G system double 3	2192.75	1180.58	1.04465	0.917498	1.56361	0.00615506	1.63241	0.00526111	0.999381	0.957926	-0.00158208	0.998799
	G trans - 4	1451.01	934.256	G cis - 1	2110.49	1222.96	G system double 4	2286.73	1014.3	1.08022	0.695516	1.57118	0.00544994	1.70238	0.00452009	1.00305	0.753651	0.00990662	0.992479
	G trans - 5	2179.06	657.292	G cis - 19	2752.5	745.951	G system double 5	3053.22	1452.82	1.62223	0.489328	2.04913	0.00332423	2.273	0.0064743	0.683784	0.542811	-1.42696	0.212939
	G trans - 6	2958.58	1123.89	G cis - 121	3055.35	1187.5	G system double 6	3116.05	1063.44	2.20254	0.836691	2.27459	0.00529192	2.31978	0.00473908	0.463041	0.853333	-1.54134	0.183869
	G trans - 7	1405.56	426.146	G cis - 138	3065.55	419.328	G system double 7	3797.35	353.489	1.04639	0.317249	2.28218	0.00186868	2.82698	0.00157528	1.18381	0.393015	1.1456	0.303816
	G trans - 8	4152.36	844.703	G cis - 8	3803.4	985.105	G system double 8	4013.5	1184.57	3.09127	0.628848	2.83148	0.00438999	2.98789	0.00527887	0.341361	0.663599	-2.43118	0.0592943
	G trans - 9	3113.07	756.789	G cis - 16	5511.06	737.602	G system double 9	5581.91	1506.29	2.31755	0.563399	4.10276	0.00328703	4.15551	0.00671256	0.437037	0.570674	-2.41639	0.0603857
	G trans - 10	2466.7	1384.4	G cis - 91	5170.77	1199.32	G system double 10	5603.39	1784.31	1.83636	1.03063	3.84944	0.00534459	4.1715	0.00795156	0.590117	1.11693	-0.898897	0.409905
	G trans - 11	3147.43	1080.72	G cis - 54	5418.29	1285.68	G system double 11	5847.68	1328.56	2.34313	0.804552	4.0337	0.00572949	4.35337	0.00592055	0.460601	0.868378	-1.52152	0.188616
	G trans - 12	2941.89	690.454	G cis - 143	5891.27	876.474	G system double 12	5966.33	1214.93	2.19012	0.514016	4.38581	0.00390589	4.4417	0.00541416	0.462413	0.520626	-2.52929	0.0525755
	G trans - 13	4910.27	1878.24	G cis - 69	6745.28	1125.5	G system double 13	6636.74	1682.79	3.6555	1.39828	5.02159	0.00501564	4.94079	0.00749911	0.269159	1.3758	-1.3012	0.24992
	G trans - 14	1096.52	770.305	G cis - 73	6709.61	761.621	G system double 14	6724.33	1525.94	0.816315	0.573461	4.99504	0.00339406	5.006	0.00680014	1.2277	0.575099	0.969852	0.376663
	G trans - 15	970.37	428.796	G cis - 99	7370.42	1065.76	G system double 15	6730.6	2121.95	0.722402	0.319221	5.48698	0.00474941	5.01067	0.00945621	1.2641	0.293375	2.20509	0.0785886
	G trans - 16	1740.74	361.413	G cis - 41	6216.59	468.084	G system double 16	6907.97	1470.53	1.29592	0.269058	4.62801	0.00208595	5.14271	0.00655322	0.857475	0.299097	-1.16723	0.295751
	G trans - 17	4817.23	1153.65	G cis - 100	6956.75	1078.15	G system double 17	6930.07	1255	3.58624	0.858845	5.17902	0.00480466	5.15916	0.00559273	0.277774	0.855579	-2.0677	0.0935122
	G trans - 18	1197.33	1008.94	G cis - 85	6715.45	1299.93	G system double 18	7422.19	1449.62	0.891363	0.751113	4.99939	0.00579299	5.52552	0.00646003	1.23994	0.830938	0.707322	0.510961
	G trans - 19	4805.61	1353.9	G cis - 122	7964.58	862.63	G system double 19	7786.02	1441.94	3.57759	1.00792	5.92931	0.0038442	5.79638	0.00642582	0.273251	0.985345	-1.80664	0.130636
	G trans - 20	5416.35	1276.64	G cis - 125	7303.2	1331.81	G system double 20	8099.22	1786.94	4.03226	0.950409	5.43694	0.00593503	6.02954	0.00796328	0.275031	1.05404	-1.68476	0.15285
	G trans - 21	3975.63	1095.05	G cis - 49	8147.9	1342.58	G system double 21	8153.59	1497.59	2.9597	0.815218	6.06579	0.00598301	6.07002	0.00667381	0.338108	0.81588	-1.98717	0.103623
	G trans - 22	2238.8	1207.31	G cis - 9	7536.64	971.066	G system double 22	8185.86	1075.48	1.66669	0.898797	5.61073	0.00432743	6.09405	0.00479272	0.651675	0.976351	-0.873886	0.422161
	G trans - 23	1349.65	218.245	G cis - 52	8596.66	835.662	G system double 23	9015.56	1341.21	1.00476	0.162474	6.39987	0.00372402	6.71173	0.00597695	1.04376	0.1722	0.622459	0.560924
	G trans - 24	962.963	717.846	G cis - 142	8400	1020	G system double 24	9016.97	873.352	0.716888	0.534408	6.25347	0.0045455	6.71277	0.00389198	1.49737	0.575237	2.11793	0.0877356
	G trans - 25	2084.02	1352.58	G cis - 146	9665.06	1244.4	G system double 25	9594.74	1424.6	1.55147	1.00694	7.19525	0.00554549	7.1429	0.00634855	0.63986	0.999944	-0.882207	0.418052
	G trans - 26	1350.64	547.509	G cis - 135	9518.02	964.83	G system double 26	10069.6	450.112	1.0055	0.407599	7.08579	0.00429964	7.49645	0.00200586	1.05217	0.432412	0.29552	0.779475
	G trans - 27	2157.87	672.744	G cis - 36	10550.3	882.519	G system double 27	10270	1724.18	1.60645	0.500831	7.85426	0.00393283	7.64562	0.00768359	0.605955	0.487887	-1.97835	0.104799
	G trans - 28	3327.59	804.293	G cis - 93	10514.1	819.458	G system double 28	10683.7	1136.49	2.47726	0.598764	7.82735	0.00365181	7.95357	0.00506462	0.410182	0.608533	-2.37416	0.0636237
	G trans - 29	5997.23	1115.7	G cis - 32	10860.9	1199.92	G system double 29	10957.9	1058.99	4.4647	0.830597	8.08554	0.00534728	8.15771	0.00471925	0.225979	0.838067	-2.2623	0.0731409
	G trans - 30	1984.97	739.746	G cis - 141	10779.5	843.527	G system double 30	11062.1	1175.49	1.47773	0.550712	8.02488	0.00375907	8.23533	0.00523844	0.694458	0.565542	-1.32337	0.242993
	G trans - 31	3142.15	713.747	G cis - 89	10251.3	819.183	G system double 31	11208.5	1207.41	2.33921	0.531356	7.63168	0.00365058	8.34425	0.00538069	0.46741	0.581115	-2.24495	0.0747491
	G trans - 32	1296.81	769.223	G cis - 111	10599.6	1185.15	G system double 32	11246	1322.58	0.965427	0.572656	7.89095	0.00528146	8.37221	0.00589391	1.09898	0.609306	0.39793	0.707103
	G trans - 33	3820.87	1211.17	G cis - 139	12768.4	1004.48	G system double 33	13099.8	1728.6	2.84449	0.901665	9.50556	0.00447634	9.75225	0.00770327	0.360681	0.925192	-1.69263	0.151308
	G trans - 34	2218.34	741.472	G cis - 77	12892	1337.79	G system double 34	13317.6	1054.06	1.65146	0.551996	9.59754	0.00596168	9.91441	0.0046973	0.625515	0.571343	-1.60551	0.169289
	G trans - 35	2905.23	1375.18	G cis - 103	13516.5	1137.47	G system double 35	13890.6	1007.2	2.16283	1.02377	10.0625	0.00506899	10.341	0.00448844	0.475155	1.05238	-1.22161	0.276305
	G trans - 36	2378.82	928.481	G cis - 50	13851.7	975.305	G system double 36	14119.6	1052.09	1.77094	0.691217	10.312	0.00434632	10.5115	0.0046885	0.575597	0.705063	-1.47444	0.200371
	G trans - 37	2081.37	759.587	G cis - 13	13921.1	1232.34	G system double 37	14654.7	1556.07	1.5495	0.565482	10.3637	0.00549176	10.9099	0.00693441	0.679379	0.596535	-1.31653	0.245111
	G trans - 38	1181.56	481.471	G cis - 23	5897.01	688.538	G system double 38	14744.4	949.975	0.879624	0.358436	4.39009	0.00306838	10.9766	0.00423344	2.84249	0.897023	5.03126	0.00399654
	G trans - 39	1014.7	1335.68	G cis - 45	14471	921.178	G system double 39	15020.7	1564.45	0.755405	0.994358	10.7731	0.00410511	11.1823	0.00697177	1.37407	1.03391	0.886232	0.416076
	G trans - 40	3811.82	736.684	G cis - 64	14159.5	1390.69	G system double 40	15573.7	1799.38	2.83775	0.548432	10.5412	0.00619742	11.594	0.00801871	0.387588	0.603739	-2.48468	0.0555218
	G trans - 41	1054.54	985.441	G cis - 47	14769.9	1097.15	G system double 41	15588.7	1134.71	0.785059	0.733622	10.9956	0.00488931	11.6052	0.0050567	1.3444	0.777657	1.08481	0.327519
	G trans - 42	1924.67	913.645	G cis - 62	14408.3	1256.07	G system double 42	15792.6	971.357	1.43284	0.680172	10.7264	0.00559752	11.757	0.00432872	0.764967	0.746935	-0.770764	0.475671
	G trans - 43	3338.53	1295.13	G cis - 140	16112.4	1059.49	G system double 43	16450.3	1189.13	2.4854	0.96417	11.995	0.0047215	12.2466	0.00529921	0.410788	0.984666	-1.46574	0.202618
	G trans - 44	2736.9	727.425	G cis - 79	15630.2	1043.61	G system double 44	16642.9	1311.3	2.03751	0.541539	11.636	0.0046507	12.39	0.00584363	0.522594	0.57732	-2.02557	0.0986674
	G trans - 45	2801.75	938.102	G cis - 123	16439.1	789.084	G system double 45	17354.1	1593.98	2.08579	0.69838	12.2382	0.00351645	12.9194	0.00710338	0.50612	0.737573	-1.64018	0.161892
	G trans - 46	911.665	1168.76	G cis - 59	17799.3	759.364	G system double 46	17385.8	1278	0.678698	0.870095	13.2509	0.00338401	12.943	0.00569525	1.43918	0.852329	1.26215	0.262565
	G trans - 47	5387	1084.3	G cis - 119	16678.8	762.817	G system double 47	18304	1247.59	4.01041	0.807218	12.4167	0.00339939	13.6266	0.00555972	0.273649	0.885952	-2.00822	0.100875
	G trans - 48	1986.28	1156.93	G cis - 114	17579.7	900.64	G system double 48	18514.8	1660.31	1.47871	0.861286	13.0874	0.00401358	13.7835	0.00739895	0.712237	0.90787	-0.776403	0.472622
	G trans - 49	2658.76	1260.03	G cis - 74	18459.2	1119.73	G system double 49	19006.5	1567.81	1.97934	0.938043	13.7422	0.00498995	14.1496	0.00698673	0.520197	0.966512	-1.21599	0.278259
	G trans - 50	2661.12	1340.54	G cis - 42	19409.8	1384.99	G system double 50	19615.3	1468.09	1.9811	0.997975	14.4498	0.00617201	14.6028	0.00654236	0.510114	1.00957	-1.1886	0.287967
	G trans - 51	3351.33	1059	G cis - 113	19942.1	1217.28	G system double 51	19847.3	1147.45	2.49493	0.788383	14.8461	0.00542464	14.7755	0.00511347	0.398907	0.785293	-1.87493	0.119653
	G trans - 52	1052.77	1566.01	G cis - 53	4799.26	1480.93	G system double 52	19867.9	1421.27	0.783742	1.16583	3.57286	0.00659959	14.7909	0.00633371	5.28207	4.82791	2.17255	0.0818786
	G trans - 53	3803.23	767.385	G cis - 128	25297.6	954.513	G system double 53	27666.7	1019.03	2.83136	0.571288	18.8331	0.00425366	20.5967	0.0045412	0.386263	0.625553	-2.40322	0.0613759
	G trans - 54	3752.73	973.681	G cis - 145	28497.9	1104.08	G system double 54	28669.5	1233.07	2.79376	0.724867	21.2155	0.00492021	21.3433	0.00549499	0.360096	0.7302	-2.14659	0.0846092
	G trans - 55	987.012	207.585	G cis - 24	1126.89	579.645	G system double 55	33614.2	1777.51	0.734791	0.154539	0.838925	0.00258311	25.0244	0.00792123	40.5954	4.61062	21.0359	4.4982e-06
	G trans - 56	1271.59	479.287	G cis - 28	6549.36	500.755	G system double 56	34006.9	2898.88	0.94665	0.35681	4.87574	0.00223155	25.3168	0.0129185	5.48502	1.85366	5.92665	0.00195047
	G trans - 57	986.228	324.528	G cis - 67	2611.49	480.46	G system double 57	35638.6	4196.15	0.734208	0.241598	1.94415	0.00214111	26.5315	0.0186996	18.5871	3.29798	13.0624	4.69136e-05
	G trans - 58	724.771	308.81	G cis - 68	6368.07	650.84	G system double 58	36508.1	2039.67	0.539563	0.229897	4.74077	0.00290038	27.1788	0.00908951	10.6253	1.32608	17.7795	1.03299e-05
	G trans - 59	5180.52	1302.14	G cis - 5	35844.8	1368.21	G system double 59	37410.5	1638.69	3.85669	0.969392	26.685	0.00609725	27.8506	0.00730259	0.270615	1.01269	-1.76423	0.13797
	G trans - 60	1998.92	759.834	G cis - 4	35000.6	675.498	G system double 60	38142.3	1406.15	1.48812	0.565666	26.0566	0.00301027	28.3954	0.00626634	0.732309	0.619112	-1.05911	0.338009
	G trans - 61	4920.45	1307.67	G cis - 112	37966.4	650.257	G system double 61	38358.7	1286.75	3.66308	0.973511	28.2645	0.00289778	28.5565	0.00573421	0.275815	0.98383	-1.80304	0.131243
	G trans - 62	1952.79	757.067	G cis - 102	40730.7	1148.61	G system double 62	41581.4	1336.23	1.45377	0.563606	30.3224	0.00511861	30.9557	0.00595476	0.702232	0.58561	-1.24551	0.268129
	G trans - 63	9782.42	673.553	G cis - 98	1166.67	250	G system double 63	45291	3298.59	7.28262	0.501433	0.868537	0.00111409	33.7174	0.0146997	5.33062	19.4661	0.544938	0.609212
	G trans - 64	3086.16	826.53	G cis - 83	45264	972.895	G system double 64	45882.1	1760.84	2.29752	0.615319	33.6972	0.00433558	34.1574	0.00784697	0.441195	0.627043	-2.18292	0.0808144
	G trans - 65	1259.26	327.442	G cis - 22	7530.49	807.622	G system double 65	46131	3007.36	0.937469	0.243767	5.60615	0.00359906	34.3427	0.0134019	6.53451	1.49911	9.04321	0.00027632
	G trans - 66	3678.73	1776.18	G cis - 126	47691.7	672.788	G system double 66	47482	1373.83	2.73867	1.32229	35.5046	0.00299819	35.3485	0.00612229	0.363535	1.31705	-1.18372	0.289728
	G trans - 67	1370.95	346.08	G cis - 39	6563.44	692.473	G system double 67	50104.5	5773.3	1.02062	0.257643	4.88622	0.00308592	37.3008	0.0257279	7.47965	1.97005	8.05656	0.000476883
	G trans - 68	5878.22	1396.98	G cis - 137	46469.5	1045.13	G system double 68	50312.5	1656.1	4.3761	1.04	34.5947	0.00465748	37.4557	0.00738017	0.247412	1.12671	-1.63613	0.162739
	G trans - 69	1438.47	1052.87	G cis - 21	9391.36	816.262	G system double 69	50353.8	3158.27	1.07088	0.783818	6.9915	0.00363756	37.4864	0.0140744	5.00681	4.20454	2.3343	0.0668527
	G trans - 70	5644.65	998.991	G cis - 33	48616.5	946.301	G system double 70	52199.9	1657.62	4.20221	0.743709	36.1931	0.00421707	38.8607	0.00738695	0.25551	0.799477	-2.28102	0.071447
	G trans - 71	1292.91	1331.1	G cis - 35	54664.7	1355.24	G system double 71	53440.7	1727.64	0.962518	0.990947	40.6957	0.00603945	39.7845	0.00769901	1.01568	1.00041	0.0383887	0.970863
	G trans - 72	736.2	362.107	G cis - 26	1210.69	376.767	G system double 72	54438	3270.86	0.548072	0.269574	0.901307	0.00167901	40.5269	0.0145762	82.0415	12.122	16.3761	1.54903e-05
	G trans - 73	1479.89	440.694	G cis - 94	5542.86	471.429	G system double 73	54588.7	4889.24	1.10172	0.328079	4.12644	0.00210086	40.6391	0.0217883	8.93922	3.23201	6.017	0.0018229
	G trans - 74	2182.63	1283.87	G cis - 129	56170.4	1109.32	G system double 74	54904.5	1410.96	1.62488	0.95579	41.8166	0.00494354	40.8742	0.00628777	0.601561	0.94249	-1.03553	0.347885
	G trans - 75	797.17	245.192	G cis - 109	7459.46	6189.19	G system double 75	56768.9	6439.3	0.593461	0.182536	5.55327	0.0275813	42.2622	0.0286959	12.8236	2.40577	12.0385	6.98004e-05
	G trans - 76	1504.07	1053.14	G cis - 31	6666.67	1051.85	G system double 76	57640.9	3738.25	1.11972	0.784024	4.96307	0.00468744	42.9113	0.016659	7.72171	6.78116	2.42802	0.059526
	G trans - 77	4945.11	1052.26	G cis - 2	54848.5	678.865	G system double 77	60126.3	1422.69	3.68144	0.783363	40.8326	0.00302527	44.7616	0.00634002	0.297771	0.859528	-2.00122	0.101781
	G trans - 78	1229.68	752.483	G cis - 132	55237.4	770.232	G system double 78	60573.8	1510.05	0.915447	0.560194	41.1221	0.00343244	45.0948	0.00672934	1.19789	0.637157	0.760784	0.481104
	G trans - 79	4895.05	1377.97	G cis - 86	61696.8	807.39	G system double 79	61039.1	1198.8	3.64417	1.02584	45.9309	0.00359803	45.4412	0.00534231	0.271485	1.0159	-1.75657	0.139339
	G trans - 80	3326.96	1183.34	G cis - 115	60890.6	1321.11	G system double 80	64262.9	1273.41	2.47679	0.880947	45.3306	0.00588735	47.8412	0.00567478	0.426109	0.936666	-1.50079	0.193707
	G trans - 81	897.432	1123.57	G cis - 38	68439	915.716	G system double 81	73861.2	1312.88	0.668102	0.836452	50.9502	0.00408077	54.9867	0.00585069	1.61536	0.963176	1.56495	0.178368
	G trans - 82	1560.98	1229.04	G cis - 27	873.153	446.902	G system double 82	75732.6	1416.5	1.16208	0.914973	0.650028	0.00199156	56.3799	0.00631244	74.6371	79.3599	2.27285	0.0721807
	G trans - 83	5065.5	1178.52	G cis - 110	76541.8	898.441	G system double 83	76029.3	1540.63	3.77106	0.877361	56.9824	0.00400378	56.6008	0.00686561	0.263401	0.873555	-2.06546	0.09378
	G trans - 84	5243.43	1361.54	G cis - 14	78335.2	923.087	G system double 84	77100.4	1390.73	3.90353	1.01361	58.3175	0.00411362	57.3982	0.00619761	0.25214	0.999469	-1.83285	0.126304
	G trans - 85	1516.77	330.911	G cis - 29	4750	681.25	G system double 85	77892.3	4895.91	1.12917	0.24635	3.53619	0.0030359	57.9878	0.021818	14.5225	4.04276	8.19321	0.000440656
	G trans - 86	2552.59	1201.61	G cis - 61	82027.9	855.482	G system double 86	80091	1260.48	1.9003	0.894552	61.0665	0.00381234	59.6245	0.00561719	0.513805	0.881581	-1.3509	0.23464
	G trans - 87	3082.88	1388.94	G cis - 87	78991.7	816.907	G system double 87	81356.9	1412.65	2.29508	1.03401	58.8062	0.00364044	60.567	0.0062953	0.448761	1.06929	-1.26275	0.262365
	G trans - 88	1255.78	490.996	G cis - 107	5307.53	660.215	G system double 88	89800.3	91035.2	0.934881	0.365527	3.95124	0.00294216	66.8528	0.405686	18.0979	6.18906	6.76698	0.00107085
	G trans - 89	2059.15	866.914	G cis - 51	84861.8	1146.41	G system double 89	91033.2	1199.38	1.53296	0.645383	63.1763	0.00510882	67.7706	0.00534487	0.699773	0.728226	-1.00985	0.358909
	G trans - 90	2956.19	783.895	G cis - 48	94207.5	1238.68	G system double 90	92392.8	1736.56	2.20076	0.583579	70.1338	0.00552001	68.7827	0.00773874	0.445635	0.597774	-2.27161	0.0722926
	G trans - 91	4400.2	1049.17	G cis - 134	89303.3	930.154	G system double 91	94407.2	1124.11	3.27577	0.781067	66.4828	0.00414511	70.2824	0.00500947	0.322718	0.830482	-1.99763	0.102249
	G trans - 92	1167.67	444.219	G cis - 30	4002.3	533.908	G system double 92	94557.4	8289.39	0.869287	0.330703	2.97955	0.00237929	70.3942	0.0369406	27.1783	7.81551	8.20465	0.000437773
	G trans - 93	5718.9	1347.88	G cis - 104	96283.1	769.836	G system double 93	96062.9	1755.24	4.25749	1.00344	71.679	0.00343067	71.515	0.00782202	0.234343	1.0028	-1.87023	0.120378
	G trans - 94	3000.39	717.938	G cis - 136	86722.4	821.179	G system double 94	96259.4	1316.12	2.23367	0.534476	64.5614	0.00365948	71.6613	0.00586514	0.496927	0.604759	-2.03762	0.0971624
	G trans - 95	1300.43	395.033	G cis - 25	6722.11	739.986	G system double 95	96906.4	4059.85	0.968121	0.294086	5.00434	0.00329765	72.143	0.0180922	14.8908	4.24669	8.0122	0.000489396
	G trans - 96	1405.94	392.513	G cis - 63	6384	887.64	G system double 96	97086.4	3426.56	1.04667	0.29221	4.75264	0.00395565	72.277	0.01527	14.5297	4.45225	7.4436	0.000690035
	G trans - 97	4199.12	1053.8	G cis - 12	97839.1	797.322	G system double 97	101373	1252.33	3.12608	0.784509	72.8373	0.00355316	75.4683	0.00558086	0.331445	0.81736	-2.00355	0.101479
	G trans - 98	3080.68	949.183	G cis - 90	100440	1249.78	G system double 98	104407	1493.08	2.29344	0.706629	74.7739	0.00556949	77.7272	0.00665371	0.453247	0.758403	-1.7659	0.137672
	G trans - 99	3377.64	1203.38	G cis - 117	105320	827.923	G system double 99	104439	1162.58	2.51452	0.895871	78.4065	0.00368953	77.7507	0.0051809	0.394364	0.895672	-1.6563	0.158564
	G trans - 100	1474.83	1335.51	G cis - 44	97590.3	1018.81	G system double 100	105372	1193.56	1.09795	0.994232	72.6521	0.00454021	78.4453	0.00531893	0.983412	1.12145	-0.0362311	0.9725
	G trans - 101	2802.78	759.665	G cis - 149	110455	813.103	G system double 101	108790	1636.86	2.08656	0.56554	82.2297	0.00362349	80.9901	0.00729445	0.472033	0.574497	-2.2511	0.0741747
	G trans - 102	5641.65	1369.87	G cis - 108	106918	924.948	G system double 102	109264	1266.02	4.19998	1.01981	79.5961	0.00412191	81.343	0.00564185	0.243322	1.04525	-1.77324	0.136378
	G trans - 103	3692.52	866.402	G cis - 101	108131	777.379	G system double 103	114507	1156.11	2.74893	0.645002	80.4992	0.00346429	85.2462	0.00515207	0.385229	0.691433	-2.1779	0.0813278
	G trans - 104	1215.04	1160.88	G cis - 11	111807	1010.1	G system double 104	117437	1020.29	0.904547	0.864227	83.2356	0.00450138	87.4274	0.00454679	1.1612	1.00663	0.392261	0.711028
	G trans - 105	3447.68	783.076	G cis - 71	115168	821.259	G system double 105	117914	1383.04	2.56666	0.582969	85.7383	0.00365983	87.7823	0.00616331	0.3989	0.60985	-2.41435	0.0605384
	G trans - 106	3112.76	970.982	G cis - 7	120783	714.546	G system double 106	121279	1000.04	2.31733	0.722858	89.9183	0.00318428	90.2874	0.00445653	0.433303	0.736352	-1.88513	0.118096
	G trans - 107	1007.55	1480.14	G cis - 40	39693	961.63	G system double 107	121668	1372.45	0.750082	1.10191	29.5499	0.00428538	90.577	0.00611617	4.08651	3.41701	2.21258	0.0778518
	G trans - 108	2805.05	1355.34	G cis - 120	116077	997.312	G system double 108	123186	1715.58	2.08825	1.009	86.4149	0.00444439	91.7071	0.00764524	0.508197	1.08843	-1.10679	0.318771
	G trans - 109	3182.6	863.768	G cis - 15	121237	671.029	G system double 109	124134	1094.09	2.36932	0.643041	90.2558	0.00299035	92.4128	0.00487567	0.432149	0.66866	-2.0802	0.0920387
	G trans - 110	3664.74	768.665	G cis - 84	113460	1064.43	G system double 110	124868	1579.77	2.72825	0.572241	84.4666	0.00474348	92.9593	0.00704005	0.403388	0.650185	-2.24766	0.0744952
	G trans - 111	1846.31	1327.54	G cis - 80	128698	1142.37	G system double 111	128617	1574.46	1.37451	0.9883	95.8109	0.00509083	95.7504	0.00701637	0.727074	1.04941	-0.637049	0.552114
	G trans - 112	4222.79	1035.95	G cis - 72	133641	1162.36	G system double 112	130108	1238.62	3.1437	0.771221	99.4906	0.0051799	96.8599	0.00551976	0.309686	0.767603	-2.20285	0.0788101
	G trans - 113	1493.96	897.792	G cis - 70	126518	987.611	G system double 113	131123	1656.4	1.1122	0.66837	94.1878	0.00440116	97.6156	0.00738155	0.931843	0.79312	-0.210497	0.841589
	G trans - 114	3255.3	715.833	G cis - 88	126932	1135.32	G system double 114	133946	1118.15	2.42344	0.532909	94.4958	0.00505939	99.7172	0.00498287	0.435437	0.599651	-2.30616	0.0692383
	G trans - 115	2456.54	1126.28	G cis - 66	129189	943.434	G system double 115	134460	1690.27	1.8288	0.838469	96.1758	0.00420429	100.1	0.00753247	0.569121	0.902517	-1.16943	0.294939
	G trans - 116	4135.52	882.843	G cis - 118	122015	910.047	G system double 116	134599	1190.72	3.07873	0.657242	90.8355	0.0040555	100.204	0.00530628	0.358307	0.736941	-2.1329	0.0860878
	G trans - 117	4548.41	1224.97	G cis - 17	130141	986.889	G system double 117	134631	1760.02	3.38611	0.911939	96.8845	0.00439794	100.228	0.0078433	0.305514	0.952346	-1.78626	0.13411
	G trans - 118	2812.35	1142.71	G cis - 20	133342	1060.42	G system double 118	139812	1324.06	2.09369	0.850705	99.2681	0.0047256	104.085	0.00590052	0.500802	0.922402	-1.32565	0.242293
	G trans - 119	731.684	1299.92	G cis - 97	145653	1161.14	G system double 119	141939	1611.72	0.54471	0.967741	108.433	0.00517448	105.668	0.0071824	1.78903	1.37731	1.40326	0.219489
	G trans - 120	1729.07	1079.14	G cis - 106	6004.6	1485.71	G system double 120	142529	2649.43	1.28723	0.803374	4.47018	0.00662087	106.107	0.0118068	18.4402	19.0773	2.23929	0.0752815
	G trans - 121	1911.46	730.796	G cis - 37	143398	1020.92	G system double 121	145007	1716.63	1.423	0.544049	106.754	0.00454958	107.952	0.00764994	0.710627	0.649456	-1.0914	0.324874
	G trans - 122	4052.94	1199.34	G cis - 18	143239	788.981	G system double 122	151854	1302.07	3.01726	0.892864	106.636	0.00351599	113.049	0.00580249	0.35136	0.955687	-1.66251	0.157299
	G trans - 123	2321.07	936.039	G cis - 81	152046	1036.83	G system double 123	156216	1150.27	1.72795	0.696844	113.192	0.00462049	116.297	0.00512602	0.594594	0.780577	-1.27218	0.259261
	G trans - 124	3990.28	929.136	G cis - 96	155660	1050.02	G system double 124	158363	1622.01	2.97061	0.691705	115.883	0.00467928	117.895	0.00722828	0.342477	0.727808	-2.21294	0.077816
	G trans - 125	1601.92	1218.79	G cis - 148	165693	1078.09	G system double 125	161193	1159.68	1.19256	0.907341	123.352	0.00480437	120.002	0.00516797	0.815758	1.00642	-0.44842	0.672614
	G trans - 126	1205.91	1275.36	G cis - 10	150016	827.556	G system double 126	163607	1722.78	0.897751	0.949456	111.681	0.00368789	121.799	0.00767736	1.21481	1.15002	0.457535	0.666481
	G trans - 127	3929.51	867.293	G cis - 95	152972	1346.27	G system double 127	167450	1690.22	2.92536	0.645665	113.882	0.00599946	124.66	0.00753223	0.37419	0.75159	-2.03956	0.0969228
	G trans - 128	3032.58	1191.69	G cis - 78	166355	1238.67	G system double 128	168230	1409.24	2.25763	0.887167	123.844	0.00551995	125.241	0.00628011	0.447935	0.947987	-1.42647	0.213071
	G trans - 129	4100.13	1317.13	G cis - 131	175830	1139.93	G system double 129	171309	1687.67	3.05238	0.980555	130.899	0.00507994	127.533	0.00752089	0.319188	0.978633	-1.70405	0.149096
	G trans - 130	2468.4	813.83	G cis - 105	157601	652.91	G system double 130	172987	1030.42	1.83763	0.605864	117.328	0.00290961	128.782	0.00459194	0.597303	0.695569	-1.41812	0.215358
	G trans - 131	1107.85	1225.26	G cis - 56	176941	672.436	G system double 131	173246	1266.91	0.824752	0.91216	131.726	0.00299662	128.975	0.00564584	1.18716	1.00859	0.454556	0.668482
	G trans - 132	1796.19	658.604	G cis - 3	186679	726.202	G system double 132	183976	1761.28	1.33719	0.490305	138.975	0.00323622	136.963	0.00784893	0.737007	0.58597	-1.09937	0.321699
	G trans - 133	1042.08	1022.45	G cis - 58	175319	1136.96	G system double 133	185415	1152.82	0.775785	0.761174	130.518	0.00506671	138.034	0.00513737	1.36325	1.20862	0.736194	0.494679
	G trans - 134	3584.14	687.084	G cis - 43	170058	917.189	G system double 134	186508	1367.7	2.66825	0.511507	126.601	0.00408733	138.847	0.00609497	0.41103	0.599952	-2.40465	0.0612675
	G trans - 135	1722.83	1344.81	G cis - 34	193557	869.082	G system double 135	188339	1197.97	1.28258	1.00116	144.096	0.00387295	140.211	0.00533859	0.758658	1.06219	-0.556551	0.601823
	G trans - 136	2957.73	1088.57	G cis - 46	174909	1126.2	G system double 136	188775	1562.62	2.20191	0.810395	130.213	0.00501876	140.535	0.00696361	0.490152	0.931447	-1.34078	0.237679
	G trans - 137	5897.23	1230.36	G cis - 75	185184	670.967	G system double 137	191078	1443.65	4.39026	0.91595	137.862	0.00299008	142.25	0.00643345	0.235028	0.950059	-1.97229	0.105614
	G trans - 138	1564.55	1063.25	G cis - 92	198216	715.924	G system double 138	194953	1283.4	1.16475	0.791546	147.564	0.00319042	145.134	0.00571931	0.844418	0.874142	-0.435966	0.681042
	G trans - 139	2424.75	750.699	G cis - 147	184377	1186.52	G system double 139	200124	1705.42	1.80513	0.558866	137.261	0.00528758	148.985	0.00759998	0.601292	0.747268	-1.30694	0.248111
	G trans - 140	4913.23	928.038	G cis - 116	186730	672.423	G system double 140	202520	1651.9	3.65771	0.690887	139.013	0.00299656	150.768	0.00736148	0.296512	0.759418	-2.26909	0.0725216
	G trans - 141	1864.8	1042.13	G cis - 82	195145	1297.49	G system double 141	203501	1060.17	1.38827	0.775827	145.277	0.0057821	151.498	0.00472453	0.751165	1.02601	-0.594065	0.578325
	G trans - 142	798.79	884.999	G cis - 124	203178	866.81	G system double 142	203879	1022.75	0.594667	0.658847	151.258	0.00386282	151.78	0.00455774	1.68742	1.18707	1.41847	0.215262
	G trans - 143	3884.45	963.618	G cis - 130	202668	762.138	G system double 143	204277	1189.87	2.89182	0.717375	150.878	0.00339637	152.076	0.00530249	0.348548	0.744803	-2.14248	0.0850503
	G trans - 144	4649.59	1206.49	G cis - 60	187177	1200.74	G system double 144	205602	1568.84	3.46143	0.898186	139.346	0.00535095	153.062	0.00699135	0.317335	1.01458	-1.64816	0.160236
	G trans - 145	2292.42	1089.92	G cis - 6	209031	1201.39	G system double 145	206231	1746.15	1.70662	0.811406	155.615	0.00535385	153.531	0.00778151	0.578105	0.934259	-1.10615	0.319023
	G trans - 146	2989.54	808.065	G cis - 144	217020	976.131	G system double 146	212884	1706.38	2.22559	0.601572	161.563	0.00435	158.484	0.00760428	0.440756	0.666468	-2.05541	0.094987
	G trans - 147	4747.35	985.078	G cis - 65	198800	900.549	G system double 147	214842	1355.71	3.53422	0.733351	147.999	0.00401318	159.941	0.00604153	0.30578	0.813072	-2.09143	0.0907347
	G trans - 148	1513.79	1120.58	G cis - 57	209172	905.948	G system double 148	214937	1303.55	1.12696	0.834228	155.72	0.00403724	160.012	0.00580909	0.911799	1.03122	-0.209506	0.842322
	G trans - 149	2569.95	1313.83	G cis - 150	196324	691.841	G system double 149	216202	1470.13	1.91322	0.978094	146.156	0.0030831	160.954	0.00655142	0.5756	1.10792	-0.938306	0.391165
	G trans - 150	740.567	811.403	G cis - 76	197917	913.044	G system double 150	216314	1566.42	0.551323	0.604057	147.341	0.00406886	161.037	0.00698055	1.98242	1.35955	1.77002	0.136943
