# Supplementary material for: Regulatory network structure determines patterns of intermolecular epistasis
Source: eLife. 2017 Nov 13;6:e28921. doi: 10.7554/eLife.28921 (PMC5699867; doi:10.7554/eLife.28921)
Supplement: Figure 6—source data 2. [file elife-28921-fig6-data2.xlsx]

## Sheet: Sheet1
Location of single point mutations in cis and trans in the 150 system mutant library consisting of a point mutation in trans that has no expression in the presence of CI, and a cis point mutation with high expression in the absence of CI
	trans Mutant identity	trans mutated residue	trans mutation	trans mutation location	+	cis Mutant identity	cis mutated residue	cis mutation	cis mutation location	=	double mutant identity		cI reference sequence		(NTD; linker region; CTD)
	G trans - 4	12	G	NTD	+	G cis - 1	1	A		=	G system double 4
	G trans - 77	398	T	CTD	+	G cis - 2	1	T		=	G system double 77		1 10 20 30 40 50
	G trans - 58	330	A	linker region	+	G cis - 3	3	A		=	G system double 58		| | | | | |
	G trans - 55	316	C	linker region	+	G cis - 4	3	G		=	G system double 55		ATGAGCACAAAAAAGAAACCATTAACACAAGAGCAGCTTGAGGACGCACG
	G trans - 59	331	G	linker region	+	G cis - 5	3	T		=	G system double 59		TCGCCTTAAAGCAATTTATGAAAAAAAGAAAAATGAACTTGGCTTATCCC
	G trans - 69	368	G	linker region	+	G cis - 6	4	A		=	G system double 69		AGGAATCTGTCGCAGACAAGATGGGGATGGGGCAGTCAGGCGTTGGTGCT
	G trans - 106	516	T	CTD	+	G cis - 7	4	C		=	G system double 106		TTATTTAATGGCATCAATGCATTAAATGCTTATAACGCCGCATTGCTTGC
	G trans - 8	49	T	NTD	+	G cis - 8	4	T		=	G system double 8		AAAAATTCTCAAAGTTAGCGTTGAAGAATTTAGCCCTTCAATCGCCAGAG
	G trans - 22	119	T	NTD	+	G cis - 9	4	T		=	G system double 22		AAATCTACGAGATGTATGAAGCGGTTAGTATGCAGCCGTCACTTAGAAGT
	G trans - 126	596	C	CTD	+	G cis - 10	5	G		=	G system double 126		GAGTATGAGTACCCTGTTTTTTCTCATGTTCAGGCAGGGATGTTCTCACC
	G trans - 104	499	G	CTD	+	G cis - 11	6	T		=	G system double 104		TGAGCTTAGAACCTTTACCAAAGGTGATGCGGAGAGATGGGTAAGCACAA
	G trans - 37	222	G	NTD	+	G cis - 13	7	C		=	G system double 37		CCAAAAAAGCCAGTGATTCTGCATTCTGGCTTGAGGTTGAAGGTAATTCC
	G trans - 76	398	G	Carboxy-Terminal Domain (CTD)	+	G cis - 12	7	C		=	G system double 76		ATGACCGCACCAACAGGCTCCAAGCCAAGCTTTCCTGACGGAATGTTAAT
	G trans - 84	419	G	CTD	+	G cis - 14	7	T		=	G system double 84		TCTCGTTGACCCTGAGCAGGCTGTTGAGCCAGGTGATTTCTGCATAGCCA
	G trans - 109	527	T	CTD	+	G cis - 15	7	T		=	G system double 109		GACTTGGGGGTGATGAGTTTACCTTCAAGAAACTGATCAGGGATAGCGGT
	G trans - 9	51	G	NTD	+	G cis - 16	8	C		=	G system double 9		CAGGTGTTTTTACAACCACTAAACCCACAGTACCCAATGATCCCATGCAA
	G trans - 117	560	A	CTD	+	G cis - 17	8	C		=	G system double 117		TGAGAGTTGTTCCGTTGTGGGGAAAGTTATCGCTAGTCAGTGGCCTGAAG
	G trans - 122	583	A	CTD	+	G cis - 18	8	T		=	G system double 122		AGACGTTTGGCTGA
	G trans - 5	19	A	NTD	+	G cis - 19	9	A		=	G system double 5
	G trans - 118	566	T	CTD	+	G cis - 20	9	C		=	G system double 118
	G trans - 100	492	T	CTD	+	G cis - 22	9	G		=	G system double 100		Pr reference sequence		(CI operators; -10 and -35 of RNAP)
	G trans - 145	684	A	CTD	+	G cis - 21	9	G		=	G system double 145
	G trans - 149	704	T	CTD	+	G cis - 23	10	G		=	G system double 149		1 10 20 30 40 50
	G trans - 60	331	A	linker region	+	G cis - 24	11	C		=	G system double 60		| | | | | |
	G trans - 79	401	G	CTD	+	G cis - 25	12	G	5bp away from operator	=	G system double 79		CTCGAGGATAAATATCTAACACCGTGCGTGTTGACTATTTTACCTCTGGC
	G trans - 43	254	G	NTD	+	G cis - 26	13	C	5bp away from operator	=	G system double 43		GGTGATAATGGTTGCATGTACTAGAATTCATTAA
	G trans - 113	539	C	CTD	+	G cis - 27	13	G	5bp away from operator	=	G system double 113
	G trans - 26	153	G	NTD	+	G cis - 28	14	C	5bp away from operator	=	G system double 26
	G trans - 135	634	A	CTD	+	G cis - 29	15	A	5bp away from operator	=	G system double 135
	G trans - 125	596	A	CTD	+	G cis - 30	15	C	5bp away from operator	=	G system double 125
	G trans - 97	462	T	CTD	+	G cis - 31	15	G	5bp away from operator	=	G system double 97
	G trans - 29	170	A	NTD	+	G cis - 32	16	A	5bp away from operator	=	G system double 29
	G trans - 70	373	T	linker region	+	G cis - 33	16	G	5bp away from operator	=	G system double 70
	G trans - 85	419	A	CTD	+	G cis - 34	16	G	5bp away from operator	=	G system double 85
	G trans - 71	374	T	linker region	+	G cis - 35	16	T	5bp away from operator	=	G system double 71
	G trans - 27	160	C	NTD	+	G cis - 36	17	A	Or2 operator	=	G system double 27
	G trans - 121	580	G	CTD	+	G cis - 37	17	G	Or2 operator	=	G system double 121
	G trans - 81	408	C	CTD	+	G cis - 38	18	C	Or2 operator	=	G system double 81
	G trans - 67	354	C	linker region	+	G cis - 39	18	T	Or2 operator	=	G system double 67
	G trans - 107	519	C	CTD	+	G cis - 40	19	C	Or2 operator	=	G system double 107
	G trans - 88	423	G	CTD	+	G cis - 41	20	A	Or2 operator	=	G system double 88
	G trans - 50	290	T	linker region	+	G cis - 42	20	T	Or2 operator	=	G system double 50
	G trans - 134	630	C	CTD	+	G cis - 43	21	C	Or2 operator	=	G system double 134
	G trans - 39	226	C	NTD	+	G cis - 45	21	G	Or2 operator	=	G system double 39
	G trans - 65	347	T	linker region	+	G cis - 44	21	G	Or2 operator	=	G system double 65
	G trans - 120	580	C	CTD	+	G cis - 46	21	T	Or2 operator	=	G system double 120
	G trans - 41	240	T	NTD	+	G cis - 47	22	A	Or2 operator	=	G system double 41
	G trans - 21	113	G	NTD	+	G cis - 49	22	T	Or2 operator	=	G system double 21
	G trans - 90	431	A	CTD	+	G cis - 48	22	T	Or2 operator	=	G system double 90
	G trans - 36	204	G	NTD	+	G cis - 50	24	A	Or2 operator	=	G system double 36
	G trans - 89	424	C	CTD	+	G cis - 51	24	C	Or2 operator	=	G system double 89
	G trans - 23	122	C	NTD	+	G cis - 52	24	T	Or2 operator	=	G system double 23
	G trans - 52	293	C	linker region	+	G cis - 53	25	G	Or2 operator	=	G system double 52
	G trans - 11	69	C	NTD	+	G cis - 54	26	C	Or2 operator	=	G system double 11
	G trans - 2	9	T	NTD	+	G cis - 55	26	T	Or2 operator	=	G system double 2
	G trans - 131	620	C	CTD	+	G cis - 56	27	A	Or2 operator	=	G system double 131
	G trans - 148	695	G	CTD	+	G cis - 57	27	G	Or2 operator	=	G system double 148
	G trans - 46	262	C	NTD	+	G cis - 59	28	C	Or2 operator	=	G system double 46
	G trans - 133	626	T	CTD	+	G cis - 58	28	C	Or2 operator	=	G system double 133
	G trans - 144	680	C	CTD	+	G cis - 60	28	T	Or2 operator	=	G system double 144
	G trans - 86	422	T	CTD	+	G cis - 61	29	A	Or2 operator	=	G system double 86
	G trans - 42	241	C	NTD	+	G cis - 62	29	C	Or2 operator	=	G system double 42
	G trans - 96	458	T	CTD	+	G cis - 63	29	G	Or2 operator	=	G system double 96
	G trans - 40	239	G	NTD	+	G cis - 64	30	C	Or2 operator	=	G system double 40
	G trans - 147	695	A	CTD	+	G cis - 65	30	T	Or2 operator	=	G system double 147
	G trans - 115	554	C	CTD	+	G cis - 66	38	C	5bp away from operator	=	G system double 115
	G trans - 10	57	C	NTD	+	G cis - 67	38	G	5bp away from operator	=	G system double 10
	G trans - 132	622	T	CTD	+	G cis - 68	39	G	5bp away from operator	=	G system double 132
	G trans - 13	70	A	NTD	+	G cis - 69	40	A	5bp away from operator	=	G system double 13
	G trans - 82	413	T	CTD	+	G cis - 70	42	G	Or1 operator	=	G system double 82
	G trans - 105	507	C	CTD	+	G cis - 71	43	G	Or1 operator	=	G system double 105
	G trans - 112	537	G	CTD	+	G cis - 72	43	T	Or1 operator	=	G system double 112
	G trans - 14	72	G	NTD	+	G cis - 73	44	A	Or1 operator	=	G system double 14
	G trans - 49	278	C	linker region	+	G cis - 74	44	T	Or1 operator	=	G system double 49
	G trans - 137	647	C	CTD	+	G cis - 75	45	A	Or1 operator	=	G system double 137
	G trans - 150	707	C	CTD	+	G cis - 76	45	G	Or1 operator	=	G system double 150
	G trans - 34	202	T	NTD	+	G cis - 77	46	G	Or1 operator	=	G system double 34
	G trans - 128	613	G	CTD	+	G cis - 78	47	A	Or1 operator	=	G system double 128
	G trans - 44	261	A	NTD	+	G cis - 79	47	C	Or1 operator	=	G system double 44
	G trans - 111	535	C	CTD	+	G cis - 80	47	G	Or1 operator	=	G system double 111
	G trans - 123	588	G	CTD	+	G cis - 81	48	A	Or1 operator	=	G system double 123
	G trans - 141	673	G	CTD	+	G cis - 82	48	A	Or1 operator	=	G system double 141
	G trans - 64	338	C	linker region	+	G cis - 83	48	C	Or1 operator	=	G system double 64
	G trans - 110	531	G	CTD	+	G cis - 84	48	T	Or1 operator	=	G system double 110
	G trans - 18	80	T	NTD	+	G cis - 85	49	A	Or1 operator	=	G system double 18
	G trans - 95	454	T	CTD	+	G cis - 86	49	C	Or1 operator	=	G system double 95
	G trans - 87	423	C	CTD	+	G cis - 87	49	T	Or1 operator	=	G system double 87
	G trans - 114	553	G	CTD	+	G cis - 88	50	A	Or1 operator	=	G system double 114
	G trans - 31	193	C	NTD	+	G cis - 89	50	G	Or1 operator	=	G system double 31
	G trans - 57	327	C	linker region	+	G cis - 91	50	T	Or1 operator	=	G system double 57
	G trans - 98	467	A	CTD	+	G cis - 90	50	T	Or1 operator	=	G system double 98
	G trans - 138	650	T	CTD	+	G cis - 92	51	A	Or1 operator	=	G system double 138
	G trans - 28	170	T	NTD	+	G cis - 93	51	C	Or1 operator	=	G system double 28
	G trans - 73	384	A	linker region	+	G cis - 94	51	T	Or1 operator	=	G system double 73
	G trans - 127	608	C	CTD	+	G cis - 95	52	A	Or1 operator	=	G system double 127
	G trans - 124	593	C	CTD	+	G cis - 96	52	T	Or1 operator	=	G system double 124
	G trans - 119	577	C	CTD	+	G cis - 97	53	A	Or1 operator	=	G system double 119
	G trans - 63	334	T	linker region	+	G cis - 98	53	C	Or1 operator	=	G system double 63
	G trans - 15	74	G	NTD	+	G cis - 99	53	G	Or1 operator	=	G system double 15
	G trans - 17	79	C	NTD	+	G cis - 100	53	G	Or1 operator	=	G system double 17
	G trans - 103	497	G	CTD	+	G cis - 101	60	C		=	G system double 103
	G trans - 62	333	A	linker region	+	G cis - 102	61	A		=	G system double 62
	G trans - 35	203	G	NTD	+	G cis - 103	61	T		=	G system double 35
	G trans - 93	441	T	CTD	+	G cis - 104	62	C		=	G system double 93
	G trans - 130	615	T	CTD	+	G cis - 105	62	C		=	G system double 130
	G trans - 16	78	T	NTD	+	G cis - 107	64	C		=	G system double 16
	G trans - 136	643	G	CTD	+	G cis - 106	64	C		=	G system double 136
	G trans - 102	497	A	CTD	+	G cis - 108	65	A		=	G system double 102
	G trans - 75	393	C	linker region	+	G cis - 109	65	G		=	G system double 75
	G trans - 83	418	A	CTD	+	G cis - 110	65	T		=	G system double 83
	G trans - 32	193	G	NTD	+	G cis - 111	66	G		=	G system double 32
	G trans - 61	333	T	linker region	+	G cis - 112	66	T		=	G system double 61
	G trans - 48	275	A	NTD	+	G cis - 114	67	A		=	G system double 48
	G trans - 51	291	G	linker region	+	G cis - 113	67	A		=	G system double 51
	G trans - 80	404	T	CTD	+	G cis - 115	67	C		=	G system double 80
	G trans - 140	663	A	CTD	+	G cis - 116	67	G		=	G system double 140
	G trans - 99	473	T	CTD	+	G cis - 117	68	A		=	G system double 99
	G trans - 116	556	A	CTD	+	G cis - 118	68	C		=	G system double 116
	G trans - 47	269	T	NTD	+	G cis - 119	68	T		=	G system double 47
	G trans - 108	526	A	CTD	+	G cis - 120	69	C		=	G system double 108
	G trans - 6	34	A	NTD	+	G cis - 121	70	T		=	G system double 6
	G trans - 19	80	C	NTD	+	G cis - 122	71	A		=	G system double 19
	G trans - 45	261	T	NTD	+	G cis - 123	71	G		=	G system double 45
	G trans - 142	677	C	CTD	+	G cis - 124	71	T		=	G system double 142
	G trans - 20	95	C	NTD	+	G cis - 125	73	C		=	G system double 20
	G trans - 66	352	T	linker region	+	G cis - 126	73	G		=	G system double 66
	G trans - 3	12	C	NTD	+	G cis - 127	73	T		=	G system double 3
	G trans - 53	294	A	linker region	+	G cis - 128	74	A		=	G system double 53
	G trans - 74	388	C	linker region	+	G cis - 129	74	C		=	G system double 74
	G trans - 143	680	A	CTD	+	G cis - 130	74	T		=	G system double 143
	G trans - 129	615	G	CTD	+	G cis - 131	75	C		=	G system double 129
	G trans - 1	5	C	N-Terminal Domain (NTD)	+	G cis - 133	75	G		=	G system double 1
	G trans - 78	399	G	CTD	+	G cis - 132	75	G		=	G system double 78
	G trans - 91	435	C	CTD	+	G cis - 134	75	T		=	G system double 91
	G trans - 56	325	A	linker region	+	G cis - 135	76	G		=	G system double 56
	G trans - 94	443	C	CTD	+	G cis - 136	78	A		=	G system double 94
	G trans - 68	357	C	linker region	+	G cis - 137	78	C		=	G system double 68
	G trans - 7	43	C	NTD	+	G cis - 138	78	G		=	G system double 7
	G trans - 33	200	A	NTD	+	G cis - 139	79	A		=	G system double 33
	G trans - 30	189	T	NTD	+	G cis - 141	79	T		=	G system double 30
	G trans - 72	376	C	linker region	+	G cis - 140	79	T		=	G system double 72
	G trans - 24	151	A	NTD	+	G cis - 142	80	G		=	G system double 24
	G trans - 12	70	T	NTD	+	G cis - 143	80	T		=	G system double 12
	G trans - 146	687	T	CTD	+	G cis - 144	81	A		=	G system double 146
	G trans - 54	295	T	linker region	+	G cis - 145	81	C		=	G system double 54
	G trans - 25	152	A	NTD	+	G cis - 146	81	G		=	G system double 25
	G trans - 139	657	C	CTD	+	G cis - 147	82	A		=	G system double 139
	G trans - 92	437	G	CTD	+	G cis - 148	82	C		=	G system double 92
	G trans - 101	497	C	CTD	+	G cis - 149	82	G		=	G system double 101
	G trans - 38	222	A	NTD	+	G cis - 150	84	T		=	G system double 38
	trans Mutant identity	trans mutated residue	trans mutation	trans mutation location		cis Mutant identity	cis mutated residue	cis mutation	cis mutation location		double mutant identity
