# Supplementary material for: The Sometime Husband of Three Katherines, Two Annes and One Jane: Play and Critical Essay.
Source: eLife journal article supplement (doi:10.7554/elife.28921), 2011-07-01

**Figure 2 – Figure Supplement 2**

**a) *cis*-element single mutants**

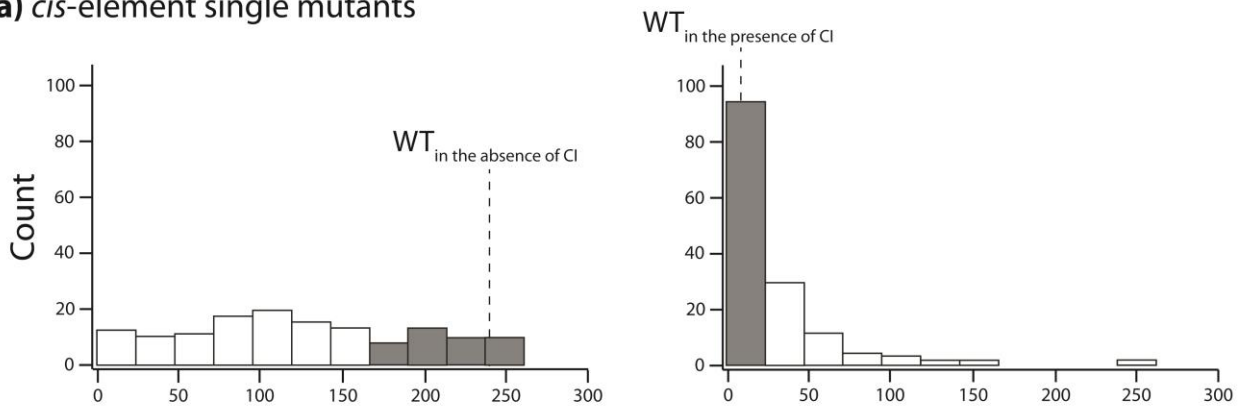

**b) *trans*-element single mutants**

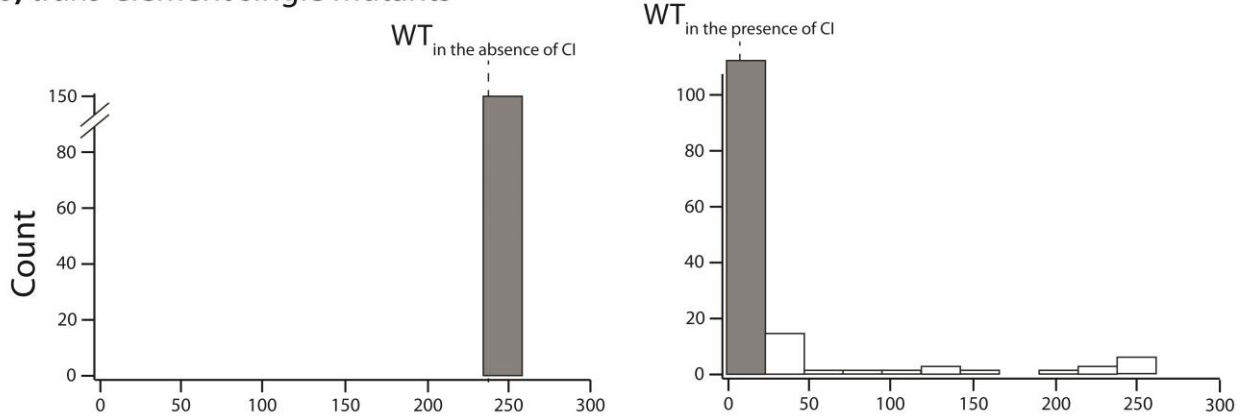

**c) *system* double mutants**

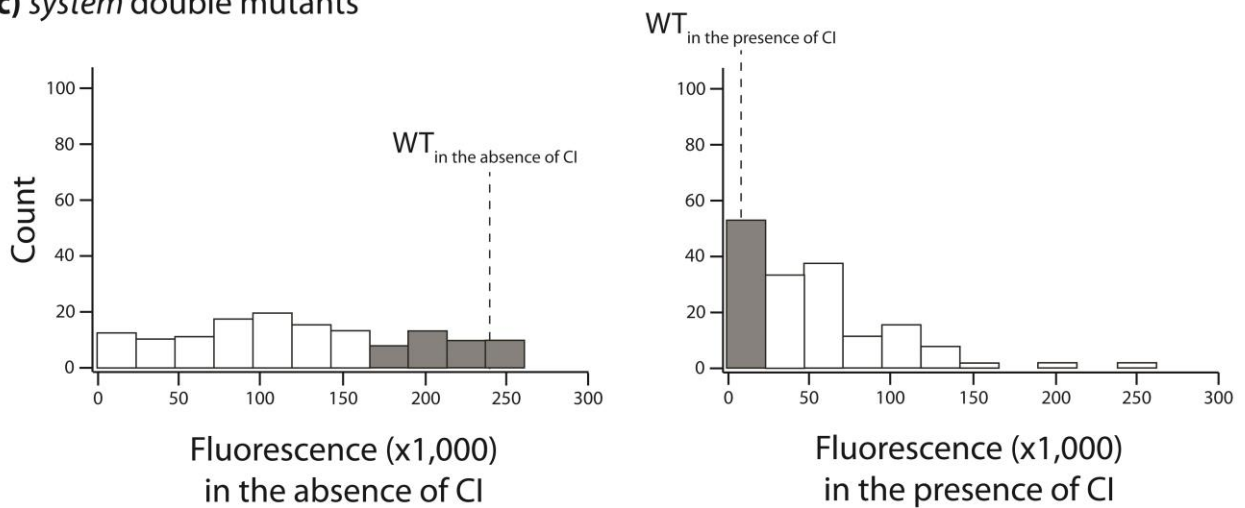

Supplement: supp [file elife_poa_e28921_Figure_2_figure_supplement_2.pdf › elife_poa_e28921_Figure_2_figure_supplement_2.pdf]
