# Supplementary material for: The Sometime Husband of Three Katherines, Two Annes and One Jane: Play and Critical Essay.
Source: eLife journal article supplement (doi:10.7554/elife.28921), 2011-07-01
Supplement: supp [file elife_poa_e28921_Figure_2_figure_supplement_3.pdf › elife_poa_e28921_Figure_2_figure_supplement_3.pdf]

### Figure 2 – Figure Supplement 3

[illegible]
