# Supplementary material for: The Sometime Husband of Three Katherines, Two Annes and One Jane: Play and Critical Essay.
Source: eLife journal article supplement (doi:10.7554/elife.28921), 2011-07-01

## Figure 2 – Figure Supplement 7

**A)** wildtype  $P_R$  system (“wildtype phenotypes”)

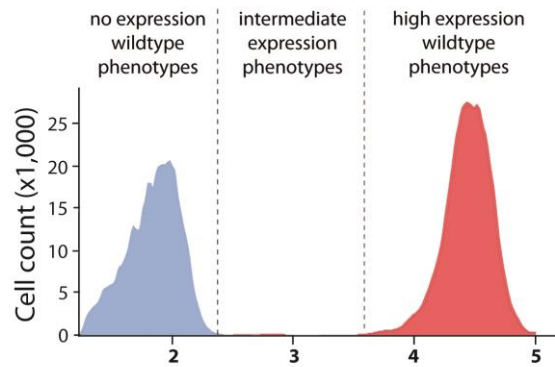

**B)** low number of mutations in system

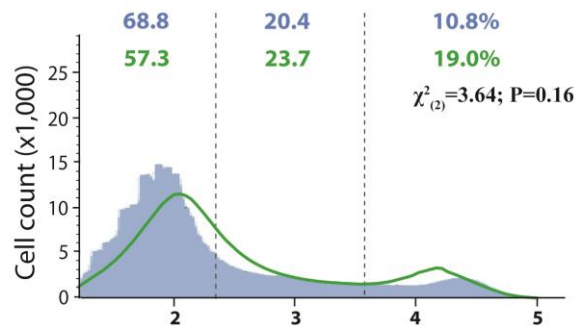

**C)** intermediate number of mutations in system

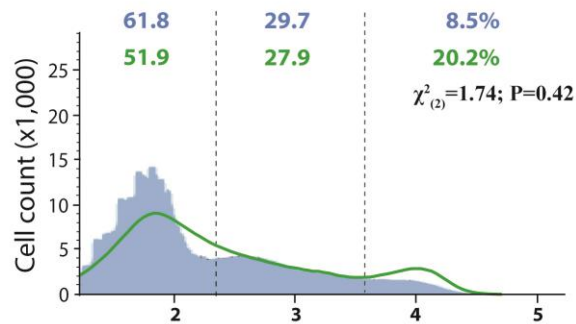

**D)** high number of mutations in system

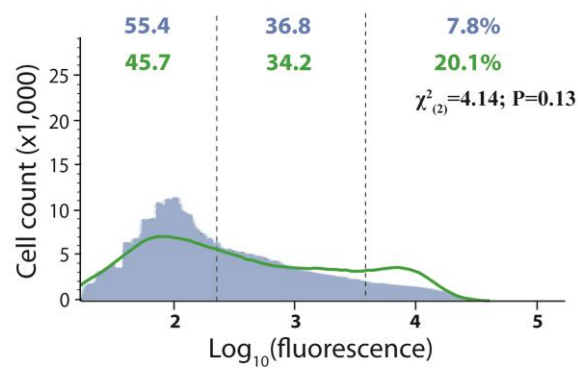

Supplement: supp [file elife_poa_e28921_Figure_2_figure_supplement_7.pdf › elife_poa_e28921_Figure_2_figure_supplement_7.pdf]
