# Supplementary material for: The Sometime Husband of Three Katherines, Two Annes and One Jane: Play and Critical Essay.
Source: eLife journal article supplement (doi:10.7554/elife.28921), 2011-07-01
Supplement: supp [file elife_poa_e28921_Figure_2_figure_supplement_8.pdf › elife_poa_e28921_Figure_2_figure_supplement_8.pdf]

**Figure 2 – Figure Supplement 8**

| Mutant library                            | Environment    | Subsample size (x1,000) | D statistic        | P value |
|-------------------------------------------|----------------|-------------------------|--------------------|---------|
| Low mutation number <i>cis</i>            | Absence of cl  | 50                      | 0.0035             | 0.61    |
|                                           |                | 100                     | 0.0019             | 0.89    |
|                                           |                | 250                     | 0.0011             | 0.97    |
|                                           |                | 500                     | $8 \times 10^{-4}$ | 0.99    |
|                                           | Presence of cl | 50                      | 0.0026             | 0.90    |
|                                           |                | 100                     | 0.0024             | 0.70    |
|                                           |                | 250                     | 0.0012             | 0.94    |
|                                           |                | 500                     | 0.001              | 0.93    |
| Intermediate mutation number <i>cis</i>   | Absence of cl  | 50                      | 0.0032             | 0.32    |
|                                           |                | 100                     | 0.0019             | 0.49    |
|                                           |                | 250                     | 0.0023             | 0.96    |
|                                           |                | 500                     | $6 \times 10^{-4}$ | 0.99    |
|                                           | Presence of cl | 50                      | 0.002              | 0.99    |
|                                           |                | 100                     | 0.0024             | 0.67    |
|                                           |                | 250                     | 0.0024             | 0.23    |
|                                           |                | 500                     | $6 \times 10^{-4}$ | 0.99    |
| High mutation number <i>cis</i>           | Absence of cl  | 50                      | 0.0028             | 0.84    |
|                                           |                | 100                     | 0.0045             | 0.56    |
|                                           |                | 250                     | 0.001              | 0.99    |
|                                           |                | 500                     | $6 \times 10^{-4}$ | 0.99    |
|                                           | Presence of cl | 50                      | 0.0031             | 0.75    |
|                                           |                | 100                     | 0.0027             | 0.52    |
|                                           |                | 250                     | 0.001              | 0.99    |
|                                           |                | 500                     | $9 \times 10^{-4}$ | 0.96    |
| Low mutation number <i>trans</i>          | Presence of cl | 50                      | 0.0049             | 0.21    |
|                                           |                | 100                     | 0.0027             | 0.52    |
|                                           |                | 250                     | 0.0027             | 0.12    |
|                                           |                | 500                     | $7 \times 10^{-4}$ | 0.99    |
| Intermediate mutation number <i>trans</i> | Presence of cl | 50                      | 0.0034             | 0.66    |
|                                           |                | 100                     | 0.0017             | 0.96    |
|                                           |                | 250                     | 0.0015             | 0.75    |
|                                           |                | 500                     | $9 \times 10^{-4}$ | 0.97    |
| High mutation number <i>trans</i>         | Presence of cl | 50                      | 0.0026             | 0.91    |
|                                           |                | 100                     | 0.0025             | 0.65    |
|                                           |                | 250                     | 0.002              | 0.41    |
|                                           |                | 500                     | $6 \times 10^{-4}$ | 0.99    |
