# Supplementary material for: The Sometime Husband of Three Katherines, Two Annes and One Jane: Play and Critical Essay.
Source: eLife journal article supplement (doi:10.7554/elife.28921), 2011-07-01

**Figure 2 – Figure Supplement 9**

**A)** 'true' DME for *cis* ( $f_{cis}^+$ )

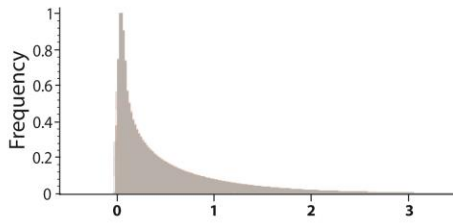

**B)**  $f_{cis}^+ * F_{wt}^+$  matches the observed *cis* DME

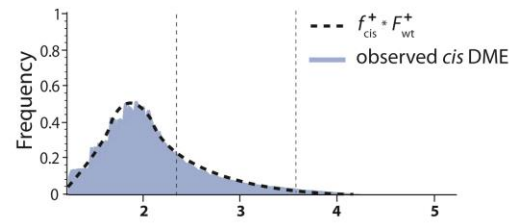

**C)**  $f_{cis}^+ * \text{unmodified } F_{trans}^+$

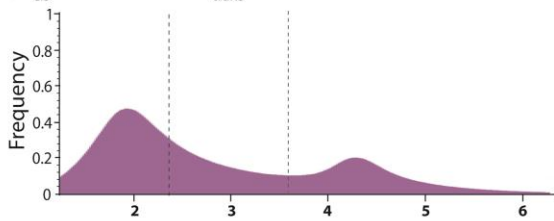

**D)** removing the high expression peak in *trans* DME ( $F_{trans}^+$ )

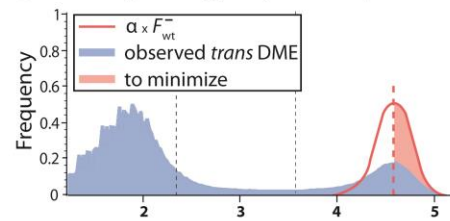

**E)** modified *trans* DME without the high expression peak

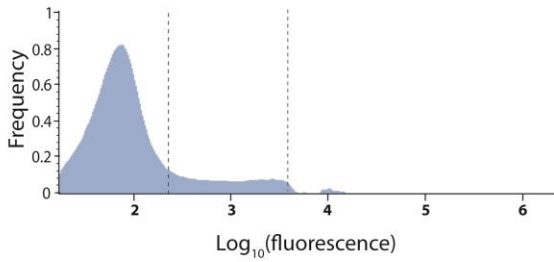

**F)** naive prediction of the system DME

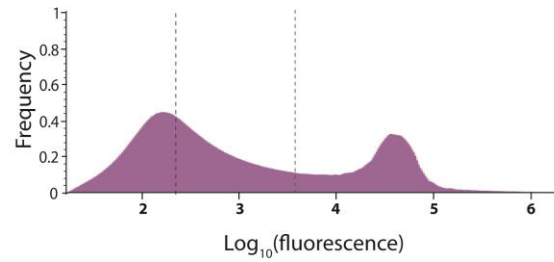

Supplement: supp [file elife_poa_e28921_Figure_2_figure_supplement_9.pdf › elife_poa_e28921_Figure_2_figure_supplement_9.pdf]
