# Supplementary figures and images for: The Sometime Husband of Three Katherines, Two Annes and One Jane: Play and Critical Essay.
Source: eLife journal article supplement (doi:10.7554/elife.28921), 2011-07-01

**Figure 2 – Figure Supplement 1**

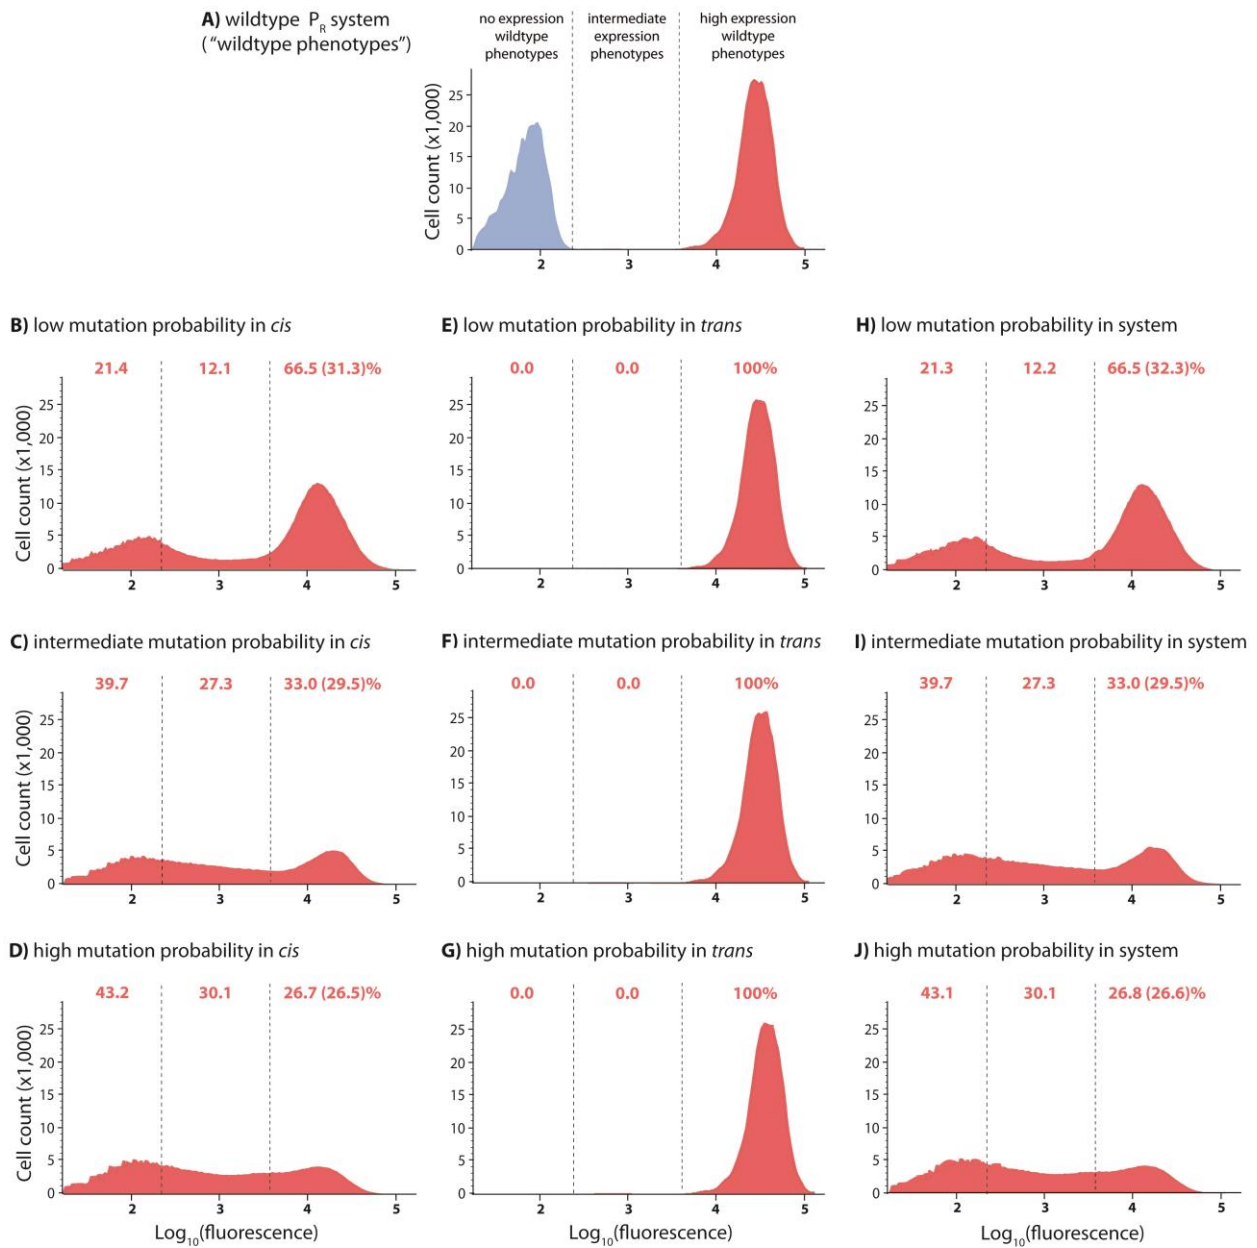

Supplement: supp [file elife_poa_e28921_Figure_2_figure_supplement_1.pdf › elife_poa_e28921_Figure_2_figure_supplement_1.pdf]

Figure 2 – Figure Supplement 4

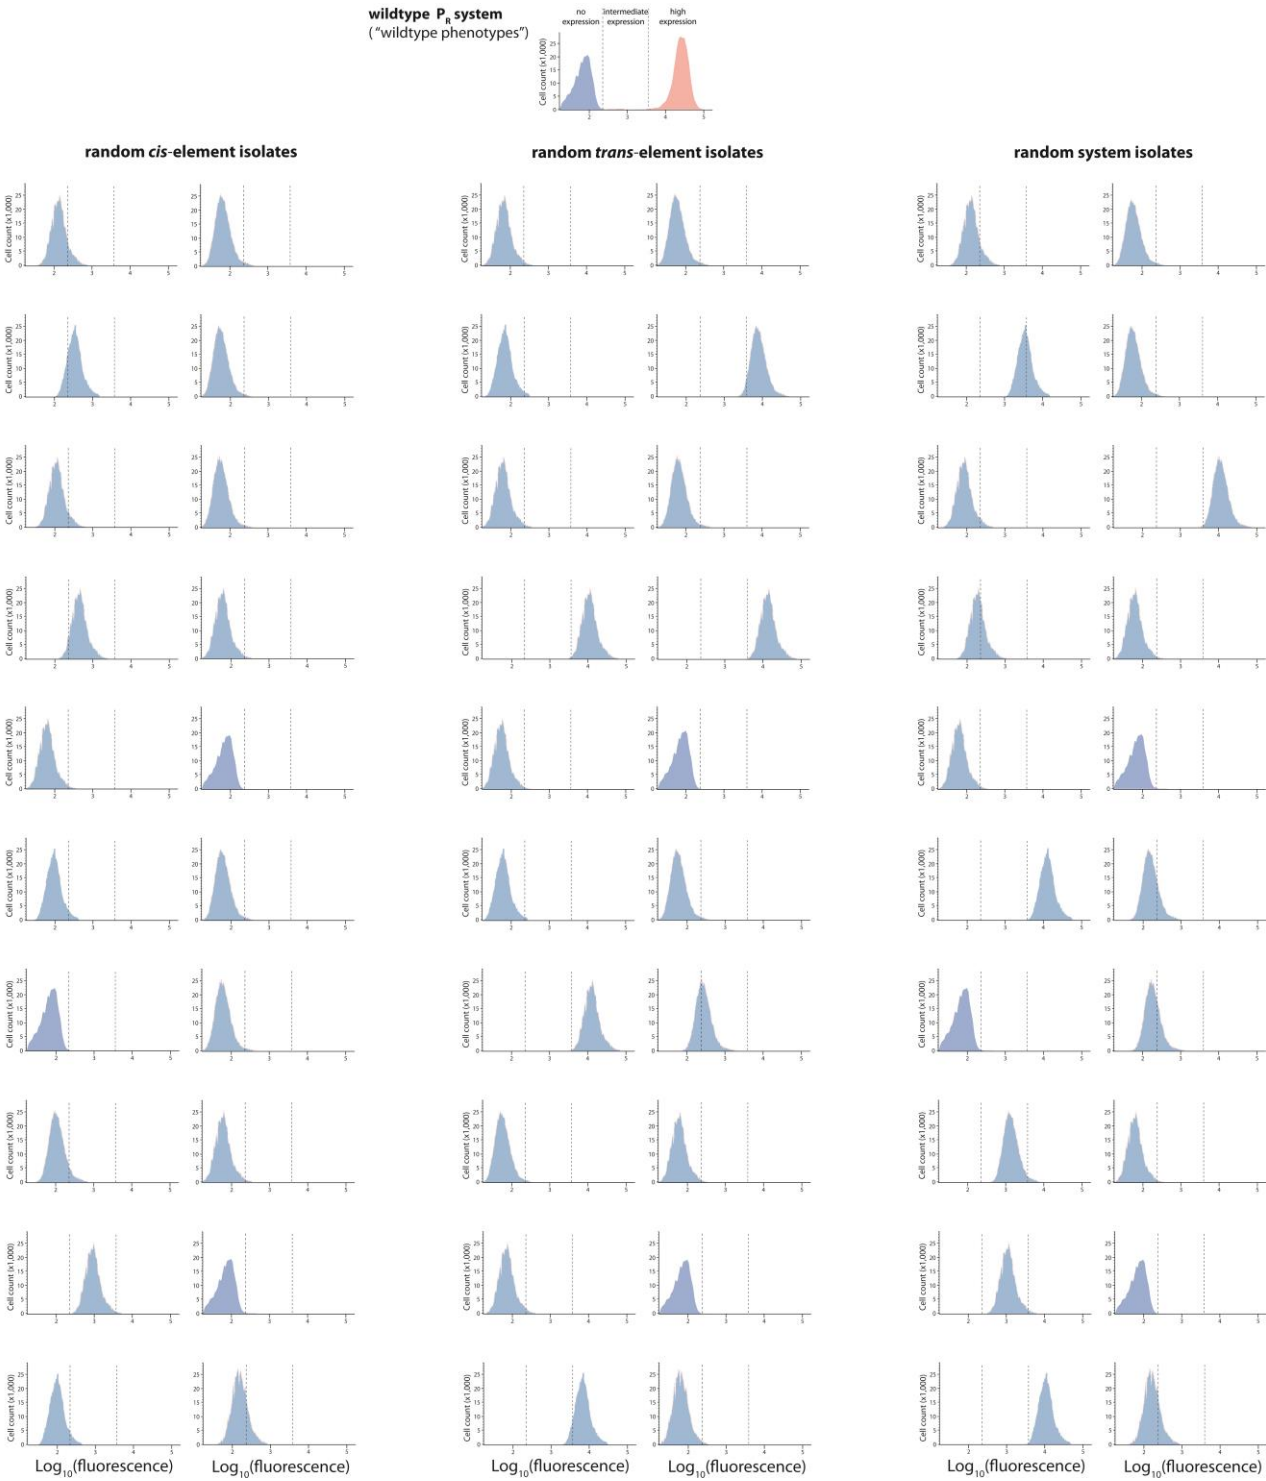

Supplement: supp [file elife_poa_e28921_Figure_2_figure_supplement_4.pdf › elife_poa_e28921_Figure_2_figure_supplement_4.pdf]

### Figure 2 – Figure Supplement 5

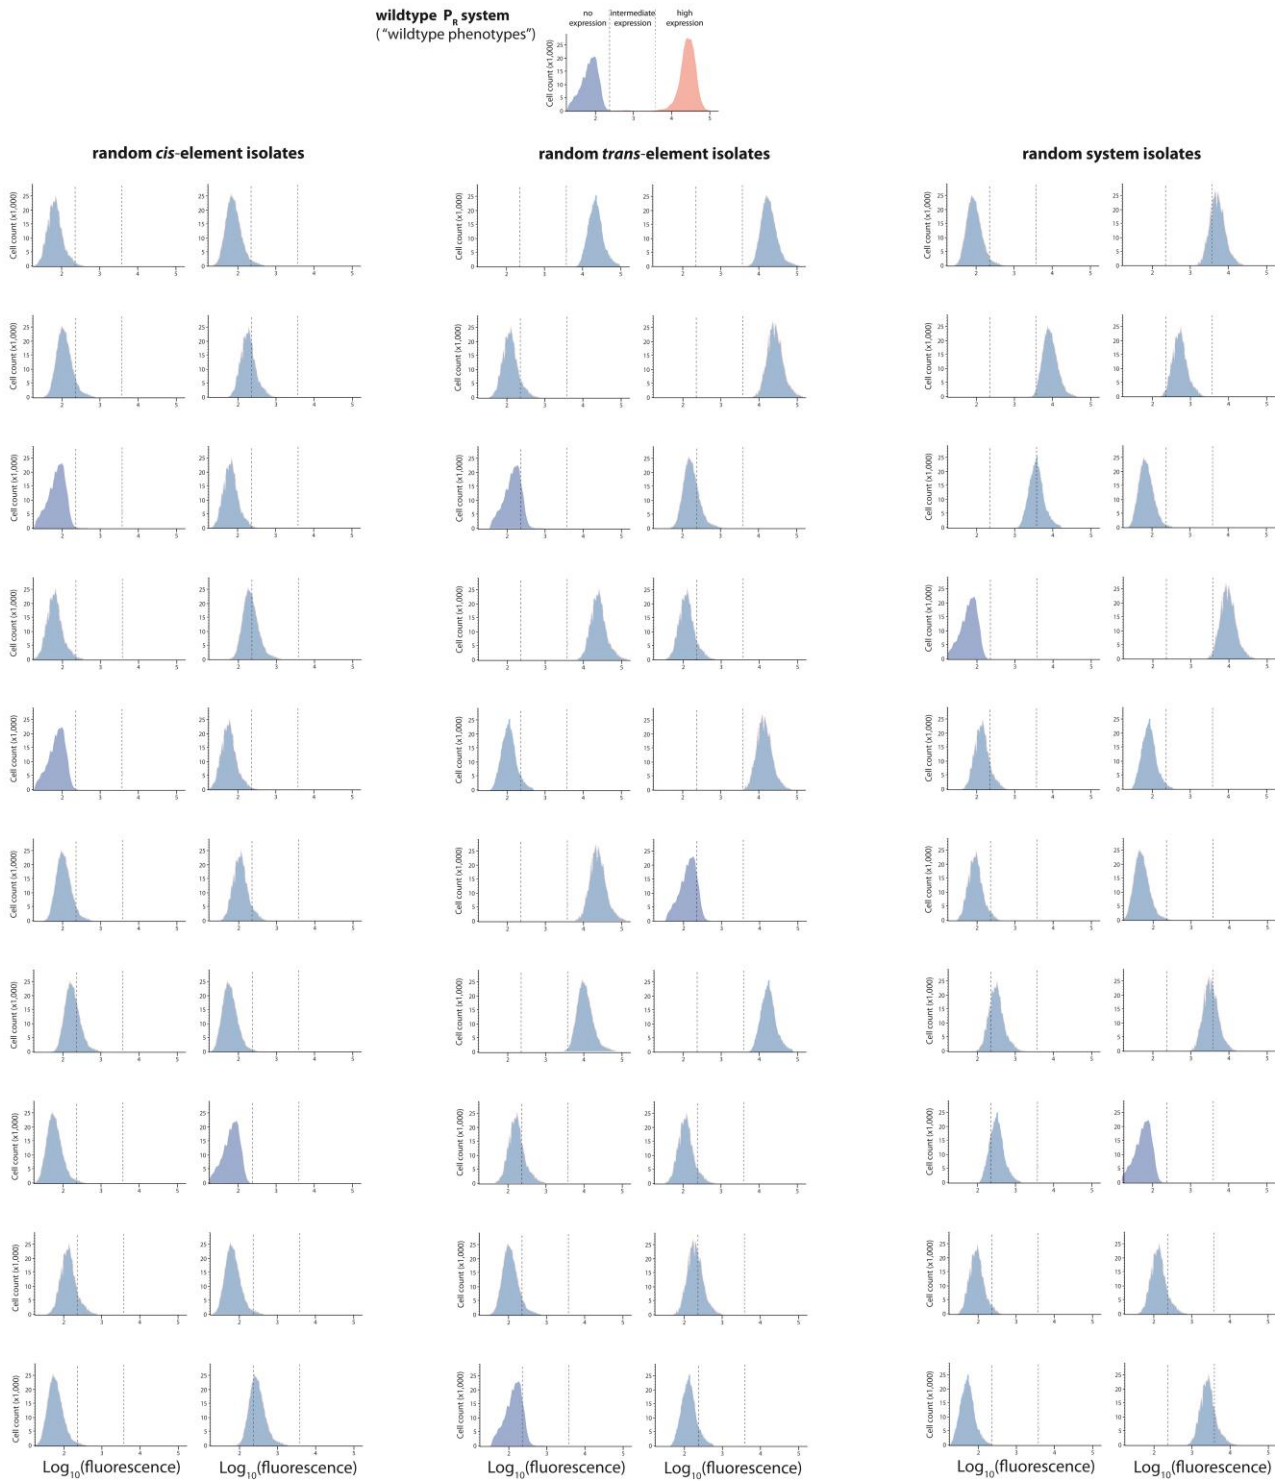

Supplement: supp [file elife_poa_e28921_Figure_2_figure_supplement_5.pdf › elife_poa_e28921_Figure_2_figure_supplement_5.pdf]

## Figure 2 – Figure Supplement 6

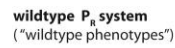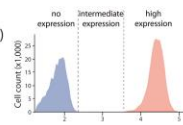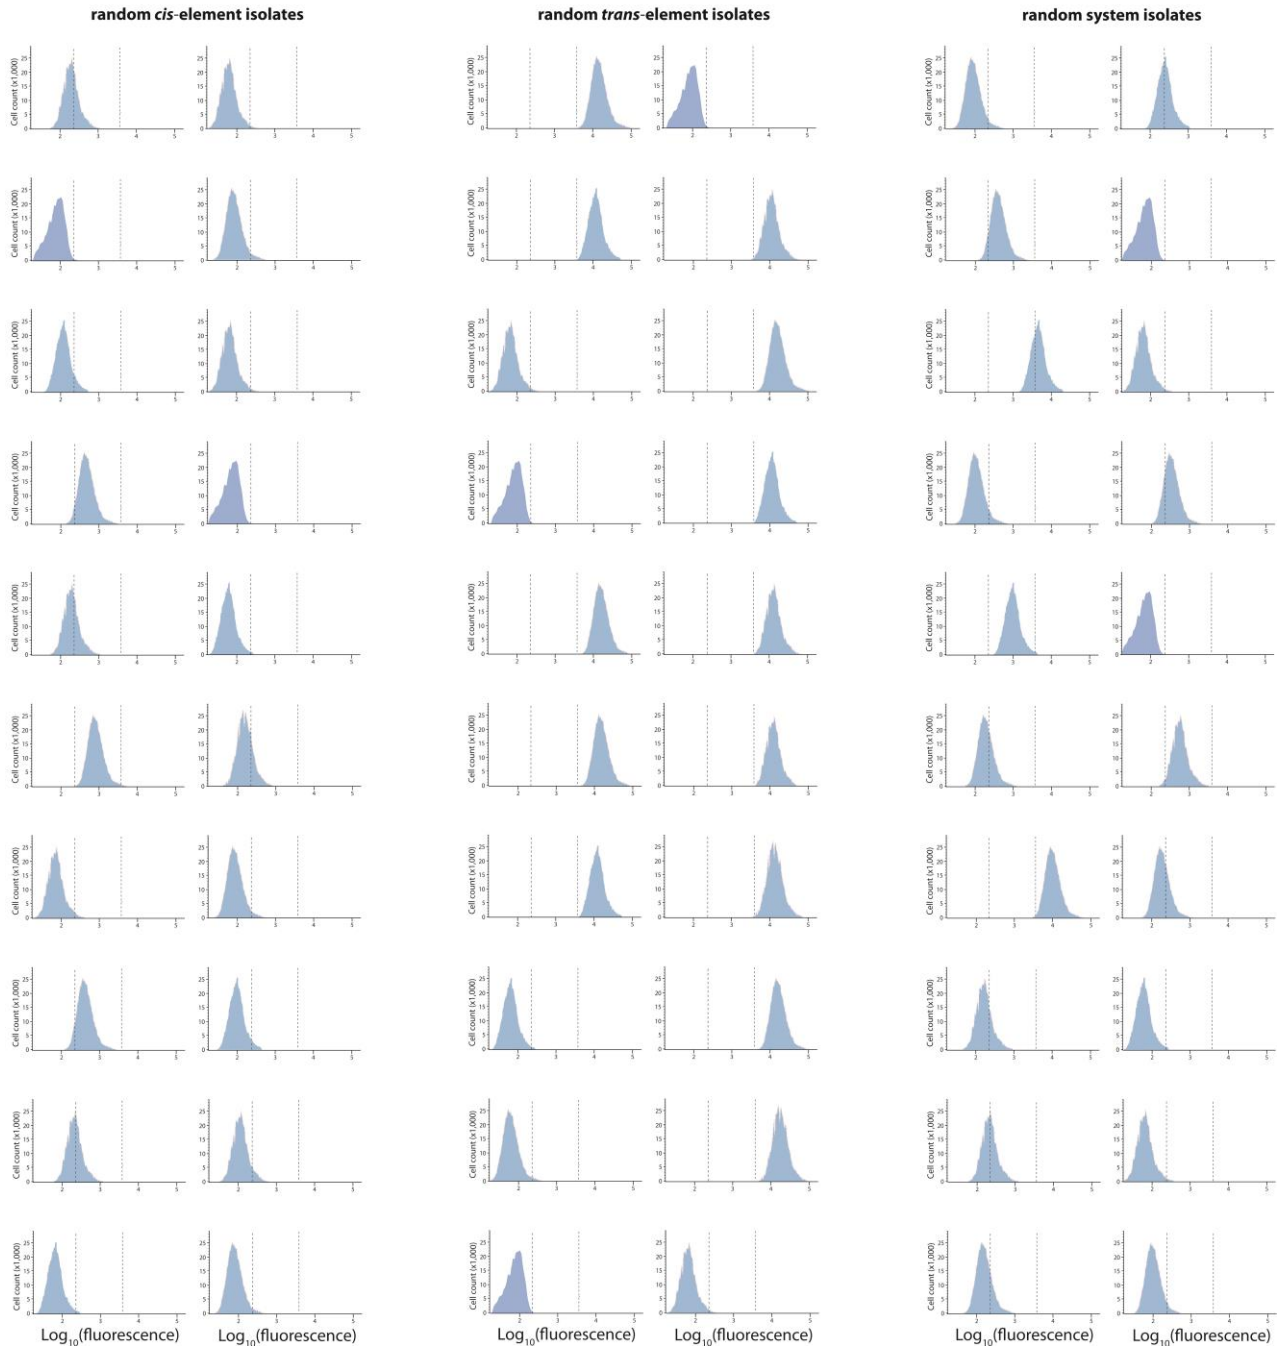

Supplement: supp [file elife_poa_e28921_Figure_2_figure_supplement_6.pdf › elife_poa_e28921_Figure_2_figure_supplement_6.pdf]

Figure 3 – Figure Supplement 1

A) Mutations in the *trans*-element

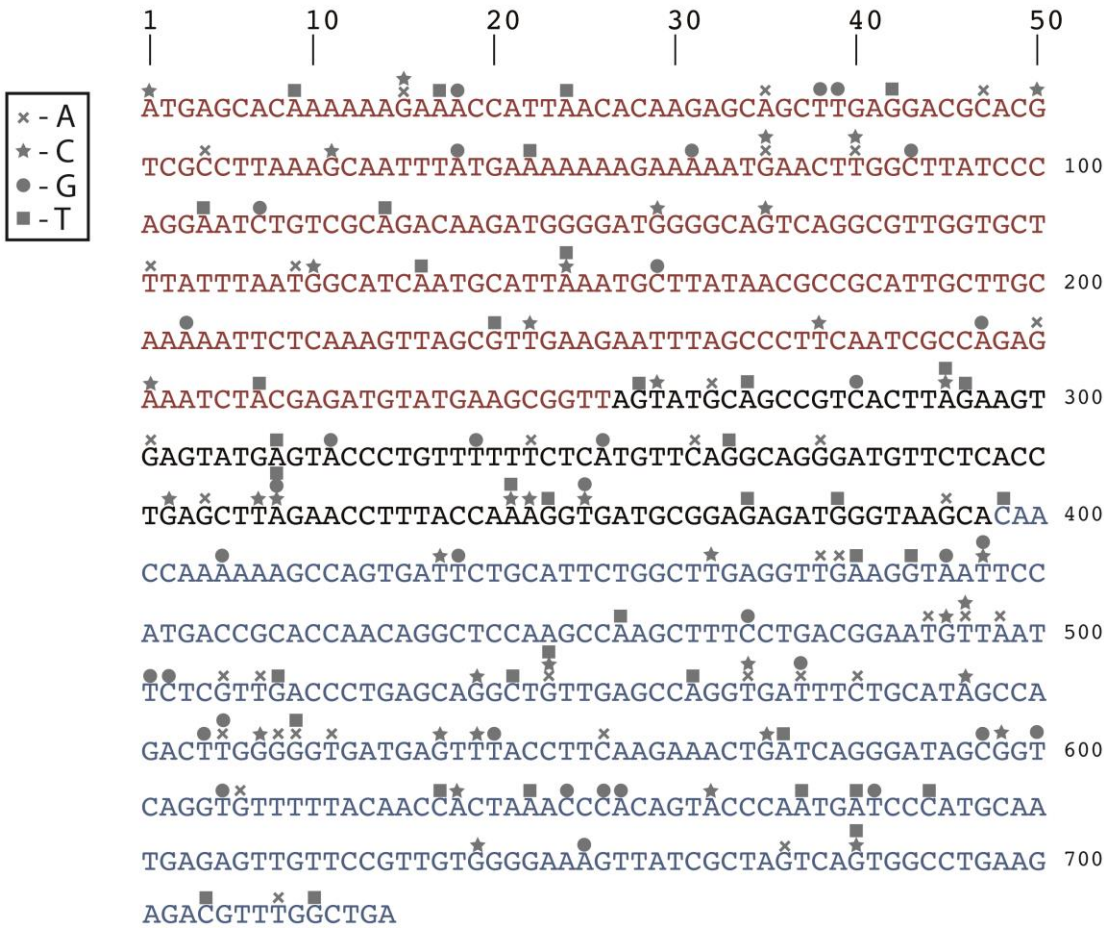

B) Mutations in the *cis*-element

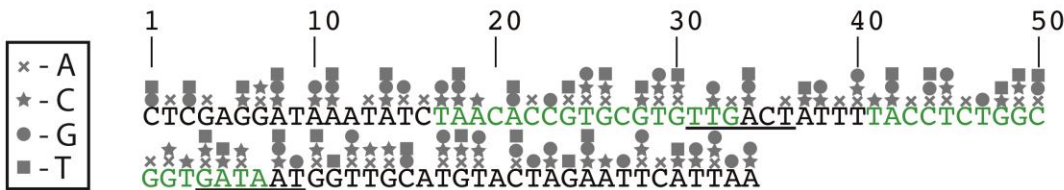

Supplement: supp [file elife_poa_e28921_Figure_3_figure_supplement_1.pdf › elife_poa_e28921_Figure_3_figure_supplement_1.pdf]

**Figure 3 – Figure Supplement 2**

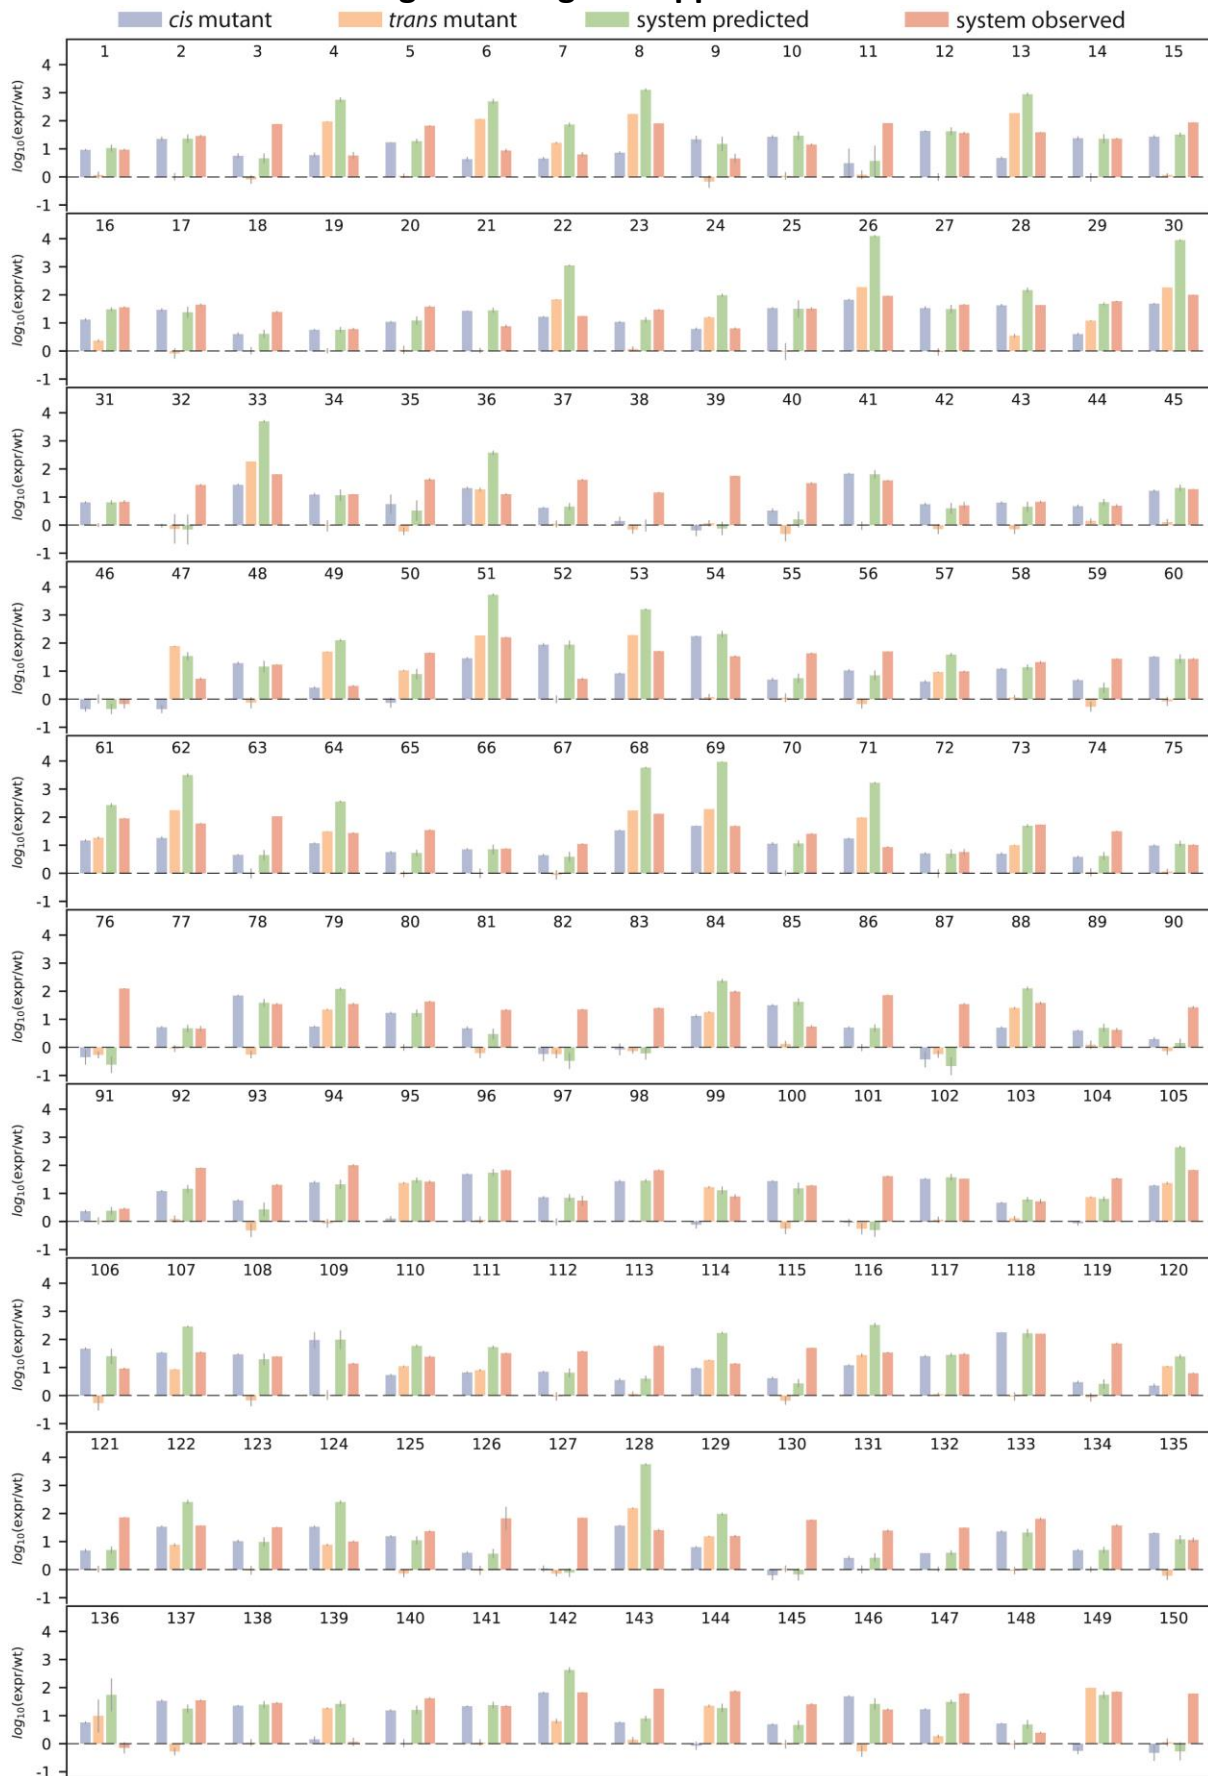

Supplement: supp [file elife_poa_e28921_Figure_3_figure_supplement_2.pdf › elife_poa_e28921_Figure_3_figure_supplement_2.pdf]

Figure 3 – Figure Supplement 3

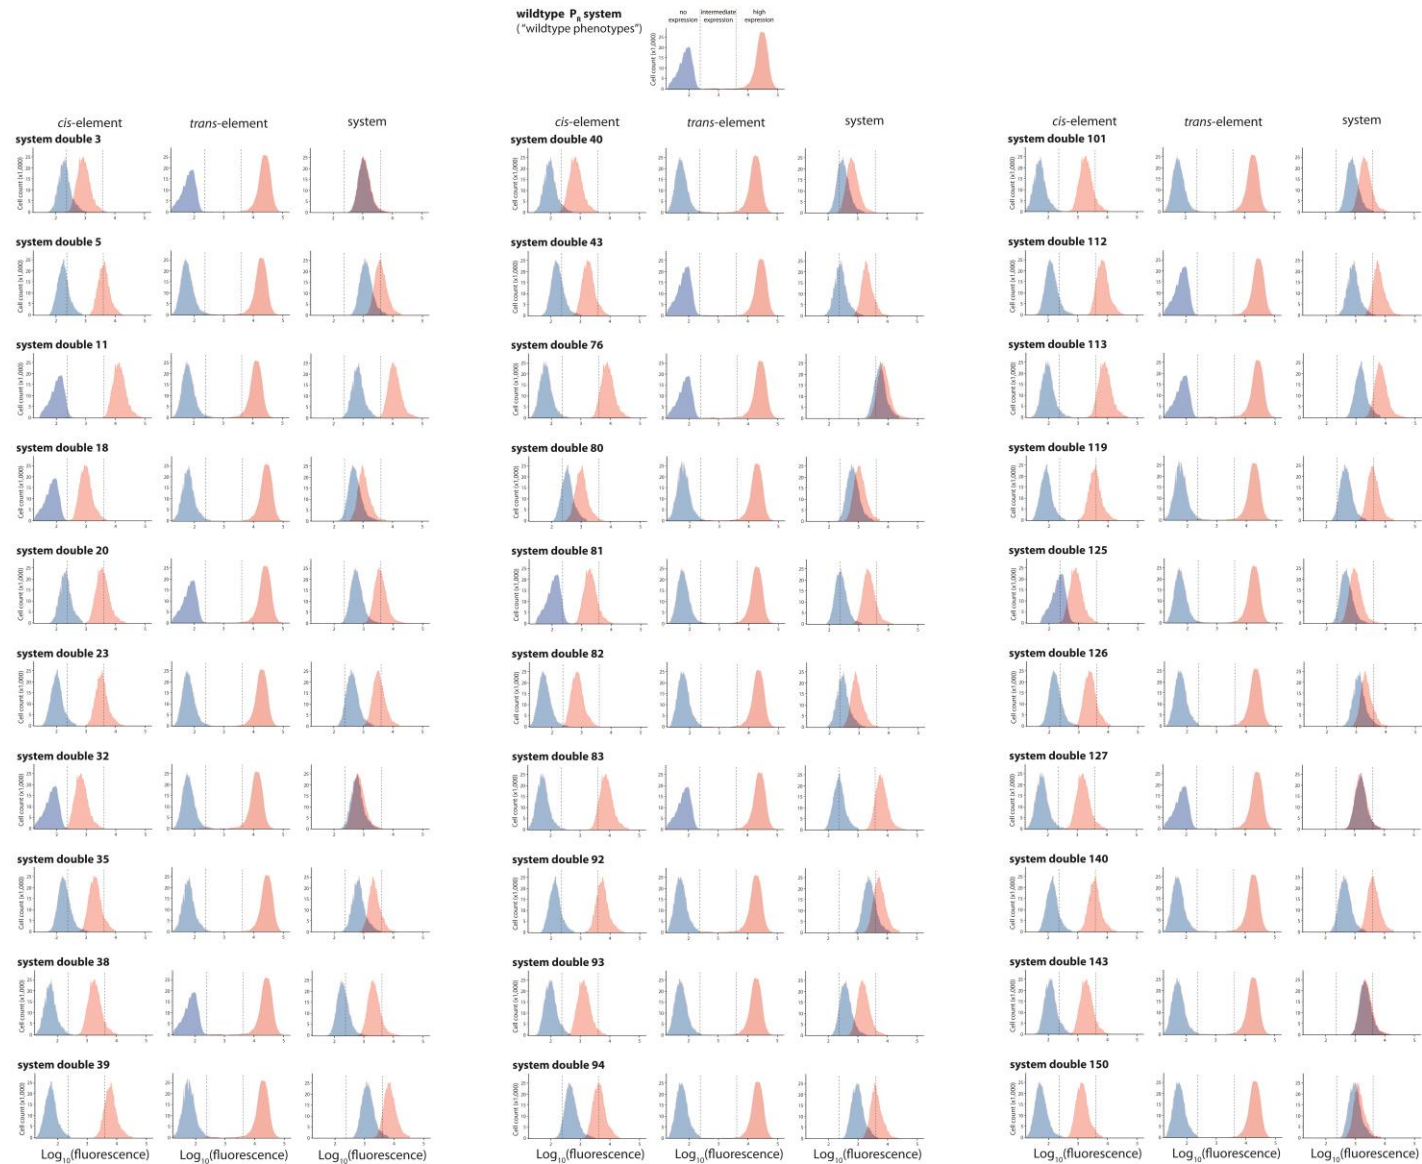

Supplement: supp [file elife_poa_e28921_Figure_3_figure_supplement_3.pdf › elife_poa_e28921_Figure_3_figure_supplement_3.pdf]

Figure 3 – Figure Supplement 4

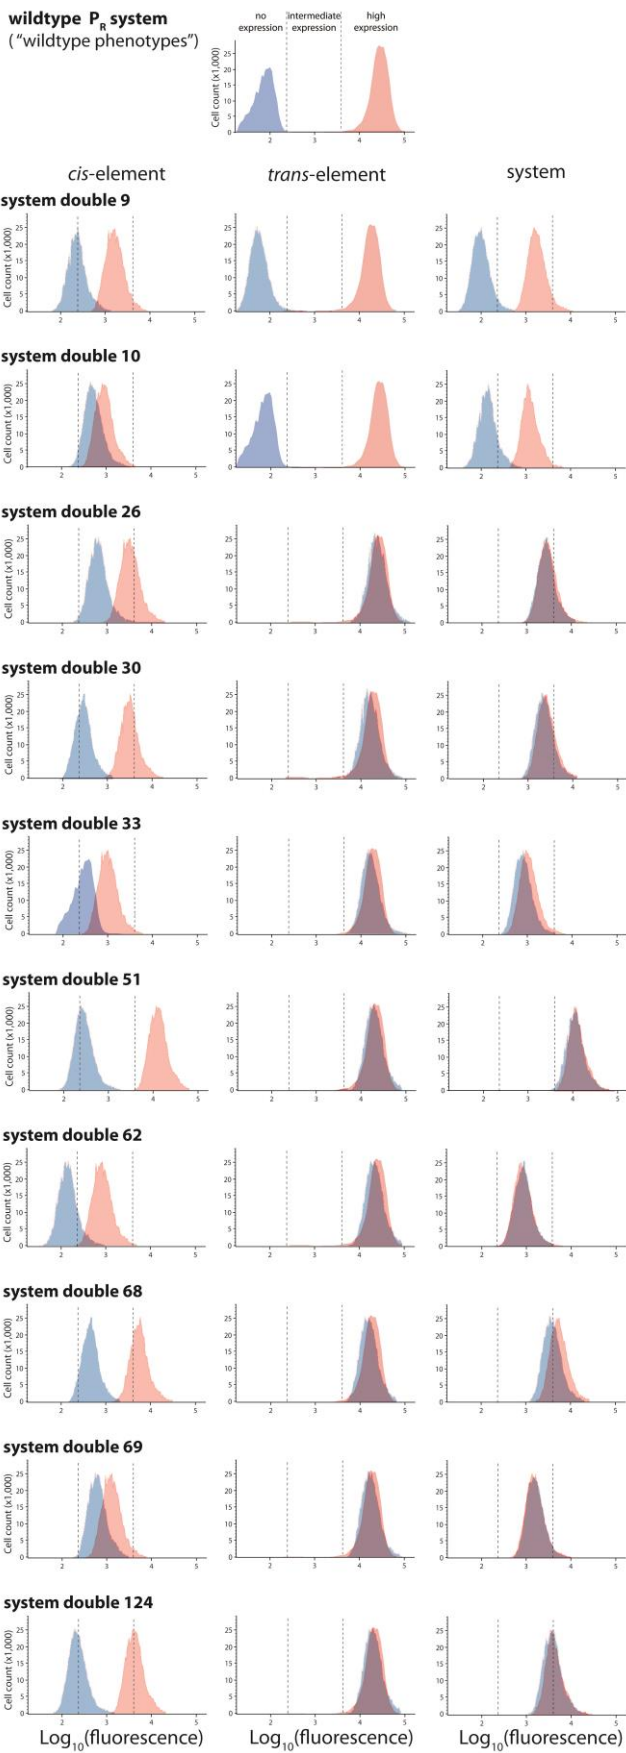

Supplement: supp [file elife_poa_e28921_Figure_3_figure_supplement_4.pdf › elife_poa_e28921_Figure_3_figure_supplement_4.pdf]

Figure 3 – Figure Supplement 5

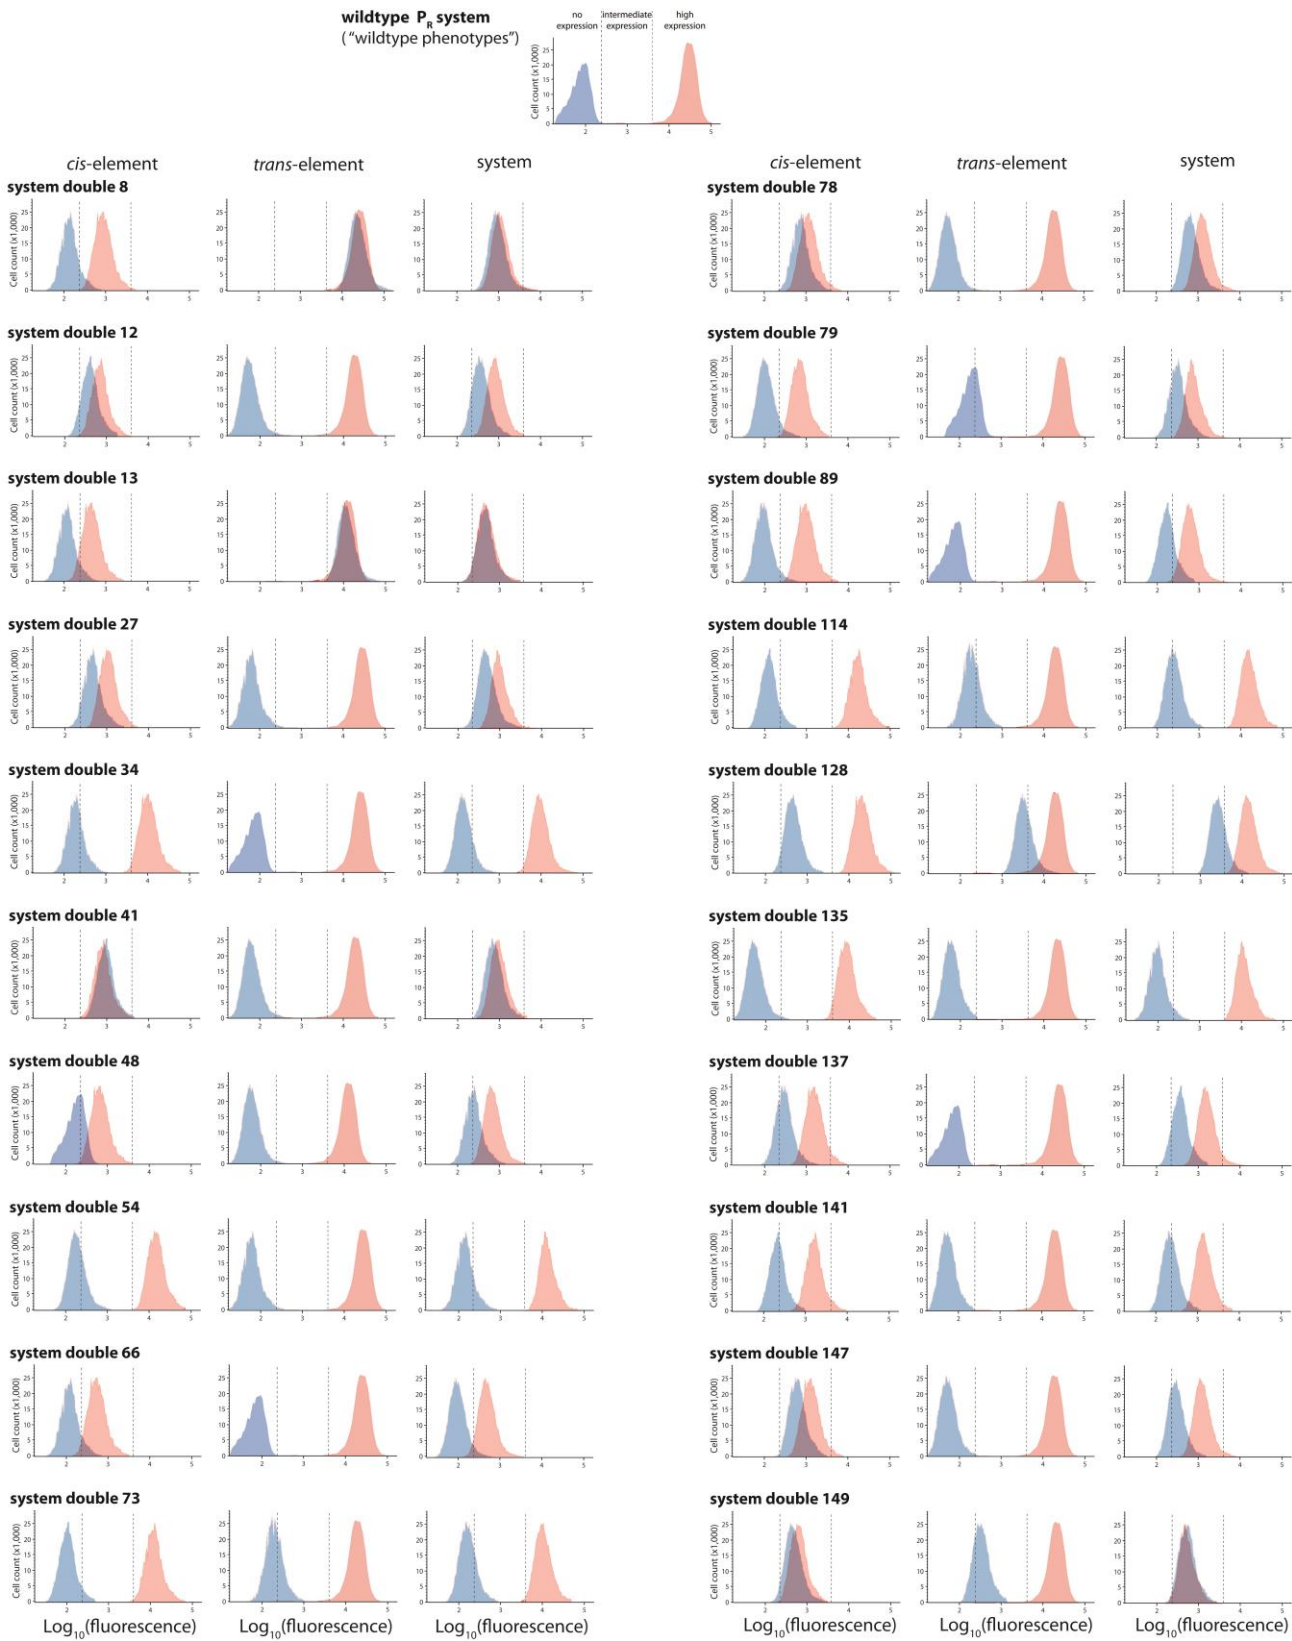

Supplement: supp [file elife_poa_e28921_Figure_3_figure_supplement_5.pdf › elife_poa_e28921_Figure_3_figure_supplement_5.pdf]

Figure 3 – Figure Supplement 6

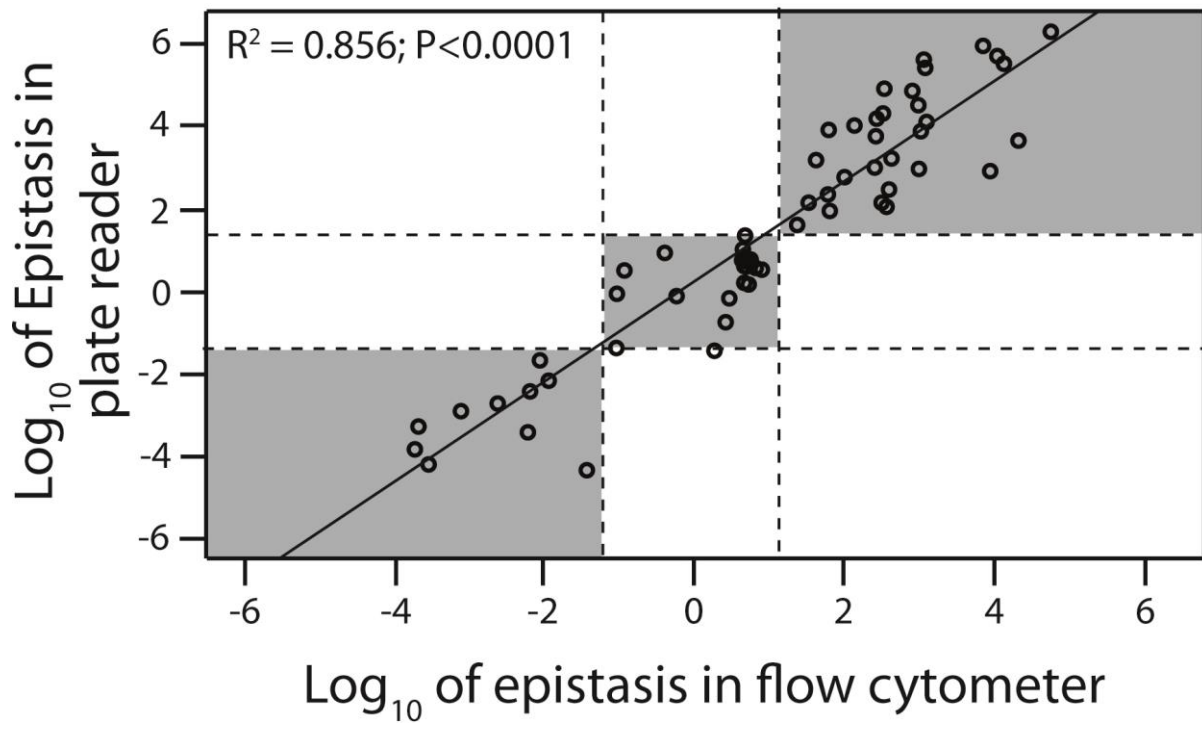

Supplement: supp [file elife_poa_e28921_Figure_3_figure_supplement_6.pdf › elife_poa_e28921_Figure_3_figure_supplement_6.pdf]

**Figure 6 – Figure Supplement 2**

**A) Mutations in the *trans*-element**

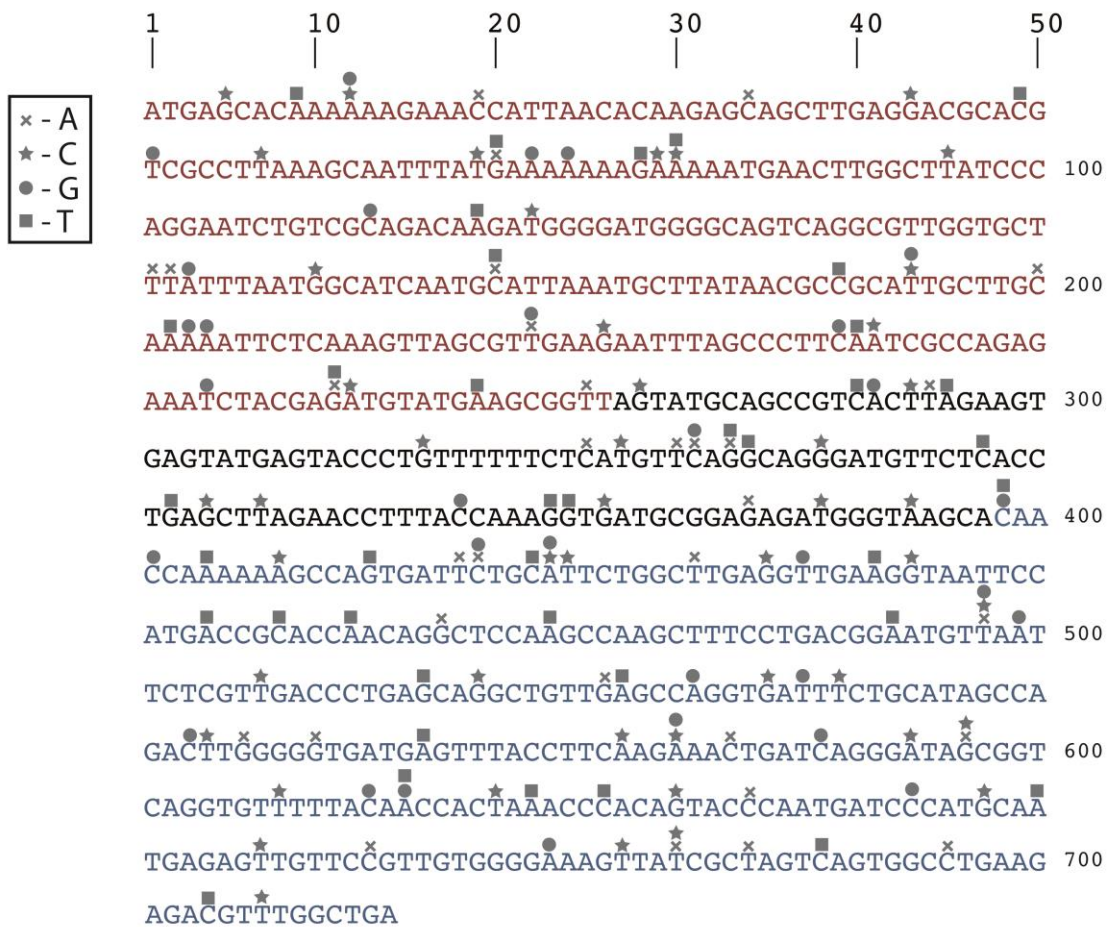

**B) Mutations in the *cis*-element**

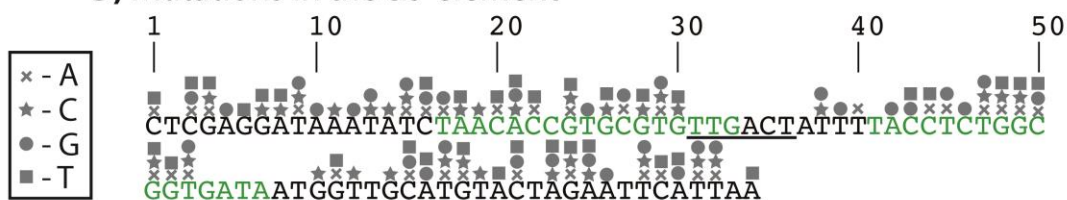

Supplement: supp [file elife_poa_e28921_Figure_6_figure_supplement_2.pdf › elife_poa_e28921_Figure_6_figure_supplement_2.pdf]
